# Supplementary material for: Landscape of transcriptome variations uncovering known and novel driver events in colorectal carcinoma
Source: PubMed Central journal article supplement (PMC6965099; doi:10.1038/s41598-019-57311-z), 2020-01-16
Supplement: 41598_2019_57311_MOESM1_ESM.pdf [file 41598_2019_57311_MOESM1_ESM.pdf]

## Supplementary Information

### Landscape of transcriptome variations uncovering known and novel driver events in colorectal carcinoma

Giovanna Pira<sup>1†</sup>, Paolo Uva<sup>2†</sup>, Antonio Scanu<sup>3</sup>, Paolo Cossu Rocca<sup>3,4</sup>, Luciano Murgia<sup>3</sup>, Elena Uleri<sup>1</sup>, Claudia Piu<sup>1</sup>, Alberto Porcu<sup>3</sup>, Ciriaco Carru<sup>1</sup>, Alessandra Manca<sup>5</sup>, Ivana Persico<sup>6</sup>, Maria Rosaria Muroi<sup>3</sup>, Francesca Sanges<sup>1</sup>, Caterina Serra<sup>1</sup>, Antonia Dolei<sup>1</sup>, Andrea Angius<sup>1,6\*</sup>, Maria Rosaria De Miglio<sup>3</sup>

<sup>1</sup>Department of Biomedical Sciences, University of Sassari, Viale San Pietro 43-b, 07100 Sassari, Italy;

<sup>2</sup>CRS4, Science and Technology Park Polaris, Piscina Manna, 09010 Pula, CA, Italy;

<sup>3</sup>Department of Medical, Surgical and Experimental Sciences, University of Sassari, Viale San Pietro 8, 07100 Sassari, Italy;

<sup>4</sup>Department of Diagnostic Services, "Giovanni Paolo II" Hospital, ASL Olbia-ATS Sardegna, Via Bazzoni-Sircana, 07026 Olbia, Italy;

<sup>5</sup>Department of Pathology, AOU Sassari, Via Matteotti 60, 07100 Sassari, Italy;

<sup>6</sup>Istituto di Ricerca Genetica e Biomedica (IRGB), CNR, Cittadella Universitaria di Cagliari, 09042 Monserrato (CA), Italy;

#### \*Corresponding author

Andrea Angius, PhD

Istituto di Ricerca Genetica e Biomedica

Consiglio Nazionale delle Ricerche

Cittadella Universitaria di Cagliari - 09042 Monserrato (Cagliari) Italy

E-mail: andrea.angius@irgb.cnr.it

**Table S1.** Designed primers for specific gene amplification and Sanger sequencing validation

| Gene target                        | Primers Sequence                | Tm      | Product size (bp) |
|------------------------------------|---------------------------------|---------|-------------------|
| KRAS exon 2                        | 5'-GTTTGTATTAAGGTTACTGGTGGGA-3' | 58 C°   | 270               |
|                                    | 5'-ATCAAAGAATGGTCCTGCAC-3'      |         |                   |
| KRAS exon 3                        | 5'-TCAAGTCCTTTGCCCATTTT-3'      | 55 C°   | 300               |
|                                    | 5'-AACCCACCTATAATGGTGAATATC-3'  |         |                   |
| KRT19-KRT18                        | 5'-GGTGCCACCATTGAGAACTCC-3'     | 54,4 C° | 385               |
|                                    | 5'-ACTTGTCTAGCTCCTCTCGGT-3'     |         |                   |
| KRT19-KRT18 Nested                 | 5'-GATCGAAGGCCTGAAGGAAGAG-3'    | 58,4 C° | 111               |
|                                    | 5'-GCATCTACCTCCACGGTCAA-3'      |         |                   |
| EEF1A1-HSP90AB1 (sample 11)        | 5'-GGGTGGAGACTGAAGTTAGGC-3'     | 57 C°   | 385               |
|                                    | 5'-AAGCCAGAAGATAGCAGGGC-3'      |         |                   |
| EEF1A1-HSP90AB1 Nested (sample 11) | 5'-TCAGGTGTCGTGAAAACCTACCC-3'   | 58,4 C° | 222               |
|                                    | 5'-ACCACCAGGTCTTAACTGC-3'       |         |                   |
| EEF1A1-HSP90AB1 (sample 43)        | 5'-GGTGTCGTGAAAACCTACCCCT-3'    | 55 C°   | 392               |
|                                    | 5'-TGTCATCAGGGTTTCTGGTCC-3'     |         |                   |
| EEF1A1-HSP90AB1 Nested (sample 43) | 5'-GGACACGTAGATTCGGGCAA-3'      | 58,4 C° | 225               |
|                                    | 5'-CTTACCGCTGTCATCCTCCTC-3'     |         |                   |

### Supplementary Fig. S1.

Heat map and hierarchical clustering dendrogram of differentially expressed mRNA transcripts. The column clustering showed a distinguishable expression profiling of 1378 differentially expressed mRNA transcripts between CRC and NCT. The scale of expression level was shown in the color key.

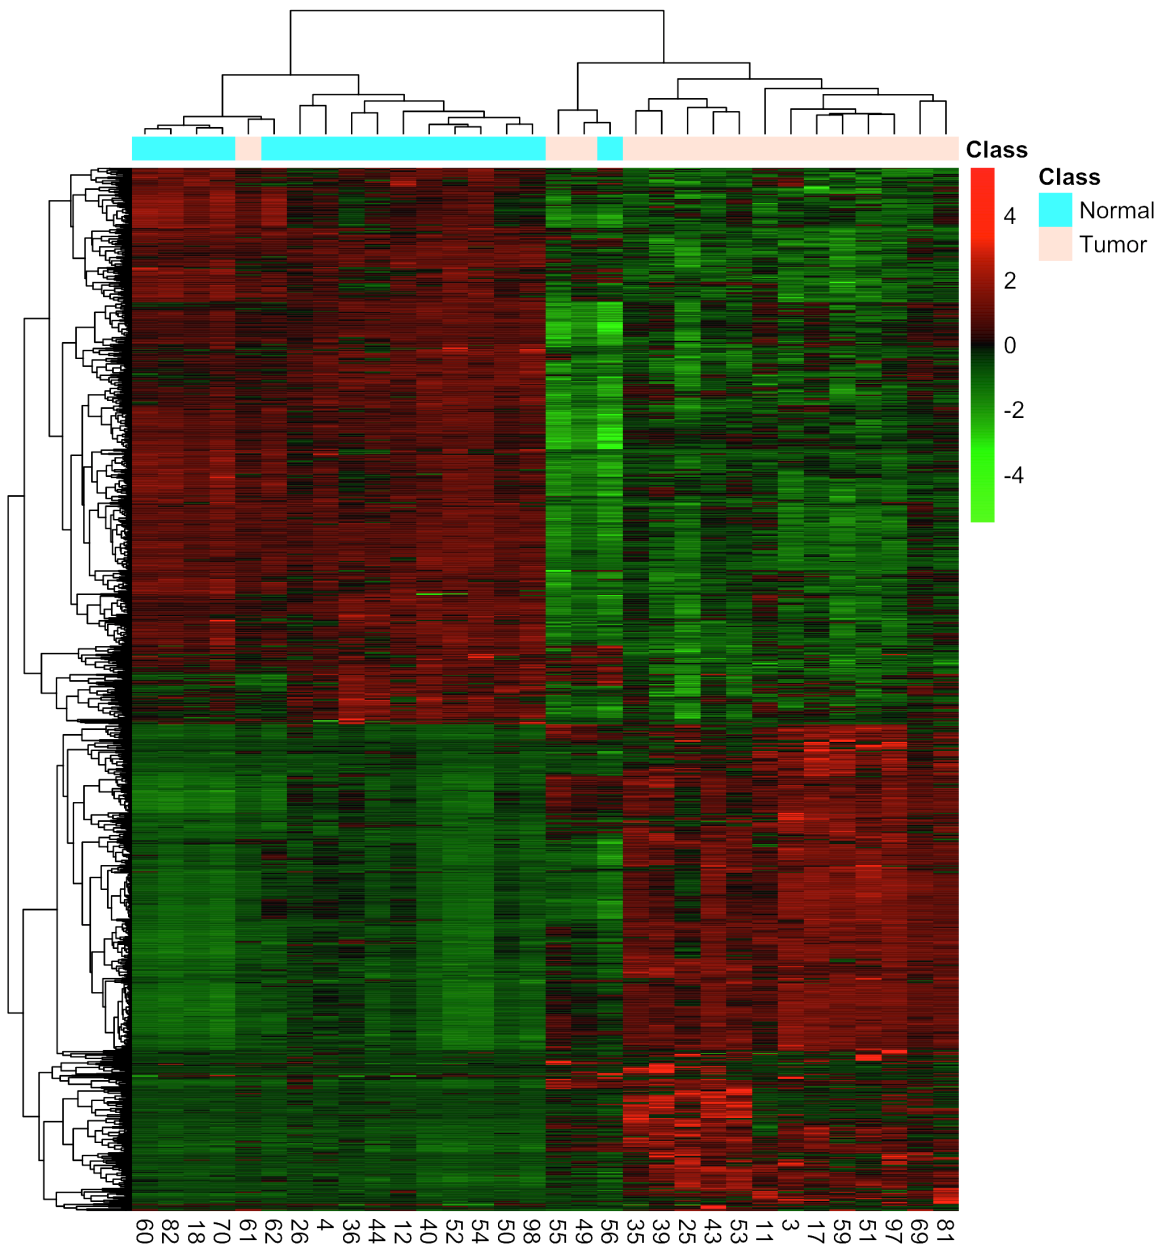

**Table S2**

Gene up- and downregulated in colorectal carcinoma.

| test_id         | gene_name    | locus                     | Average expression |       | log2<br>(CRC/NCT) | Class     | p_value  | q_value   |
|-----------------|--------------|---------------------------|--------------------|-------|-------------------|-----------|----------|-----------|
|                 |              |                           | CRC                | NCT   |                   |           |          |           |
| XLOC_016<br>809 | LOC101927884 | chr2:75719443-75822893    | 0,641              | 0,001 | 9,45              | CRC > NCT | 0,0028   | 0,0405866 |
| XLOC_013<br>943 | NOTUM        | chr17:79910379-79920497   | 40,940             | 0,088 | 8,86              | CRC > NCT | 5,00E-05 | 0,0020443 |
| XLOC_007<br>799 | LOC100190940 | chr12:130499823-130529900 | 3,131              | 0,009 | 8,46              | CRC > NCT | 5,00E-05 | 0,0020443 |
| XLOC_005<br>431 | MUC6         | chr11:1012622-1036706     | 1,121              | 0,004 | 8,14              | CRC > NCT | 0,0002   | 0,006387  |
| XLOC_007<br>709 | LINC01234    | chr12:114181235-114211506 | 4,033              | 0,016 | 8,00              | CRC > NCT | 0,0031   | 0,0433833 |
| XLOC_018<br>038 | RPRM         | chr2:154197365-154449793  | 0,876              | 0,005 | 7,50              | CRC > NCT | 0,00145  | 0,0259223 |
| XLOC_006<br>553 | SLCO1B3      | chr12:20963637-21070041   | 5,772              | 0,032 | 7,49              | CRC > NCT | 5,00E-05 | 0,0020443 |
| XLOC_024<br>731 | LINC01411    | chr5:173763356-173959512  | 2,764              | 0,016 | 7,42              | CRC > NCT | 5,00E-05 | 0,0020443 |
| XLOC_029<br>201 | FEZF1-AS1    | chr7:121941362-121954759  | 1,227              | 0,010 | 6,96              | CRC > NCT | 5,00E-05 | 0,0020443 |
| XLOC_007<br>089 | PIWIL1       | chr12:130822374-130856914 | 3,446              | 0,030 | 6,86              | CRC > NCT | 5,00E-05 | 0,0020443 |
| XLOC_033<br>390 | CLDN2        | chrX:106143292-106174300  | 51,599             | 0,463 | 6,80              | CRC > NCT | 5,00E-05 | 0,0020443 |
| XLOC_008<br>329 | LINC00460    | chr13:107028908-107036759 | 4,586              | 0,043 | 6,72              | CRC > NCT | 5,00E-05 | 0,0020443 |
| XLOC_002<br>525 | LEMD1        | chr1:205342379-205425214  | 5,732              | 0,061 | 6,55              | CRC > NCT | 5,00E-05 | 0,0020443 |
| XLOC_029<br>858 | FEZF1        | chr7:121941362-121954759  | 0,645              | 0,007 | 6,55              | CRC > NCT | 5,00E-05 | 0,0020443 |
| XLOC_006<br>046 | MMP7         | chr11:102391238-102401478 | 55,569             | 0,609 | 6,51              | CRC > NCT | 5,00E-05 | 0,0020443 |
| XLOC_018<br>093 | MYO3B        | chr2:171034654-171539570  | 0,390              | 0,005 | 6,30              | CRC > NCT | 5,00E-05 | 0,0020443 |
| XLOC_021<br>006 | -            | chr3:34226237-34477572    | 1,926              | 0,025 | 6,27              | CRC > NCT | 5,00E-05 | 0,0020443 |
| XLOC_014<br>283 | DSG3         | chr18:29027712-29058666   | 5,227              | 0,075 | 6,13              | CRC > NCT | 0,0001   | 0,003647  |
| XLOC_012<br>893 | IGF2BP1      | chr17:47074577-47133507   | 0,736              | 0,012 | 5,95              | CRC > NCT | 0,00175  | 0,0294656 |
| XLOC_031<br>695 | CA9          | chr9:35673893-35681182    | 45,781             | 0,744 | 5,94              | CRC > NCT | 5,00E-05 | 0,0020443 |
| XLOC_023<br>262 | ANXA10       | chr4:169013687-169115651  | 15,572             | 0,260 | 5,90              | CRC > NCT | 0,00035  | 0,0094833 |
| XLOC_011<br>497 | TRIM72       | chr16:31225202-31238552   | 1,118              | 0,019 | 5,90              | CRC > NCT | 0,0006   | 0,0139198 |
| XLOC_019<br>811 | SIM2         | chr21:38067491-38362677   | 2,207              | 0,037 | 5,89              | CRC > NCT | 0,00305  | 0,0429805 |
| XLOC_005<br>453 | -            | chr11:2227423-2233481     | 5,526              | 0,096 | 5,85              | CRC > NCT | 5,00E-05 | 0,0020443 |
| XLOC_007<br>554 | -            | chr12:75966943-76377950   | 0,790              | 0,014 | 5,81              | CRC > NCT | 5,00E-05 | 0,0020443 |
| XLOC_011<br>531 | NKD1         | chr16:50581545-50683157   | 10,217             | 0,194 | 5,72              | CRC > NCT | 5,00E-05 | 0,0020443 |
| XLOC_010<br>576 | LOC101927286 | chr15:97779480-98065041   | 8,426              | 0,172 | 5,61              | CRC > NCT | 5,00E-05 | 0,0020443 |
| XLOC_021<br>467 | TM4SF4       | chr3:149192367-149221181  | 17,539             | 0,362 | 5,60              | CRC > NCT | 5,00E-05 | 0,0020443 |
| XLOC_025<br>716 | FOXQ1        | chr6:1311758-1316660      | 16,776             | 0,348 | 5,59              | CRC > NCT | 5,00E-05 | 0,0020443 |
| XLOC_008<br>992 | DHRS2        | chr14:24099328-24114848   | 8,154              | 0,175 | 5,55              | CRC > NCT | 5,00E-05 | 0,0020443 |
| XLOC_017<br>723 | -            | chr2:67749743-67791797    | 0,945              | 0,020 | 5,53              | CRC > NCT | 0,00085  | 0,0178569 |
| XLOC_025<br>771 | RNF182       | chr6:13924676-13980496    | 0,536              | 0,013 | 5,37              | CRC > NCT | 0,00035  | 0,0094833 |

|                 |                                  |                          |         |        |      |           |          |           |
|-----------------|----------------------------------|--------------------------|---------|--------|------|-----------|----------|-----------|
| XLOC_017<br>144 | GAD1                             | chr2:171673199-171717659 | 2,159   | 0,057  | 5,26 | CRC > NCT | 5,00E-05 | 0,0020443 |
| XLOC_007<br>405 | KRT5,KRT6A,KRT6B,KRT6C,<br>KRT75 | chr12:52817311-52914385  | 12,028  | 0,323  | 5,22 | CRC > NCT | 5,00E-05 | 0,0020443 |
| XLOC_025<br>155 | ACSL6                            | chr5:131285666-131347761 | 4,074   | 0,110  | 5,21 | CRC > NCT | 5,00E-05 | 0,0020443 |
| XLOC_013<br>519 | KRT23                            | chr17:39077238-39132428  | 26,390  | 0,716  | 5,20 | CRC > NCT | 5,00E-05 | 0,0020443 |
| XLOC_022<br>366 | CLDN1                            | chr3:190023349-190041162 | 20,948  | 0,569  | 5,20 | CRC > NCT | 5,00E-05 | 0,0020443 |
| XLOC_026<br>417 | UNC93A                           | chr6:167684583-167729774 | 1,847   | 0,050  | 5,19 | CRC > NCT | 0,0002   | 0,006387  |
| XLOC_000<br>996 | DUSP27                           | chr1:167064086-167098402 | 8,384   | 0,233  | 5,17 | CRC > NCT | 0,00015  | 0,0050841 |
| XLOC_026<br>762 | PGC                              | chr6:41704448-41721880   | 3,157   | 0,094  | 5,07 | CRC > NCT | 0,00325  | 0,0448628 |
| XLOC_013<br>599 | ETV4                             | chr17:41605208-41623800  | 40,990  | 1,231  | 5,06 | CRC > NCT | 5,00E-05 | 0,0020443 |
| XLOC_031<br>271 | CASC19,CCAT1                     | chr8:128187718-128231595 | 4,902   | 0,155  | 4,98 | CRC > NCT | 5,00E-05 | 0,0020443 |
| XLOC_000<br>598 | EPHX4                            | chr1:92495532-92529212   | 4,406   | 0,141  | 4,97 | CRC > NCT | 5,00E-05 | 0,0020443 |
| XLOC_006<br>754 | NXP4                             | chr12:57610577-57620232  | 3,285   | 0,107  | 4,95 | CRC > NCT | 0,00075  | 0,0164378 |
| XLOC_029<br>566 | INHBA                            | chr7:41724709-41818976   | 3,331   | 0,115  | 4,86 | CRC > NCT | 5,00E-05 | 0,0020443 |
| XLOC_024<br>232 | LINC01021                        | chr5:27472387-27496508   | 1,125   | 0,042  | 4,74 | CRC > NCT | 5,00E-05 | 0,0020443 |
| XLOC_009<br>041 | PAX9                             | chr14:37126772-37643075  | 0,727   | 0,027  | 4,73 | CRC > NCT | 0,0016   | 0,0279196 |
| XLOC_007<br>339 | -                                | chr12:47779452-47821127  | 0,461   | 0,018  | 4,72 | CRC > NCT | 0,00075  | 0,0164378 |
| XLOC_015<br>461 | PRKCG                            | chr19:54385466-54410906  | 1,075   | 0,042  | 4,69 | CRC > NCT | 0,0001   | 0,003647  |
| XLOC_029<br>307 | PRSS1                            | chr7:142457211-142482401 | 2,445   | 0,097  | 4,66 | CRC > NCT | 0,00045  | 0,0114127 |
| XLOC_026<br>055 | C6orf223                         | chr6:43963460-44042389   | 6,608   | 0,265  | 4,64 | CRC > NCT | 5,00E-05 | 0,0020443 |
| XLOC_001<br>596 | HTR1D                            | chr1:23514265-23544010   | 2,942   | 0,120  | 4,62 | CRC > NCT | 5,00E-05 | 0,0020443 |
| XLOC_011<br>634 | CDH3                             | chr16:68678150-68732957  | 13,142  | 0,549  | 4,58 | CRC > NCT | 5,00E-05 | 0,0020443 |
| XLOC_019<br>235 | MYT1                             | chr20:62795826-62873606  | 0,721   | 0,031  | 4,55 | CRC > NCT | 0,0016   | 0,0279196 |
| XLOC_029<br>415 | ELFN1-AS1                        | chr7:1705748-1787590     | 10,473  | 0,456  | 4,52 | CRC > NCT | 0,0002   | 0,006387  |
| XLOC_013<br>561 | KRT17                            | chr17:39775691-39780882  | 43,031  | 1,876  | 4,52 | CRC > NCT | 5,00E-05 | 0,0020443 |
| XLOC_007<br>870 | -                                | chr12:13693017-13700768  | 0,312   | 0,014  | 4,52 | CRC > NCT | 0,001    | 0,0199726 |
| XLOC_011<br>771 | DPEP1                            | chr16:89679715-89708773  | 102,155 | 4,485  | 4,51 | CRC > NCT | 5,00E-05 | 0,0020443 |
| XLOC_017<br>788 | REG3A                            | chr2:79384131-79386880   | 536,227 | 23,545 | 4,51 | CRC > NCT | 0,0004   | 0,01042   |
| XLOC_004<br>828 | GYLTL1B                          | chr11:45943171-45950694  | 8,566   | 0,382  | 4,49 | CRC > NCT | 5,00E-05 | 0,0020443 |
| XLOC_028<br>731 | CYP2W1                           | chr7:1022828-1029428     | 14,453  | 0,668  | 4,44 | CRC > NCT | 5,00E-05 | 0,0020443 |
| XLOC_013<br>108 | CBX2                             | chr17:77751966-77762168  | 2,759   | 0,130  | 4,40 | CRC > NCT | 5,00E-05 | 0,0020443 |
| XLOC_008<br>113 | PDX1                             | chr13:28393269-28500596  | 4,542   | 0,216  | 4,39 | CRC > NCT | 5,00E-05 | 0,0020443 |
| XLOC_013<br>000 | CRAT40                           | chr17:63453459-63462600  | 0,610   | 0,029  | 4,37 | CRC > NCT | 0,0001   | 0,003647  |
| XLOC_026<br>489 | TFAP2A                           | chr6:10396915-10419797   | 2,200   | 0,107  | 4,36 | CRC > NCT | 5,00E-05 | 0,0020443 |
| XLOC_024<br>733 | MSX2                             | chr5:174151574-174157902 | 5,650   | 0,276  | 4,35 | CRC > NCT | 0,0003   | 0,0084946 |
| XLOC_030<br>839 | DEFA6                            | chr8:6782215-6783598     | 80,854  | 4,007  | 4,33 | CRC > NCT | 5,00E-05 | 0,0020443 |
| XLOC_017<br>142 | SP5                              | chr2:171556861-171655481 | 7,923   | 0,395  | 4,33 | CRC > NCT | 0,0005   | 0,0123209 |
| XLOC_019<br>589 | LINC00659                        | chr20:61404039-61408310  | 1,359   | 0,068  | 4,31 | CRC > NCT | 5,00E-05 | 0,0020443 |
| XLOC_025<br>263 | SH3TC2                           | chr5:148361712-148442737 | 0,888   | 0,045  | 4,30 | CRC > NCT | 5,00E-05 | 0,0020443 |

|                 |              |                           |        |       |      |           |          |           |
|-----------------|--------------|---------------------------|--------|-------|------|-----------|----------|-----------|
| XLOC_030<br>739 | POU5F1B      | chr8:128256407-128507161  | 9,277  | 0,475 | 4,29 | CRC > NCT | 5,00E-05 | 0,0020443 |
| XLOC_007<br>721 | TESC         | chr12:117476527-117579294 | 67,536 | 3,472 | 4,28 | CRC > NCT | 5,00E-05 | 0,0020443 |
| XLOC_005<br>761 | TCN1         | chr11:59620271-59634041   | 46,047 | 2,404 | 4,26 | CRC > NCT | 0,00085  | 0,0178569 |
| XLOC_016<br>313 | IL11         | chr19:55875749-55881831   | 1,890  | 0,102 | 4,21 | CRC > NCT | 5,00E-05 | 0,0020443 |
| XLOC_006<br>117 | TMPRSS13     | chr11:117771171-117800168 | 4,286  | 0,233 | 4,20 | CRC > NCT | 5,00E-05 | 0,0020443 |
| XLOC_006<br>819 | LGR5         | chr12:71831460-71980320   | 12,182 | 0,670 | 4,19 | CRC > NCT | 5,00E-05 | 0,0020443 |
| XLOC_016<br>300 | TNNT1        | chr19:55644065-55660722   | 6,595  | 0,363 | 4,18 | CRC > NCT | 5,00E-05 | 0,0020443 |
| XLOC_017<br>295 | CPS1         | chr2:211342405-211543857  | 13,797 | 0,764 | 4,17 | CRC > NCT | 0,00065  | 0,0147056 |
| XLOC_020<br>602 | TMEM211      | chr22:25331035-25342703   | 6,985  | 0,391 | 4,16 | CRC > NCT | 5,00E-05 | 0,0020443 |
| XLOC_010<br>527 | ACAN         | chr15:89346673-89418585   | 0,327  | 0,018 | 4,15 | CRC > NCT | 5,00E-05 | 0,0020443 |
| XLOC_031<br>797 | PSAT1        | chr9:80911990-80945009    | 33,833 | 1,934 | 4,13 | CRC > NCT | 5,00E-05 | 0,0020443 |
| XLOC_001<br>132 | PKP1         | chr1:201252579-201302121  | 2,332  | 0,134 | 4,13 | CRC > NCT | 0,00155  | 0,0273878 |
| XLOC_023<br>367 | PPP2R2C      | chr4:6322304-6565327      | 1,473  | 0,084 | 4,13 | CRC > NCT | 5,00E-05 | 0,0020443 |
| XLOC_003<br>626 | ABCC2        | chr10:101542354-101613399 | 1,964  | 0,113 | 4,12 | CRC > NCT | 5,00E-05 | 0,0020443 |
| XLOC_014<br>369 | SERPINB5     | chr18:61144143-61172320   | 59,412 | 3,517 | 4,08 | CRC > NCT | 5,00E-05 | 0,0020443 |
| XLOC_001<br>329 | RYR2         | chr1:237205701-237997371  | 0,659  | 0,039 | 4,07 | CRC > NCT | 0,00035  | 0,0094833 |
| XLOC_034<br>013 | HS6ST2       | chrX:131760037-132095423  | 2,513  | 0,150 | 4,07 | CRC > NCT | 5,00E-05 | 0,0020443 |
| XLOC_024<br>706 | GABRP        | chr5:170196700-170241321  | 2,799  | 0,167 | 4,07 | CRC > NCT | 5,00E-05 | 0,0020443 |
| XLOC_025<br>356 | STC2         | chr5:172741721-172756506  | 5,941  | 0,355 | 4,07 | CRC > NCT | 0,0004   | 0,01042   |
| XLOC_012<br>105 | CRNDE        | chr16:54951584-54963101   | 5,044  | 0,305 | 4,05 | CRC > NCT | 5,00E-05 | 0,0020443 |
| XLOC_001<br>872 | LOC101926964 | chr1:61121215-61292252    | 0,540  | 0,033 | 4,04 | CRC > NCT | 0,00045  | 0,0114127 |
| XLOC_027<br>126 | PDE10A       | chr6:165740775-166078124  | 2,151  | 0,130 | 4,04 | CRC > NCT | 5,00E-05 | 0,0020443 |
| XLOC_033<br>903 | NXF3         | chrX:102330722-102348087  | 2,913  | 0,179 | 4,02 | CRC > NCT | 0,00025  | 0,0074979 |
| XLOC_017<br>934 | IL1A         | chr2:113531491-113542971  | 3,984  | 0,249 | 4,00 | CRC > NCT | 0,0001   | 0,003647  |
| XLOC_016<br>013 | CNTD2        | chr19:40728114-40732616   | 3,632  | 0,227 | 4,00 | CRC > NCT | 5,00E-05 | 0,0020443 |
| XLOC_016<br>591 | C2orf70      | chr2:26785352-26864211    | 4,441  | 0,279 | 3,99 | CRC > NCT | 0,00015  | 0,0050841 |
| XLOC_019<br>540 | SALL4        | chr20:50398886-50419048   | 0,429  | 0,027 | 3,99 | CRC > NCT | 5,00E-05 | 0,0020443 |
| XLOC_012<br>531 | DNAH2        | chr17:7620671-7737062     | 0,422  | 0,027 | 3,98 | CRC > NCT | 5,00E-05 | 0,0020443 |
| XLOC_007<br>248 | GRIN2B       | chr12:13709027-14134950   | 0,727  | 0,046 | 3,97 | CRC > NCT | 0,0001   | 0,003647  |
| XLOC_010<br>348 | C2CD4A       | chr15:62358652-62364359   | 6,997  | 0,448 | 3,97 | CRC > NCT | 0,0001   | 0,003647  |
| XLOC_019<br>588 | SLCO4A1-AS1  | chr20:61268734-61304370   | 6,558  | 0,438 | 3,91 | CRC > NCT | 0,00335  | 0,0457925 |
| XLOC_000<br>283 | OPRD1        | chr1:29138653-29197772    | 0,325  | 0,022 | 3,88 | CRC > NCT | 0,00265  | 0,0390961 |
| XLOC_033<br>407 | TDGF1P3      | chrX:109763539-109766249  | 0,718  | 0,049 | 3,87 | CRC > NCT | 0,00095  | 0,0192909 |
| XLOC_015<br>473 | LAIR2        | chr19:55014012-55021902   | 2,604  | 0,179 | 3,86 | CRC > NCT | 0,00175  | 0,0294656 |
| XLOC_026<br>449 | -            | chr6:1283949-1289156      | 0,533  | 0,038 | 3,82 | CRC > NCT | 0,0005   | 0,0123209 |
| XLOC_003<br>790 | VENTX        | chr10:135051407-135055434 | 3,735  | 0,266 | 3,81 | CRC > NCT | 0,00295  | 0,0419277 |
| XLOC_007<br>366 | DDN          | chr12:49388932-49393088   | 0,460  | 0,033 | 3,78 | CRC > NCT | 0,00055  | 0,0131101 |
| XLOC_030<br>971 | DUSP4        | chr8:29190578-29208267    | 17,302 | 1,258 | 3,78 | CRC > NCT | 5,00E-05 | 0,0020443 |

|                 |              |                           |        |       |      |           |          |           |
|-----------------|--------------|---------------------------|--------|-------|------|-----------|----------|-----------|
| XLOC_034<br>008 | FIRRE        | chrX:130823786-130964861  | 0,678  | 0,051 | 3,74 | CRC > NCT | 0,0002   | 0,006387  |
| XLOC_014<br>314 | SLC14A1      | chr18:43303900-43332485   | 7,830  | 0,590 | 3,73 | CRC > NCT | 5,00E-05 | 0,0020443 |
| XLOC_017<br>884 | CREG2        | chr2:101962347-102003965  | 0,675  | 0,051 | 3,73 | CRC > NCT | 0,0001   | 0,003647  |
| XLOC_023<br>072 | SPP1         | chr4:88896801-88904563    | 64,141 | 4,945 | 3,70 | CRC > NCT | 5,00E-05 | 0,0020443 |
| XLOC_005<br>883 | SPTBN2       | chr11:66449971-66496260   | 3,358  | 0,264 | 3,67 | CRC > NCT | 5,00E-05 | 0,0020443 |
| XLOC_004<br>613 | BRSK2        | chr11:1411128-1483951     | 0,731  | 0,059 | 3,64 | CRC > NCT | 5,00E-05 | 0,0020443 |
| XLOC_010<br>780 | WDR72        | chr15:53805937-54055075   | 4,619  | 0,374 | 3,63 | CRC > NCT | 0,00015  | 0,0050841 |
| XLOC_026<br>807 | PTCHD4       | chr6:47845172-48079148    | 0,955  | 0,077 | 3,62 | CRC > NCT | 0,0008   | 0,0171221 |
| XLOC_003<br>414 | DKK1         | chr10:54074040-54077417   | 2,951  | 0,242 | 3,61 | CRC > NCT | 5,00E-05 | 0,0020443 |
| XLOC_017<br>908 | EDAR         | chr2:109510903-109605828  | 3,127  | 0,257 | 3,60 | CRC > NCT | 5,00E-05 | 0,0020443 |
| XLOC_006<br>052 | MMP1         | chr11:102654406-102714342 | 49,959 | 4,160 | 3,59 | CRC > NCT | 5,00E-05 | 0,0020443 |
| XLOC_009<br>499 | AJUBA        | chr14:23440327-23451851   | 4,123  | 0,347 | 3,57 | CRC > NCT | 5,00E-05 | 0,0020443 |
| XLOC_011<br>770 | CPNE7        | chr16:89642175-89663656   | 4,226  | 0,360 | 3,55 | CRC > NCT | 5,00E-05 | 0,0020443 |
| XLOC_019<br>273 | SLC4A11      | chr20:3207370-3220240     | 2,764  | 0,236 | 3,55 | CRC > NCT | 5,00E-05 | 0,0020443 |
| XLOC_006<br>671 | KRT7         | chr12:52623786-52761309   | 5,582  | 0,482 | 3,53 | CRC > NCT | 0,00125  | 0,0233782 |
| XLOC_013<br>521 | KRT40        | chr17:39133967-39143400   | 2,125  | 0,186 | 3,51 | CRC > NCT | 0,00065  | 0,0147056 |
| XLOC_017<br>426 | FAM132B      | chr2:239066272-239077532  | 0,720  | 0,063 | 3,51 | CRC > NCT | 0,0012   | 0,0226522 |
| XLOC_019<br>824 | -            | chr21:40358073-40396564   | 0,745  | 0,067 | 3,47 | CRC > NCT | 0,00245  | 0,0372298 |
| XLOC_000<br>488 | PCSK9        | chr1:55504991-55683128    | 10,917 | 0,991 | 3,46 | CRC > NCT | 0,0017   | 0,0290257 |
| XLOC_025<br>013 | FOXD1        | chr5:72742084-72744352    | 1,404  | 0,128 | 3,45 | CRC > NCT | 0,0028   | 0,0405866 |
| XLOC_004<br>105 | MAT1A        | chr10:82031573-82049434   | 1,019  | 0,093 | 3,45 | CRC > NCT | 0,0003   | 0,0084946 |
| XLOC_029<br>235 | SMKR1,STRIP2 | chr7:129074244-129152773  | 3,223  | 0,295 | 3,45 | CRC > NCT | 0,00015  | 0,0050841 |
| XLOC_033<br>995 | APLN         | chrX:128779235-128788933  | 2,951  | 0,271 | 3,44 | CRC > NCT | 0,0009   | 0,0185023 |
| XLOC_004<br>725 | RASSF10      | chr11:13030872-13036667   | 1,273  | 0,117 | 3,44 | CRC > NCT | 0,00075  | 0,0164378 |
| XLOC_023<br>477 | ERVMER34-1   | chr4:53607394-53617807    | 0,757  | 0,070 | 3,44 | CRC > NCT | 5,00E-05 | 0,0020443 |
| XLOC_033<br>710 | NDP          | chrX:43808022-43832921    | 0,831  | 0,077 | 3,43 | CRC > NCT | 0,0013   | 0,0239449 |
| XLOC_034<br>342 | -            | chrX:154044931-154045568  | 3,954  | 0,373 | 3,41 | CRC > NCT | 0,0009   | 0,0185023 |
| XLOC_009<br>622 | -            | chr14:54064707-54081120   | 1,537  | 0,148 | 3,38 | CRC > NCT | 0,0003   | 0,0084946 |
| XLOC_031<br>244 | SNTB1        | chr8:121547776-121826228  | 7,197  | 0,692 | 3,38 | CRC > NCT | 5,00E-05 | 0,0020443 |
| XLOC_017<br>227 | SLC39A10     | chr2:196477774-196933571  | 6,023  | 0,582 | 3,37 | CRC > NCT | 0,00065  | 0,0147056 |
| XLOC_003<br>736 | BTBD16       | chr10:124030820-124097838 | 1,113  | 0,108 | 3,36 | CRC > NCT | 0,0002   | 0,006387  |
| XLOC_019<br>555 | BMP7         | chr20:55743758-55841716   | 8,442  | 0,820 | 3,36 | CRC > NCT | 5,00E-05 | 0,0020443 |
| XLOC_003<br>788 | KNDC1        | chr10:134973862-135039916 | 0,497  | 0,049 | 3,33 | CRC > NCT | 0,00175  | 0,0294656 |
| XLOC_012<br>272 | SLC7A5       | chr16:87863623-87903100   | 27,237 | 2,704 | 3,33 | CRC > NCT | 5,00E-05 | 0,0020443 |
| XLOC_024<br>949 | MCIDAS       | chr5:54513301-54523165    | 0,380  | 0,038 | 3,32 | CRC > NCT | 0,0026   | 0,0386713 |
| XLOC_029<br>921 | KIAA1549     | chr7:138516119-138666064  | 1,510  | 0,152 | 3,31 | CRC > NCT | 5,00E-05 | 0,0020443 |
| XLOC_002<br>207 | S100A2       | chr1:153533584-153541068  | 9,548  | 0,972 | 3,30 | CRC > NCT | 5,00E-05 | 0,0020443 |
| XLOC_015<br>086 | HPN          | chr19:35531409-35604714   | 5,405  | 0,553 | 3,29 | CRC > NCT | 0,00055  | 0,0131101 |

|                 |              |                           |         |        |      |           |          |           |
|-----------------|--------------|---------------------------|---------|--------|------|-----------|----------|-----------|
| XLOC_024<br>179 | NKD2         | chr5:1008927-1040830      | 5,616   | 0,583  | 3,27 | CRC > NCT | 5,00E-05 | 0,0020443 |
| XLOC_030<br>850 | DEFA5        | chr8:6912821-6914261      | 143,332 | 14,993 | 3,26 | CRC > NCT | 5,00E-05 | 0,0020443 |
| XLOC_015<br>007 | GDF15        | chr19:18493011-18500739   | 220,427 | 23,087 | 3,26 | CRC > NCT | 5,00E-05 | 0,0020443 |
| XLOC_013<br>507 | TNS4         | chr17:38621719-38657909   | 24,283  | 2,545  | 3,25 | CRC > NCT | 5,00E-05 | 0,0020443 |
| XLOC_005<br>455 | ASCL2        | chr11:2289519-2295262     | 43,198  | 4,528  | 3,25 | CRC > NCT | 5,00E-05 | 0,0020443 |
| XLOC_023<br>716 | SLC7A11      | chr4:138948576-139163824  | 4,197   | 0,445  | 3,24 | CRC > NCT | 0,0001   | 0,003647  |
| XLOC_023<br>487 | NMU          | chr4:56461395-56502865    | 13,532  | 1,440  | 3,23 | CRC > NCT | 0,0005   | 0,0123209 |
| XLOC_019<br>203 | COL9A3       | chr20:61448113-61493115   | 14,798  | 1,584  | 3,22 | CRC > NCT | 0,00045  | 0,0114127 |
| XLOC_032<br>392 | SLC28A3      | chr9:86885662-86983440    | 1,290   | 0,141  | 3,20 | CRC > NCT | 5,00E-05 | 0,0020443 |
| XLOC_024<br>287 | ITGA2        | chr5:52285115-52410959    | 9,311   | 1,021  | 3,19 | CRC > NCT | 0,0037   | 0,0490331 |
| XLOC_007<br>555 | PHLDA1       | chr12:76419192-76435278   | 40,451  | 4,460  | 3,18 | CRC > NCT | 5,00E-05 | 0,0020443 |
| XLOC_018<br>853 | TRIB3        | chr20:361272-378203       | 33,814  | 3,793  | 3,16 | CRC > NCT | 5,00E-05 | 0,0020443 |
| XLOC_021<br>076 | TDGF1        | chr3:46552180-46624005    | 8,312   | 0,953  | 3,13 | CRC > NCT | 0,00105  | 0,0206545 |
| XLOC_029<br>940 | CLECSA       | chr7:141627156-141647022  | 1,169   | 0,135  | 3,11 | CRC > NCT | 0,00055  | 0,0131101 |
| XLOC_007<br>560 | E2F7         | chr12:77413513-77459360   | 1,257   | 0,145  | 3,11 | CRC > NCT | 0,00055  | 0,0131101 |
| XLOC_016<br>164 | FUT1         | chr19:49251267-49258647   | 1,398   | 0,167  | 3,07 | CRC > NCT | 0,0013   | 0,0239449 |
| XLOC_000<br>261 | TRNP1        | chr1:27320152-27329011    | 7,834   | 0,936  | 3,06 | CRC > NCT | 0,0001   | 0,003647  |
| XLOC_031<br>239 | TNFRSF11B    | chr8:119935795-119964407  | 14,019  | 1,719  | 3,03 | CRC > NCT | 5,00E-05 | 0,0020443 |
| XLOC_007<br>255 | ERP27        | chr12:15066893-15091483   | 12,039  | 1,511  | 2,99 | CRC > NCT | 0,00015  | 0,0050841 |
| XLOC_006<br>146 | TRIM29       | chr11:119981991-120008863 | 32,101  | 4,057  | 2,98 | CRC > NCT | 5,00E-05 | 0,0020443 |
| XLOC_006<br>097 | TMPRSS5      | chr11:113533115-113577144 | 1,711   | 0,218  | 2,97 | CRC > NCT | 0,0003   | 0,0084946 |
| XLOC_014<br>829 | TNFSF9       | chr19:6531009-6536166     | 10,811  | 1,378  | 2,97 | CRC > NCT | 0,0017   | 0,0290257 |
| XLOC_031<br>100 | SBSPON       | chr8:73969956-74005642    | 3,987   | 0,512  | 2,96 | CRC > NCT | 5,00E-05 | 0,0020443 |
| XLOC_008<br>571 | DACH1        | chr13:72010961-72463132   | 5,936   | 0,763  | 2,96 | CRC > NCT | 5,00E-05 | 0,0020443 |
| XLOC_030<br>992 | LINC01605    | chr8:37261041-37411742    | 9,502   | 1,226  | 2,95 | CRC > NCT | 0,0003   | 0,0084946 |
| XLOC_020<br>965 | KCNH8        | chr3:19189952-19577973    | 1,246   | 0,162  | 2,94 | CRC > NCT | 0,0002   | 0,006387  |
| XLOC_008<br>489 | VWA8         | chr13:42140733-42555701   | 19,197  | 2,504  | 2,94 | CRC > NCT | 5,00E-05 | 0,0020443 |
| XLOC_021<br>212 | ROBO2        | chr3:77089293-77699114    | 0,466   | 0,061  | 2,93 | CRC > NCT | 0,00025  | 0,0074979 |
| XLOC_023<br>171 | HSPA4L       | chr4:128703424-128762402  | 3,380   | 0,453  | 2,90 | CRC > NCT | 0,0001   | 0,003647  |
| XLOC_000<br>285 | PTPRU        | chr1:29563027-29653325    | 3,534   | 0,475  | 2,89 | CRC > NCT | 0,0004   | 0,01042   |
| XLOC_017<br>637 | LOC102723854 | chr2:43192835-43266845    | 7,988   | 1,078  | 2,89 | CRC > NCT | 0,0009   | 0,0185023 |
| XLOC_001<br>638 | NROB2        | chr1:27237974-27240567    | 3,431   | 0,463  | 2,89 | CRC > NCT | 0,0008   | 0,0171221 |
| XLOC_020<br>278 | RAB36        | chr22:23487512-23507802   | 1,715   | 0,232  | 2,88 | CRC > NCT | 0,0003   | 0,0084946 |
| XLOC_026<br>125 | EVADR        | chr6:71093877-71109159    | 38,742  | 5,277  | 2,88 | CRC > NCT | 0,0005   | 0,0123209 |
| XLOC_007<br>509 | PPM1H        | chr12:63037601-63328665   | 5,706   | 0,785  | 2,86 | CRC > NCT | 5,00E-05 | 0,0020443 |
| XLOC_016<br>553 | MYCN         | chr2:16076386-16087129    | 1,141   | 0,158  | 2,86 | CRC > NCT | 0,0013   | 0,0239449 |
| XLOC_023<br>529 | CXCL5        | chr4:74861358-74864446    | 12,056  | 1,676  | 2,85 | CRC > NCT | 0,00245  | 0,0372298 |
| XLOC_032<br>530 | RNF183       | chr9:116059372-116065415  | 3,699   | 0,521  | 2,83 | CRC > NCT | 0,00015  | 0,0050841 |



|                 |              |                           |         |         |      |           |          |           |
|-----------------|--------------|---------------------------|---------|---------|------|-----------|----------|-----------|
| XLOC_015<br>692 | PRR36        | chr19:7933475-7939326     | 0,953   | 0,135   | 2,82 | CRC > NCT | 0,00045  | 0,0114127 |
| XLOC_030<br>790 | MAPK15       | chr8:144797933-144804633  | 1,231   | 0,174   | 2,82 | CRC > NCT | 0,00225  | 0,0351876 |
| XLOC_008<br>363 | ATP11A       | chr13:113344308-113541526 | 4,880   | 0,717   | 2,77 | CRC > NCT | 0,0003   | 0,0084946 |
| XLOC_031<br>090 | SLCO5A1      | chr8:70579285-70750023    | 0,447   | 0,066   | 2,77 | CRC > NCT | 0,00025  | 0,0074979 |
| XLOC_020<br>285 | MMP11        | chr22:24113368-24126509   | 15,529  | 2,367   | 2,71 | CRC > NCT | 5,00E-05 | 0,0020443 |
| XLOC_029<br>922 | ZC3HAV1L     | chr7:138706249-138721778  | 3,875   | 0,593   | 2,71 | CRC > NCT | 0,00115  | 0,0220507 |
| XLOC_011<br>615 | LRR36        | chr16:67360746-67419524   | 1,134   | 0,175   | 2,70 | CRC > NCT | 0,0011   | 0,0213843 |
| XLOC_033<br>636 | ASB9         | chrX:15262108-15288589    | 6,553   | 1,011   | 2,70 | CRC > NCT | 5,00E-05 | 0,0020443 |
| XLOC_020<br>319 | ZNRF3        | chr22:29279754-29453476   | 4,185   | 0,649   | 2,69 | CRC > NCT | 5,00E-05 | 0,0020443 |
| XLOC_002<br>473 | KIF14        | chr1:200520624-200589862  | 1,757   | 0,274   | 2,68 | CRC > NCT | 0,00025  | 0,0074979 |
| XLOC_032<br>211 | CDKN2A       | chr9:21967137-21994610    | 9,631   | 1,514   | 2,67 | CRC > NCT | 0,00095  | 0,0192909 |
| XLOC_032<br>174 | FREM1        | chr9:14734663-14910993    | 3,618   | 0,584   | 2,63 | CRC > NCT | 0,00215  | 0,0341212 |
| XLOC_002<br>097 | REG4         | chr1:120336640-120355341  | 973,767 | 158,797 | 2,62 | CRC > NCT | 5,00E-05 | 0,0020443 |
| XLOC_017<br>756 | FBXO41       | chr2:73481071-73513456    | 1,357   | 0,224   | 2,60 | CRC > NCT | 0,0029   | 0,0416718 |
| XLOC_029<br>960 | FAM131B      | chr7:143013218-143059840  | 0,864   | 0,144   | 2,59 | CRC > NCT | 0,00115  | 0,0220507 |
| XLOC_020<br>782 | CELSR1       | chr22:46754006-46933067   | 2,610   | 0,435   | 2,59 | CRC > NCT | 0,00105  | 0,0206545 |
| XLOC_006<br>647 | ASIC1        | chr12:50451109-50477544   | 2,575   | 0,430   | 2,58 | CRC > NCT | 0,0006   | 0,0139198 |
| XLOC_016<br>557 | VSNL1        | chr2:17719277-17837706    | 10,279  | 1,728   | 2,57 | CRC > NCT | 5,00E-05 | 0,0020443 |
| XLOC_019<br>271 | LZTS3        | chr20:3143262-3154238     | 7,539   | 1,276   | 2,56 | CRC > NCT | 5,00E-05 | 0,0020443 |
| XLOC_020<br>950 | SLC6A6       | chr3:14444065-14644479    | 10,530  | 1,800   | 2,55 | CRC > NCT | 0,00025  | 0,0074979 |
| XLOC_025<br>036 | HOMER1       | chr5:78668510-78810251    | 1,655   | 0,283   | 2,55 | CRC > NCT | 0,0038   | 0,049887  |
| XLOC_011<br>849 | PRSS33       | chr16:2833951-2837684     | 2,366   | 0,405   | 2,55 | CRC > NCT | 0,00235  | 0,0361928 |
| XLOC_021<br>541 | ECT2         | chr3:172468474-172539277  | 19,961  | 3,538   | 2,50 | CRC > NCT | 5,00E-05 | 0,0020443 |
| XLOC_013<br>794 | AXIN2        | chr17:63524677-63557745   | 32,673  | 5,808   | 2,49 | CRC > NCT | 5,00E-05 | 0,0020443 |
| XLOC_026<br>402 | SLC22A3      | chr6:160769359-160880191  | 6,391   | 1,137   | 2,49 | CRC > NCT | 0,00045  | 0,0114127 |
| XLOC_032<br>238 | AQP3         | chr9:33441143-33447631    | 32,604  | 5,858   | 2,48 | CRC > NCT | 5,00E-05 | 0,0020443 |
| XLOC_006<br>574 | ARNTL2,SMCO2 | chr12:27485786-27655165   | 4,127   | 0,751   | 2,46 | CRC > NCT | 5,00E-05 | 0,0020443 |
| XLOC_030<br>012 | XRCC2        | chr7:152338500-152373250  | 1,042   | 0,191   | 2,45 | CRC > NCT | 0,001    | 0,0199726 |
| XLOC_017<br>157 | CDCA7        | chr2:174192078-174233718  | 38,359  | 7,068   | 2,44 | CRC > NCT | 5,00E-05 | 0,0020443 |
| XLOC_014<br>812 | UHRF1        | chr19:4903091-4962630     | 3,120   | 0,577   | 2,44 | CRC > NCT | 0,0002   | 0,006387  |
| XLOC_003<br>464 | PALD1        | chr10:72237661-72328207   | 8,821   | 1,635   | 2,43 | CRC > NCT | 5,00E-05 | 0,0020443 |
| XLOC_030<br>455 | FZD3         | chr8:28351721-28432056    | 3,853   | 0,718   | 2,42 | CRC > NCT | 0,00225  | 0,0351876 |
| XLOC_018<br>891 | SMOX         | chr20:4129425-4168411     | 9,727   | 1,823   | 2,42 | CRC > NCT | 5,00E-05 | 0,0020443 |
| XLOC_028<br>881 | ANLN         | chr7:36363574-36493401    | 11,591  | 2,181   | 2,41 | CRC > NCT | 0,0009   | 0,0185023 |
| XLOC_006<br>592 | BICD1        | chr12:32259615-32536558   | 2,526   | 0,478   | 2,40 | CRC > NCT | 0,001    | 0,0199726 |
| XLOC_011<br>778 | MC1R,TUBB3   | chr16:89981505-90002507   | 24,602  | 4,668   | 2,40 | CRC > NCT | 5,00E-05 | 0,0020443 |
| XLOC_011<br>437 | SBK1         | chr16:28303839-28335170   | 0,732   | 0,140   | 2,39 | CRC > NCT | 0,0028   | 0,0405866 |
| XLOC_001<br>229 | PROX1        | chr1:213991105-214214847  | 2,736   | 0,524   | 2,39 | CRC > NCT | 0,0002   | 0,006387  |

|                 |         |                          |         |        |      |           |          |           |
|-----------------|---------|--------------------------|---------|--------|------|-----------|----------|-----------|
| XLOC_021<br>965 | CADPS   | chr3:62384018-62861573   | 5,784   | 1,109  | 2,38 | CRC > NCT | 0,00115  | 0,0220507 |
| XLOC_024<br>507 | SLC12A2 | chr5:127270364-127525691 | 60,888  | 11,779 | 2,37 | CRC > NCT | 5,00E-05 | 0,0020443 |
| XLOC_003<br>883 | NEBL    | chr10:21068900-21464625  | 10,268  | 1,997  | 2,36 | CRC > NCT | 5,00E-05 | 0,0020443 |
| XLOC_019<br>982 | URB1    | chr21:33653321-33765312  | 2,968   | 0,580  | 2,36 | CRC > NCT | 0,00025  | 0,0074979 |
| XLOC_023<br>489 | PPAT    | chr4:57259526-57301802   | 5,407   | 1,070  | 2,34 | CRC > NCT | 5,00E-05 | 0,0020443 |
| XLOC_003<br>585 | CEP55   | chr10:95256358-95290536  | 17,203  | 3,420  | 2,33 | CRC > NCT | 5,00E-05 | 0,0020443 |
| XLOC_029<br>218 | HILPDA  | chr7:128092260-128110518 | 21,893  | 4,398  | 2,32 | CRC > NCT | 0,00055  | 0,0131101 |
| XLOC_017<br>411 | SH3BP4  | chr2:235860627-235964432 | 9,638   | 1,942  | 2,31 | CRC > NCT | 0,0011   | 0,0213843 |
| XLOC_029<br>778 | TFR2    | chr7:100218038-100239351 | 1,106   | 0,223  | 2,31 | CRC > NCT | 0,00145  | 0,0259223 |
| XLOC_010<br>513 | ALPK3   | chr15:85359910-85416793  | 2,278   | 0,461  | 2,31 | CRC > NCT | 0,00175  | 0,0294656 |
| XLOC_019<br>198 | SLCO4A1 | chr20:61268734-61304370  | 12,880  | 2,612  | 2,30 | CRC > NCT | 0,00025  | 0,0074979 |
| XLOC_003<br>264 | MCM10   | chr10:13203553-13253191  | 2,648   | 0,540  | 2,30 | CRC > NCT | 0,00025  | 0,0074979 |
| XLOC_029<br>781 | EPHB4   | chr7:100399470-100425986 | 22,419  | 4,582  | 2,29 | CRC > NCT | 5,00E-05 | 0,0020443 |
| XLOC_031<br>107 | JPH1    | chr8:75146933-75233713   | 7,069   | 1,449  | 2,29 | CRC > NCT | 0,0001   | 0,003647  |
| XLOC_028<br>820 | STK31   | chr7:23749785-23872130   | 0,878   | 0,183  | 2,26 | CRC > NCT | 0,0016   | 0,0279196 |
| XLOC_030<br>690 | CTHRC1  | chr8:104373819-104395232 | 16,443  | 3,435  | 2,26 | CRC > NCT | 0,0013   | 0,0239449 |
| XLOC_017<br>933 | CKAP2L  | chr2:113483689-113522254 | 3,204   | 0,671  | 2,26 | CRC > NCT | 0,00015  | 0,0050841 |
| XLOC_009<br>625 | BMP4    | chr14:54416454-54423554  | 37,571  | 7,887  | 2,25 | CRC > NCT | 5,00E-05 | 0,0020443 |
| XLOC_001<br>231 | CENPF   | chr1:214776419-214842730 | 6,583   | 1,387  | 2,25 | CRC > NCT | 5,00E-05 | 0,0020443 |
| XLOC_003<br>955 | ZNF239  | chr10:44050417-44070189  | 3,139   | 0,662  | 2,24 | CRC > NCT | 0,00095  | 0,0192909 |
| XLOC_026<br>346 | SAMD5   | chr6:147829762-147891425 | 7,519   | 1,594  | 2,24 | CRC > NCT | 5,00E-05 | 0,0020443 |
| XLOC_034<br>002 | ZNF280C | chrX:129330297-129402922 | 1,106   | 0,235  | 2,24 | CRC > NCT | 0,0031   | 0,0433833 |
| XLOC_017<br>935 | IL1B    | chr2:113587321-113624193 | 113,147 | 24,023 | 2,24 | CRC > NCT | 0,0002   | 0,006387  |
| XLOC_024<br>533 | TCF7    | chr5:133450401-133488751 | 10,638  | 2,296  | 2,21 | CRC > NCT | 5,00E-05 | 0,0020443 |
| XLOC_025<br>793 | SOX4    | chr6:21589689-21602655   | 23,560  | 5,116  | 2,20 | CRC > NCT | 5,00E-05 | 0,0020443 |
| XLOC_029<br>658 | STX1A   | chr7:73113533-73134017   | 4,068   | 0,885  | 2,20 | CRC > NCT | 0,0007   | 0,0155855 |
| XLOC_026<br>363 | MTHFD1L | chr6:151186814-151423322 | 16,384  | 3,578  | 2,19 | CRC > NCT | 0,0003   | 0,0084946 |
| XLOC_015<br>315 | SULT2B1 | chr19:49055410-49102686  | 19,507  | 4,289  | 2,19 | CRC > NCT | 0,0006   | 0,0139198 |
| XLOC_005<br>176 | DDIAS   | chr11:82612736-82645700  | 2,613   | 0,575  | 2,18 | CRC > NCT | 0,0008   | 0,0171221 |
| XLOC_030<br>452 | ESCO2   | chr8:27632057-27662607   | 4,438   | 0,980  | 2,18 | CRC > NCT | 0,00045  | 0,0114127 |
| XLOC_000<br>742 | PHGDH   | chr1:120204832-120286850 | 39,124  | 8,686  | 2,17 | CRC > NCT | 0,00015  | 0,0050841 |
| XLOC_018<br>885 | CDC25B  | chr20:3767358-3786787    | 39,682  | 8,811  | 2,17 | CRC > NCT | 5,00E-05 | 0,0020443 |
| XLOC_033<br>756 | SHROOM4 | chrX:50329787-50557283   | 1,937   | 0,430  | 2,17 | CRC > NCT | 0,0005   | 0,0123209 |
| XLOC_019<br>604 | SRMS    | chr20:62169669-62180512  | 4,187   | 0,939  | 2,16 | CRC > NCT | 0,0009   | 0,0185023 |
| XLOC_016<br>887 | NCAPH   | chr2:97001478-97042833   | 6,564   | 1,474  | 2,15 | CRC > NCT | 0,0004   | 0,01042   |
| XLOC_003<br>396 | ZNF488  | chr10:48333006-48373867  | 1,144   | 0,257  | 2,15 | CRC > NCT | 0,00325  | 0,0448628 |
| XLOC_030<br>782 | RHPN1   | chr8:144451009-144466392 | 4,597   | 1,047  | 2,13 | CRC > NCT | 0,0001   | 0,003647  |
| XLOC_001<br>148 | LGR6    | chr1:202162918-202290712 | 3,229   | 0,738  | 2,13 | CRC > NCT | 0,00145  | 0,0259223 |

|                 |                      |                           |         |        |      |           |          |           |
|-----------------|----------------------|---------------------------|---------|--------|------|-----------|----------|-----------|
| XLOC_024<br>547 | TGFBI                | chr5:135364583-135399507  | 251,604 | 57,543 | 2,13 | CRC > NCT | 0,0012   | 0,0226522 |
| XLOC_005<br>097 | MYEOV                | chr11:69061543-69187280   | 14,223  | 3,253  | 2,13 | CRC > NCT | 0,00015  | 0,0050841 |
| XLOC_007<br>712 | TBX3                 | chr12:115107940-115121969 | 8,788   | 2,014  | 2,13 | CRC > NCT | 5,00E-05 | 0,0020443 |
| XLOC_031<br>944 | COL27A1              | chr9:116916589-117074800  | 4,724   | 1,083  | 2,13 | CRC > NCT | 0,0002   | 0,006387  |
| XLOC_029<br>814 | PUS7                 | chr7:105096616-105162708  | 6,231   | 1,433  | 2,12 | CRC > NCT | 5,00E-05 | 0,0020443 |
| XLOC_002<br>558 | NEK2                 | chr1:211831598-211849154  | 10,199  | 2,356  | 2,11 | CRC > NCT | 0,0003   | 0,0084946 |
| XLOC_017<br>156 | ZAK                  | chr2:173938337-174146764  | 13,443  | 3,109  | 2,11 | CRC > NCT | 0,00085  | 0,0178569 |
| XLOC_013<br>030 | SOX9                 | chr17:70067124-70173130   | 35,928  | 8,340  | 2,11 | CRC > NCT | 5,00E-05 | 0,0020443 |
| XLOC_029<br>901 | PODXL                | chr7:131184762-131241381  | 12,737  | 2,960  | 2,11 | CRC > NCT | 5,00E-05 | 0,0020443 |
| XLOC_002<br>261 | IQGAP3               | chr1:156495029-156542396  | 5,475   | 1,278  | 2,10 | CRC > NCT | 0,00025  | 0,0074979 |
| XLOC_031<br>057 | CA8                  | chr8:61097823-61194099    | 4,507   | 1,053  | 2,10 | CRC > NCT | 0,00215  | 0,0341212 |
| XLOC_030<br>743 | MIR1204,MIR1207,PVT1 | chr8:128806740-129113502  | 11,875  | 2,778  | 2,10 | CRC > NCT | 0,00255  | 0,0382395 |
| XLOC_023<br>013 | CXCL1                | chr4:74733931-74737633    | 79,540  | 18,677 | 2,09 | CRC > NCT | 0,0005   | 0,0123209 |
| XLOC_031<br>242 | DSCC1                | chr8:120846180-120868207  | 5,339   | 1,264  | 2,08 | CRC > NCT | 0,0009   | 0,0185023 |
| XLOC_028<br>757 | FSCN1                | chr7:5632435-5646307      | 24,151  | 5,722  | 2,08 | CRC > NCT | 5,00E-05 | 0,0020443 |
| XLOC_003<br>592 | HELLS                | chr10:96305523-96373681   | 3,537   | 0,848  | 2,06 | CRC > NCT | 0,0016   | 0,0279196 |
| XLOC_031<br>252 | ATAD2                | chr8:124332089-124428623  | 7,736   | 1,855  | 2,06 | CRC > NCT | 5,00E-05 | 0,0020443 |
| XLOC_030<br>766 | PTP4A3               | chr8:142384460-142517330  | 12,766  | 3,069  | 2,06 | CRC > NCT | 5,00E-05 | 0,0020443 |
| XLOC_008<br>139 | RFC3                 | chr13:34392198-34540695   | 10,938  | 2,640  | 2,05 | CRC > NCT | 0,0021   | 0,0336498 |
| XLOC_018<br>286 | AP1S3                | chr2:224614479-224702688  | 3,857   | 0,931  | 2,05 | CRC > NCT | 0,0005   | 0,0123209 |
| XLOC_026<br>041 | PTK7                 | chr6:43044005-43129458    | 15,655  | 3,781  | 2,05 | CRC > NCT | 5,00E-05 | 0,0020443 |
| XLOC_001<br>713 | CLSPN                | chr1:36186116-36235665    | 1,482   | 0,358  | 2,05 | CRC > NCT | 0,0016   | 0,0279196 |
| XLOC_006<br>432 | TEAD4                | chr12:3065875-3155189     | 11,189  | 2,705  | 2,05 | CRC > NCT | 0,0007   | 0,0155855 |
| XLOC_024<br>707 | RANBP17              | chr5:170288885-170727437  | 1,382   | 0,334  | 2,05 | CRC > NCT | 0,00335  | 0,0457925 |
| XLOC_030<br>441 | CDCA2                | chr8:25316512-25369235    | 4,107   | 0,996  | 2,04 | CRC > NCT | 0,0004   | 0,01042   |
| XLOC_032<br>541 | TNFSF15              | chr9:117546800-117568721  | 3,205   | 0,778  | 2,04 | CRC > NCT | 0,0004   | 0,01042   |
| XLOC_010<br>200 | ARHGAP11A            | chr15:32878335-32932262   | 6,053   | 1,473  | 2,04 | CRC > NCT | 0,0001   | 0,003647  |
| XLOC_013<br>053 | CDR2L                | chr17:72983726-73001894   | 5,094   | 1,241  | 2,04 | CRC > NCT | 0,0007   | 0,0155855 |
| XLOC_029<br>760 | AZGP1                | chr7:99564347-99578379    | 57,697  | 14,144 | 2,03 | CRC > NCT | 0,00055  | 0,0131101 |
| XLOC_033<br>834 | PHKA1                | chrX:71798610-71934157    | 2,665   | 0,655  | 2,02 | CRC > NCT | 0,00175  | 0,0294656 |
| XLOC_020<br>476 | GTSE1                | chr22:46692637-46730114   | 5,373   | 1,324  | 2,02 | CRC > NCT | 0,00035  | 0,0094833 |
| XLOC_018<br>983 | TPX2                 | chr20:30326903-30389606   | 22,832  | 5,927  | 2,02 | CRC > NCT | 5,00E-05 | 0,0020443 |
| XLOC_001<br>338 | EXO1                 | chr1:242011489-242055511  | 3,679   | 0,909  | 2,02 | CRC > NCT | 0,00105  | 0,0206545 |
| XLOC_003<br>476 | DDIT4                | chr10:74033676-74035797   | 139,058 | 34,408 | 2,01 | CRC > NCT | 5,00E-05 | 0,0020443 |
| XLOC_000<br>372 | CTPS1                | chr1:41444970-41478356    | 16,135  | 4,005  | 2,01 | CRC > NCT | 0,0001   | 0,003647  |
| XLOC_016<br>530 | RRM2                 | chr2:10260596-10272759    | 28,711  | 7,219  | 1,99 | CRC > NCT | 5,00E-05 | 0,0020443 |
| XLOC_023<br>806 | AADAT                | chr4:170981372-171011538  | 4,151   | 1,045  | 1,99 | CRC > NCT | 0,0021   | 0,0336498 |
| XLOC_018<br>965 | GIN51                | chr20:25388322-25429677   | 5,608   | 1,412  | 1,99 | CRC > NCT | 0,0005   | 0,0123209 |

|                 |             |                           |        |        |      |           |          |           |
|-----------------|-------------|---------------------------|--------|--------|------|-----------|----------|-----------|
| XLOC_007<br>380 | FAIM2       | chr12:50260678-50297996   | 2,926  | 0,742  | 1,98 | CRC > NCT | 0,0014   | 0,0253013 |
| XLOC_013<br>626 | KIF18B      | chr17:43002078-43025119   | 3,387  | 0,859  | 1,98 | CRC > NCT | 0,002    | 0,03265   |
| XLOC_013<br>505 | TOP2A       | chr17:38544769-38574202   | 23,521 | 6,009  | 1,97 | CRC > NCT | 5,00E-05 | 0,0020443 |
| XLOC_017<br>923 | BUB1        | chr2:111393695-111435684  | 10,833 | 2,776  | 1,96 | CRC > NCT | 0,00015  | 0,0050841 |
| XLOC_033<br>355 | CENPI       | chrX:100353166-100421533  | 1,922  | 0,494  | 1,96 | CRC > NCT | 0,00145  | 0,0259223 |
| XLOC_014<br>360 | PMAIP1      | chr18:57567191-57571544   | 7,009  | 1,802  | 1,96 | CRC > NCT | 0,0024   | 0,0366226 |
| XLOC_006<br>791 | HMGA2       | chr12:66151799-66360389   | 5,173  | 1,334  | 1,96 | CRC > NCT | 0,0018   | 0,0301682 |
| XLOC_005<br>101 | ANO1        | chr11:69812163-70035652   | 7,750  | 2,002  | 1,95 | CRC > NCT | 0,00035  | 0,0094833 |
| XLOC_003<br>425 | CDK1        | chr10:62538088-62561445   | 36,070 | 9,346  | 1,95 | CRC > NCT | 5,00E-05 | 0,0020443 |
| XLOC_030<br>581 | SULF1       | chr8:70378858-70573216    | 17,048 | 4,420  | 1,95 | CRC > NCT | 0,00285  | 0,0411153 |
| XLOC_010<br>286 | SORD        | chr15:45315272-45369368   | 28,499 | 7,423  | 1,94 | CRC > NCT | 5,00E-05 | 0,0020443 |
| XLOC_006<br>918 | PARBPB      | chr12:102513858-102592307 | 5,270  | 1,373  | 1,94 | CRC > NCT | 0,0013   | 0,0239449 |
| XLOC_006<br>784 | XPOT        | chr12:64798152-64844902   | 17,775 | 4,632  | 1,94 | CRC > NCT | 5,00E-05 | 0,0020443 |
| XLOC_014<br>225 | APCDD1      | chr18:10454624-10489932   | 28,592 | 7,493  | 1,93 | CRC > NCT | 0,0036   | 0,0481629 |
| XLOC_015<br>120 | WDR62       | chr19:36545782-36596056   | 1,863  | 0,493  | 1,92 | CRC > NCT | 0,002    | 0,03265   |
| XLOC_030<br>521 | MCM4        | chr8:48872762-48891859    | 24,658 | 6,541  | 1,91 | CRC > NCT | 5,00E-05 | 0,0020443 |
| XLOC_010<br>225 | BUB1B,PAK6  | chr15:40453209-40569689   | 9,323  | 2,484  | 1,91 | CRC > NCT | 5,00E-05 | 0,0020443 |
| XLOC_029<br>499 | OSBPL3      | chr7:24836036-25020200    | 4,755  | 1,268  | 1,91 | CRC > NCT | 0,00015  | 0,0050841 |
| XLOC_018<br>335 | HJURP       | chr2:234745121-234763212  | 7,567  | 2,017  | 1,91 | CRC > NCT | 0,0006   | 0,0139198 |
| XLOC_031<br>171 | FSBP,RAD54B | chr8:95384187-95487343    | 3,684  | 0,984  | 1,91 | CRC > NCT | 0,00235  | 0,0361928 |
| XLOC_030<br>031 | NCAPG2      | chr7:158420869-158497522  | 8,420  | 2,249  | 1,90 | CRC > NCT | 0,00025  | 0,0074979 |
| XLOC_033<br>161 | JADE3       | chrX:46771710-46920641    | 3,492  | 0,933  | 1,90 | CRC > NCT | 0,00095  | 0,0192909 |
| XLOC_002<br>661 | AGT         | chr1:230838271-230850336  | 7,026  | 1,878  | 1,90 | CRC > NCT | 0,0008   | 0,0171221 |
| XLOC_009<br>153 | TTC9        | chr14:71108503-71142077   | 1,549  | 0,414  | 1,90 | CRC > NCT | 0,00375  | 0,0494799 |
| XLOC_031<br>943 | ZNF618      | chr9:116638561-116818992  | 1,458  | 0,391  | 1,90 | CRC > NCT | 0,0027   | 0,0395776 |
| XLOC_023<br>632 | CENPE       | chr4:104026936-104119566  | 2,780  | 0,749  | 1,89 | CRC > NCT | 0,0003   | 0,0084946 |
| XLOC_007<br>139 | FOXM1       | chr12:2945981-2998691     | 15,800 | 4,259  | 1,89 | CRC > NCT | 0,00275  | 0,0400849 |
| XLOC_019<br>301 | FERMT1      | chr20:6040842-6104555     | 22,638 | 6,105  | 1,89 | CRC > NCT | 0,0001   | 0,003647  |
| XLOC_006<br>467 | ENO2        | chr12:7023613-7033271     | 12,054 | 3,260  | 1,89 | CRC > NCT | 0,00025  | 0,0074979 |
| XLOC_023<br>684 | MAD2L1      | chr4:120980578-120991294  | 24,245 | 6,574  | 1,88 | CRC > NCT | 0,00015  | 0,0050841 |
| XLOC_005<br>099 | CCND1       | chr11:69454427-69469393   | 38,559 | 10,471 | 1,88 | CRC > NCT | 5,00E-05 | 0,0020443 |
| XLOC_018<br>176 | PGAP1       | chr2:197697557-197791691  | 2,109  | 0,573  | 1,88 | CRC > NCT | 0,00025  | 0,0074979 |
| XLOC_030<br>150 | -           | chr7:56358509-56359121    | 18,249 | 4,975  | 1,88 | CRC > NCT | 0,00315  | 0,0437473 |
| XLOC_029<br>614 | PSPH        | chr7:56078084-56119268    | 9,952  | 2,713  | 1,88 | CRC > NCT | 0,00025  | 0,0074979 |
| XLOC_032<br>423 | IARS        | chr9:94972489-95056038    | 34,945 | 9,568  | 1,87 | CRC > NCT | 5,00E-05 | 0,0020443 |
| XLOC_014<br>329 | LIPG        | chr18:47086015-47119304   | 6,836  | 1,877  | 1,86 | CRC > NCT | 0,0008   | 0,0171221 |
| XLOC_029<br>603 | GRB10       | chr7:50657759-50861159    | 7,884  | 2,166  | 1,86 | CRC > NCT | 0,0003   | 0,0084946 |
| XLOC_012<br>432 | FAM57A      | chr17:635645-658576       | 14,009 | 3,861  | 1,86 | CRC > NCT | 0,0033   | 0,045347  |

|                 |          |                           |        |        |      |           |          |           |
|-----------------|----------|---------------------------|--------|--------|------|-----------|----------|-----------|
| XLOC_018<br>909 | PLCB4    | chr20:9049437-9461882     | 27,343 | 7,541  | 1,86 | CRC > NCT | 0,00235  | 0,0361928 |
| XLOC_023<br>606 | TSPAN5   | chr4:99391514-99579812    | 6,767  | 1,867  | 1,86 | CRC > NCT | 0,00065  | 0,0147056 |
| XLOC_029<br>695 | SEMA3A   | chr7:83584903-83946127    | 1,911  | 0,529  | 1,85 | CRC > NCT | 0,0025   | 0,037738  |
| XLOC_033<br>736 | SLC38A5  | chrX:48316919-48328644    | 22,241 | 6,165  | 1,85 | CRC > NCT | 5,00E-05 | 0,0020443 |
| XLOC_004<br>326 | MKI67    | chr10:129892992-129924643 | 10,334 | 2,882  | 1,84 | CRC > NCT | 5,00E-05 | 0,0020443 |
| XLOC_026<br>153 | TTK      | chr6:80714282-80753285    | 7,087  | 1,977  | 1,84 | CRC > NCT | 0,00055  | 0,0131101 |
| XLOC_029<br>007 | GTF2IRD1 | chr7:73868119-74017019    | 16,350 | 4,563  | 1,84 | CRC > NCT | 0,00175  | 0,0294656 |
| XLOC_000<br>984 | NUF2     | chr1:163291722-163325553  | 9,859  | 2,756  | 1,84 | CRC > NCT | 0,00105  | 0,0206545 |
| XLOC_033<br>924 | MORC4    | chrX:106182384-106243500  | 11,041 | 3,088  | 1,84 | CRC > NCT | 5,00E-05 | 0,0020443 |
| XLOC_006<br>539 | PTPRO    | chr12:15475190-15751265   | 9,769  | 2,735  | 1,84 | CRC > NCT | 0,0011   | 0,0213843 |
| XLOC_017<br>534 | WDR35    | chr2:20110022-20189913    | 2,600  | 0,731  | 1,83 | CRC > NCT | 0,00165  | 0,0284652 |
| XLOC_029<br>008 | GTF2I    | chr7:74071990-74175022    | 11,817 | 3,357  | 1,82 | CRC > NCT | 0,00205  | 0,0331105 |
| XLOC_012<br>788 | FKBP10   | chr17:39958134-39979469   | 41,863 | 11,958 | 1,81 | CRC > NCT | 0,0027   | 0,0395776 |
| XLOC_033<br>583 | DKC1     | chrX:153991016-154005965  | 48,998 | 14,054 | 1,80 | CRC > NCT | 5,00E-05 | 0,0020443 |
| XLOC_001<br>297 | URB2     | chr1:229761837-229796878  | 3,620  | 1,040  | 1,80 | CRC > NCT | 0,0026   | 0,0386713 |
| XLOC_006<br>440 | RAD51AP1 | chr12:4647949-4669332     | 6,733  | 1,934  | 1,80 | CRC > NCT | 0,00145  | 0,0259223 |
| XLOC_001<br>936 | SSX2IP   | chr1:85108851-85156240    | 5,371  | 1,545  | 1,80 | CRC > NCT | 5,00E-05 | 0,0020443 |
| XLOC_032<br>454 | ZNF367   | chr9:99148224-99180669    | 3,166  | 0,912  | 1,80 | CRC > NCT | 0,0033   | 0,045347  |
| XLOC_005<br>135 | PLEKHB1  | chr11:73357222-73373996   | 14,952 | 4,317  | 1,79 | CRC > NCT | 0,0003   | 0,0084946 |
| XLOC_005<br>627 | KIF18A   | chr11:28042162-28129746   | 3,140  | 0,908  | 1,79 | CRC > NCT | 0,0031   | 0,0433833 |
| XLOC_012<br>543 | PFAS     | chr17:8152591-8173939     | 3,757  | 1,089  | 1,79 | CRC > NCT | 0,00065  | 0,0147056 |
| XLOC_033<br>425 | PLS3     | chrX:114752496-114885179  | 37,962 | 11,022 | 1,78 | CRC > NCT | 0,00025  | 0,0074979 |
| XLOC_004<br>283 | PDZD8    | chr10:119000583-119134978 | 10,596 | 3,078  | 1,78 | CRC > NCT | 0,0003   | 0,0084946 |
| XLOC_008<br>439 | SLC7A1   | chr13:30083387-30169825   | 12,831 | 3,730  | 1,78 | CRC > NCT | 5,00E-05 | 0,0020443 |
| XLOC_002<br>593 | DUSP10   | chr1:221874761-221915518  | 7,879  | 2,298  | 1,78 | CRC > NCT | 0,00155  | 0,0273878 |
| XLOC_023<br>848 | CFAP97   | chr4:186079839-186125182  | 8,588  | 2,515  | 1,77 | CRC > NCT | 0,00015  | 0,0050841 |
| XLOC_032<br>239 | NOL6     | chr9:33461284-33473941    | 11,024 | 3,231  | 1,77 | CRC > NCT | 5,00E-05 | 0,0020443 |
| XLOC_008<br>215 | CKAP2    | chr13:53028914-53050938   | 11,168 | 3,290  | 1,76 | CRC > NCT | 0,0002   | 0,006387  |
| XLOC_022<br>285 | RPL22L1  | chr3:170582664-170588445  | 71,427 | 21,197 | 1,75 | CRC > NCT | 5,00E-05 | 0,0020443 |
| XLOC_033<br>287 | KIF4A    | chrX:69509878-69640774    | 7,588  | 2,253  | 1,75 | CRC > NCT | 0,0006   | 0,0139198 |
| XLOC_007<br>469 | TIMELESS | chr12:56807385-56843215   | 7,716  | 2,293  | 1,75 | CRC > NCT | 5,00E-05 | 0,0020443 |
| XLOC_006<br>755 | SHMT2    | chr12:57623284-57634500   | 76,399 | 22,756 | 1,75 | CRC > NCT | 5,00E-05 | 0,0020443 |
| XLOC_011<br>006 | PRC1     | chr15:91509266-91537881   | 20,049 | 5,976  | 1,75 | CRC > NCT | 5,00E-05 | 0,0020443 |
| XLOC_022<br>960 | PAICS    | chr4:57301914-57327534    | 49,488 | 14,805 | 1,74 | CRC > NCT | 5,00E-05 | 0,0020443 |
| XLOC_022<br>759 | FGFRL1   | chr4:1000611-1020687      | 12,378 | 3,705  | 1,74 | CRC > NCT | 0,0037   | 0,0490331 |
| XLOC_019<br>809 | CHAF1B   | chr21:37757671-37791313   | 5,358  | 1,605  | 1,74 | CRC > NCT | 0,0021   | 0,0336498 |
| XLOC_021<br>371 | MCM2     | chr3:127317199-127341278  | 15,995 | 4,799  | 1,74 | CRC > NCT | 5,00E-05 | 0,0020443 |
| XLOC_031<br>711 | MELK     | chr9:36572858-36677683    | 12,228 | 3,681  | 1,73 | CRC > NCT | 0,00065  | 0,0147056 |

|                 |         |                           |        |        |      |           |          |           |
|-----------------|---------|---------------------------|--------|--------|------|-----------|----------|-----------|
| XLOC_020<br>631 | LIF     | chr22:30636434-30654020   | 9,164  | 2,759  | 1,73 | CRC > NCT | 0,00035  | 0,0094833 |
| XLOC_020<br>225 | ZNF74   | chr22:20748404-20763792   | 2,896  | 0,874  | 1,73 | CRC > NCT | 0,0037   | 0,0490331 |
| XLOC_030<br>573 | RRS1    | chr8:67331821-67344164    | 21,909 | 6,622  | 1,73 | CRC > NCT | 5,00E-05 | 0,0020443 |
| XLOC_021<br>725 | NUP210  | chr3:13357727-13461819    | 13,039 | 3,945  | 1,72 | CRC > NCT | 0,00075  | 0,0164378 |
| XLOC_030<br>961 | PBK     | chr8:27667127-27695612    | 15,502 | 4,699  | 1,72 | CRC > NCT | 0,0006   | 0,0139198 |
| XLOC_000<br>657 | GPSM2   | chr1:109419268-109506121  | 16,508 | 5,030  | 1,71 | CRC > NCT | 0,00195  | 0,0320923 |
| XLOC_011<br>878 | TFAP4   | chr16:4307186-4323001     | 8,139  | 2,486  | 1,71 | CRC > NCT | 0,00165  | 0,0284652 |
| XLOC_004<br>910 | FAM111B | chr11:58638531-58897176   | 6,020  | 1,849  | 1,70 | CRC > NCT | 0,0012   | 0,0226522 |
| XLOC_031<br>224 | NUDCD1  | chr8:110222708-110346350  | 14,117 | 4,337  | 1,70 | CRC > NCT | 0,0003   | 0,0084946 |
| XLOC_032<br>693 | QSOX2   | chr9:139098176-139137687  | 4,963  | 1,527  | 1,70 | CRC > NCT | 0,00095  | 0,0192909 |
| XLOC_026<br>332 | ADGRG6  | chr6:142623001-142767403  | 6,135  | 1,889  | 1,70 | CRC > NCT | 0,0004   | 0,01042   |
| XLOC_017<br>682 | PNPT1   | chr2:55860888-55921125    | 12,693 | 3,927  | 1,69 | CRC > NCT | 0,0001   | 0,003647  |
| XLOC_009<br>630 | WDHD1   | chr14:55405617-55493819   | 2,590  | 0,802  | 1,69 | CRC > NCT | 0,00205  | 0,0331105 |
| XLOC_009<br>861 | JAG2    | chr14:105607317-105635161 | 3,781  | 1,173  | 1,69 | CRC > NCT | 0,00055  | 0,0131101 |
| XLOC_031<br>653 | MTAP    | chr9:21802518-21914861    | 7,313  | 2,275  | 1,68 | CRC > NCT | 5,00E-05 | 0,0020443 |
| XLOC_016<br>623 | WDR43   | chr2:29117508-29171392    | 18,782 | 5,845  | 1,68 | CRC > NCT | 5,00E-05 | 0,0020443 |
| XLOC_019<br>099 | UBE2C   | chr20:44441214-44445596   | 69,163 | 21,587 | 1,68 | CRC > NCT | 0,00035  | 0,0094833 |
| XLOC_019<br>302 | -       | chr20:6194322-6196306     | 7,394  | 2,309  | 1,68 | CRC > NCT | 0,00315  | 0,0437473 |
| XLOC_029<br>601 | FIGNL1  | chr7:50503096-50518088    | 4,199  | 1,315  | 1,68 | CRC > NCT | 0,0024   | 0,0366226 |
| XLOC_007<br>388 | SLC11A2 | chr12:51373267-51422058   | 21,260 | 6,660  | 1,67 | CRC > NCT | 5,00E-05 | 0,0020443 |
| XLOC_026<br>271 | TPD52L1 | chr6:125474874-125584805  | 26,849 | 8,415  | 1,67 | CRC > NCT | 0,0004   | 0,01042   |
| XLOC_015<br>084 | GRAMD1A | chr19:35487146-35517389   | 21,263 | 6,716  | 1,66 | CRC > NCT | 0,00015  | 0,0050841 |
| XLOC_010<br>524 | AEN     | chr15:89152028-89175555   | 13,984 | 4,422  | 1,66 | CRC > NCT | 0,00015  | 0,0050841 |
| XLOC_012<br>767 | CDC6    | chr17:38443972-38460910   | 10,357 | 3,276  | 1,66 | CRC > NCT | 0,00035  | 0,0094833 |
| XLOC_022<br>801 | WFS1    | chr4:6271573-6305083      | 16,041 | 5,079  | 1,66 | CRC > NCT | 5,00E-05 | 0,0020443 |
| XLOC_003<br>449 | DDX21   | chr10:70707746-70745316   | 35,645 | 11,322 | 1,65 | CRC > NCT | 0,0001   | 0,003647  |
| XLOC_014<br>740 | ARID3A  | chr19:925764-975926       | 5,111  | 1,628  | 1,65 | CRC > NCT | 0,00115  | 0,0220507 |
| XLOC_026<br>059 | SLC29A1 | chr6:44187032-44208572    | 31,539 | 10,100 | 1,64 | CRC > NCT | 0,0014   | 0,0253013 |
| XLOC_021<br>589 | EPHB3   | chr3:184279456-184300198  | 18,214 | 5,872  | 1,63 | CRC > NCT | 5,00E-05 | 0,0020443 |
| XLOC_006<br>509 | -       | chr12:10658058-10660060   | 34,008 | 10,999 | 1,63 | CRC > NCT | 0,00025  | 0,0074979 |
| XLOC_032<br>558 | PHF19   | chr9:123617850-123657174  | 23,021 | 7,450  | 1,63 | CRC > NCT | 0,00215  | 0,0341212 |
| XLOC_021<br>850 | CDC25A  | chr3:48198666-48229892    | 4,894  | 1,585  | 1,63 | CRC > NCT | 0,0022   | 0,0346434 |
| XLOC_011<br>614 | PLEKHG4 | chr16:67282854-67360661   | 4,525  | 1,472  | 1,62 | CRC > NCT | 0,00295  | 0,0419277 |
| XLOC_003<br>580 | KIF11   | chr10:94352824-94415154   | 7,302  | 2,394  | 1,61 | CRC > NCT | 0,0005   | 0,0123209 |
| XLOC_013<br>941 | PYCR1   | chr17:79890258-79895204   | 64,260 | 21,082 | 1,61 | CRC > NCT | 5,00E-05 | 0,0020443 |
| XLOC_000<br>733 | WDR3    | chr1:118472371-118727848  | 11,949 | 3,929  | 1,60 | CRC > NCT | 0,00015  | 0,0050841 |
| XLOC_001<br>554 | ALDH4A1 | chr1:19197923-19229293    | 9,463  | 3,119  | 1,60 | CRC > NCT | 0,00305  | 0,0429805 |
| XLOC_020<br>214 | CDC45   | chr22:19467034-19509171   | 8,818  | 2,911  | 1,60 | CRC > NCT | 0,0027   | 0,0395776 |

|                 |               |                           |        |        |      |           |          |           |
|-----------------|---------------|---------------------------|--------|--------|------|-----------|----------|-----------|
| XLOC_031<br>904 | SMC2          | chr9:106856540-106907931  | 8,008  | 2,648  | 1,60 | CRC > NCT | 0,00015  | 0,0050841 |
| XLOC_019<br>236 | PCMTD2        | chr20:62887047-62907671   | 13,524 | 4,479  | 1,59 | CRC > NCT | 0,00045  | 0,0114127 |
| XLOC_024<br>332 | CCNB1         | chr5:68462836-68474571    | 37,264 | 12,348 | 1,59 | CRC > NCT | 0,0004   | 0,01042   |
| XLOC_022<br>645 | -             | chr3:155705121-155706910  | 54,531 | 18,075 | 1,59 | CRC > NCT | 5,00E-05 | 0,0020443 |
| XLOC_004<br>940 | CCDC86        | chr11:60609428-60623444   | 16,458 | 5,464  | 1,59 | CRC > NCT | 0,0006   | 0,0139198 |
| XLOC_024<br>894 | NUP155        | chr5:37286424-37371468    | 5,529  | 1,839  | 1,59 | CRC > NCT | 0,00025  | 0,0074979 |
| XLOC_010<br>328 | TCF12         | chr15:57178367-57585000   | 16,299 | 5,423  | 1,59 | CRC > NCT | 0,0027   | 0,0395776 |
| XLOC_022<br>866 | NCAPG         | chr4:17812435-18023529    | 7,037  | 2,342  | 1,59 | CRC > NCT | 0,0036   | 0,0481629 |
| XLOC_004<br>794 | CD44          | chr11:35154196-35253951   | 59,844 | 19,953 | 1,58 | CRC > NCT | 5,00E-05 | 0,0020443 |
| XLOC_021<br>369 | PLXNA1        | chr3:126701142-126756235  | 5,826  | 1,944  | 1,58 | CRC > NCT | 5,00E-05 | 0,0020443 |
| XLOC_032<br>480 | TEX10         | chr9:102861501-103151206  | 9,506  | 3,176  | 1,58 | CRC > NCT | 0,00255  | 0,0382395 |
| XLOC_016<br>076 | KCNN4         | chr19:44270633-44287236   | 35,776 | 11,963 | 1,58 | CRC > NCT | 0,0003   | 0,0084946 |
| XLOC_023<br>172 | PLK4          | chr4:128802015-128820377  | 4,053  | 1,357  | 1,58 | CRC > NCT | 0,00295  | 0,0419277 |
| XLOC_017<br>809 | POLR1A        | chr2:86247099-86333278    | 6,045  | 2,025  | 1,58 | CRC > NCT | 5,00E-05 | 0,0020443 |
| XLOC_008<br>398 | XPO4          | chr13:21351038-21476986   | 3,885  | 1,308  | 1,57 | CRC > NCT | 0,0002   | 0,006387  |
| XLOC_001<br>813 | STIL          | chr1:47715641-47780566    | 3,723  | 1,260  | 1,56 | CRC > NCT | 0,0026   | 0,0386713 |
| XLOC_004<br>963 | INCENP        | chr11:61891444-61923085   | 4,586  | 1,558  | 1,56 | CRC > NCT | 0,00065  | 0,0147056 |
| XLOC_031<br>029 | PRKDC         | chr8:48685340-48872743    | 19,958 | 6,791  | 1,56 | CRC > NCT | 5,00E-05 | 0,0020443 |
| XLOC_024<br>255 | SKP2          | chr5:36152144-36184145    | 8,651  | 2,955  | 1,55 | CRC > NCT | 0,0009   | 0,0185023 |
| XLOC_009<br>130 | FUT8          | chr14:65754784-66221534   | 15,279 | 5,250  | 1,54 | CRC > NCT | 5,00E-05 | 0,0020443 |
| XLOC_013<br>594 | BRCA1         | chr17:41196311-41277500   | 4,067  | 1,398  | 1,54 | CRC > NCT | 0,0023   | 0,035694  |
| XLOC_008<br>526 | RCBTB1        | chr13:50106078-50159726   | 6,157  | 2,118  | 1,54 | CRC > NCT | 0,0027   | 0,0395776 |
| XLOC_033<br>462 | UTP14A        | chrX:129040091-129067784  | 17,951 | 6,185  | 1,54 | CRC > NCT | 0,0003   | 0,0084946 |
| XLOC_000<br>209 | EPHB2         | chr1:23037272-23247994    | 14,510 | 5,001  | 1,54 | CRC > NCT | 0,0032   | 0,0443068 |
| XLOC_008<br>187 | LRCH1         | chr13:47127276-47327239   | 11,083 | 3,821  | 1,54 | CRC > NCT | 0,00035  | 0,0094833 |
| XLOC_004<br>986 | C11orf84      | chr11:63580845-63595460   | 8,912  | 3,073  | 1,54 | CRC > NCT | 0,00265  | 0,0390961 |
| XLOC_007<br>383 | RACGAP1       | chr12:50382944-50425514   | 19,529 | 6,757  | 1,53 | CRC > NCT | 5,00E-05 | 0,0020443 |
| XLOC_032<br>183 | HAUS6         | chr9:19053134-19103085    | 3,869  | 1,341  | 1,53 | CRC > NCT | 0,0012   | 0,0226522 |
| XLOC_003<br>649 | NOLC1         | chr10:103911932-103923630 | 39,011 | 13,539 | 1,53 | CRC > NCT | 5,00E-05 | 0,0020443 |
| XLOC_023<br>987 | -             | chr4:88812967-88814395    | 58,982 | 20,527 | 1,52 | CRC > NCT | 0,0004   | 0,01042   |
| XLOC_019<br>071 | MYBL2         | chr20:42295658-42345136   | 22,405 | 7,815  | 1,52 | CRC > NCT | 0,0009   | 0,0185023 |
| XLOC_015<br>728 | DNMT1         | chr19:10243898-10311599   | 12,456 | 4,348  | 1,52 | CRC > NCT | 0,0001   | 0,003647  |
| XLOC_020<br>648 | PATZ1         | chr22:31721789-31742561   | 9,164  | 3,215  | 1,51 | CRC > NCT | 0,0011   | 0,0213843 |
| XLOC_005<br>363 | CHEK1         | chr11:125494717-125550793 | 8,100  | 2,847  | 1,51 | CRC > NCT | 0,0009   | 0,0185023 |
| XLOC_002<br>807 | -             | chr1:27533338-27534161    | 40,514 | 14,290 | 1,50 | CRC > NCT | 0,0005   | 0,0123209 |
| XLOC_029<br>187 | MET           | chr7:116312407-116438445  | 22,040 | 7,811  | 1,50 | CRC > NCT | 5,00E-05 | 0,0020443 |
| XLOC_000<br>410 | KIF2C         | chr1:45205480-45233442    | 11,791 | 4,183  | 1,49 | CRC > NCT | 0,0016   | 0,0279196 |
| XLOC_011<br>287 | KREMEN2,PAQR4 | chr16:3013878-3030540     | 15,369 | 5,453  | 1,49 | CRC > NCT | 0,0025   | 0,037738  |

|                 |          |                           |         |         |      |           |          |           |
|-----------------|----------|---------------------------|---------|---------|------|-----------|----------|-----------|
| XLOC_026<br>824 | MCM3     | chr6:52128810-52150691    | 43,455  | 15,423  | 1,49 | CRC > NCT | 5,00E-05 | 0,0020443 |
| XLOC_024<br>639 | TCOF1    | chr5:149737201-149780386  | 10,644  | 3,793   | 1,49 | CRC > NCT | 0,0001   | 0,003647  |
| XLOC_013<br>011 | KPNA2    | chr17:66031685-66043702   | 64,327  | 22,973  | 1,49 | CRC > NCT | 5,00E-05 | 0,0020443 |
| XLOC_033<br>958 | NKRF     | chrX:118722108-118739846  | 5,808   | 2,087   | 1,48 | CRC > NCT | 0,0023   | 0,035694  |
| XLOC_033<br>174 | TIMP1    | chrX:47419263-47479256    | 402,750 | 145,138 | 1,47 | CRC > NCT | 0,00275  | 0,0400849 |
| XLOC_019<br>860 | RRP1B    | chr21:45079431-45116036   | 8,346   | 3,008   | 1,47 | CRC > NCT | 0,0002   | 0,006387  |
| XLOC_030<br>507 | AP3M2    | chr8:42010463-42028904    | 5,966   | 2,151   | 1,47 | CRC > NCT | 0,00215  | 0,0341212 |
| XLOC_017<br>329 | TTLL4    | chr2:219575567-219620269  | 5,718   | 2,064   | 1,47 | CRC > NCT | 0,00055  | 0,0131101 |
| XLOC_013<br>876 | RHBDF2   | chr17:74466867-74497509   | 6,966   | 2,517   | 1,47 | CRC > NCT | 0,00185  | 0,0307518 |
| XLOC_013<br>904 | CBX4     | chr17:77806954-77813213   | 12,694  | 4,596   | 1,47 | CRC > NCT | 0,00075  | 0,0164378 |
| XLOC_033<br>086 | SCML1    | chrX:17755568-17773108    | 8,689   | 3,172   | 1,45 | CRC > NCT | 0,00335  | 0,0457925 |
| XLOC_026<br>429 | SMOC2    | chr6:168841830-169068696  | 19,444  | 7,101   | 1,45 | CRC > NCT | 0,0014   | 0,0253013 |
| XLOC_007<br>395 | GALNT6   | chr12:51745050-51909549   | 10,440  | 3,816   | 1,45 | CRC > NCT | 0,0004   | 0,01042   |
| XLOC_019<br>117 | CSE1L    | chr20:47662782-47713497   | 46,618  | 17,049  | 1,45 | CRC > NCT | 5,00E-05 | 0,0020443 |
| XLOC_012<br>394 | -        | chr16:69790277-69791898   | 13,153  | 4,813   | 1,45 | CRC > NCT | 0,00295  | 0,0419277 |
| XLOC_006<br>912 | UTP20    | chr12:101673902-101783305 | 3,662   | 1,347   | 1,44 | CRC > NCT | 0,00255  | 0,0382395 |
| XLOC_017<br>860 | SEMA4C   | chr2:97525470-97539319    | 8,721   | 3,214   | 1,44 | CRC > NCT | 0,00355  | 0,0477391 |
| XLOC_004<br>817 | CD82     | chr11:44585982-44643437   | 31,654  | 11,674  | 1,44 | CRC > NCT | 0,0007   | 0,0155855 |
| XLOC_029<br>715 | CDK6     | chr7:92234234-92546501    | 4,918   | 1,821   | 1,43 | CRC > NCT | 0,00015  | 0,0050841 |
| XLOC_015<br>092 | FXYD5    | chr19:35645624-35660788   | 124,024 | 45,942  | 1,43 | CRC > NCT | 0,0001   | 0,003647  |
| XLOC_017<br>927 | ANAPC1   | chr2:112524749-112641987  | 4,065   | 1,513   | 1,43 | CRC > NCT | 0,0008   | 0,0171221 |
| XLOC_004<br>015 | ZWINT    | chr10:58117008-58121034   | 33,955  | 12,705  | 1,42 | CRC > NCT | 0,0004   | 0,01042   |
| XLOC_019<br>480 | TOMM34   | chr20:43570770-43589114   | 34,119  | 12,799  | 1,41 | CRC > NCT | 0,00025  | 0,0074979 |
| XLOC_022<br>132 | RUVBL1   | chr3:127799798-128127489  | 33,980  | 12,759  | 1,41 | CRC > NCT | 0,00165  | 0,0284652 |
| XLOC_007<br>696 | NAA25    | chr12:112464490-112547129 | 7,465   | 2,811   | 1,41 | CRC > NCT | 0,0012   | 0,0226522 |
| XLOC_001<br>207 | DIEXF    | chr1:210001108-210031064  | 3,718   | 1,401   | 1,41 | CRC > NCT | 0,001    | 0,0199726 |
| XLOC_004<br>581 | ATHL1    | chr11:289075-296258       | 10,710  | 4,052   | 1,40 | CRC > NCT | 0,002    | 0,03265   |
| XLOC_031<br>426 | -        | chr8:30209156-30210091    | 34,435  | 13,034  | 1,40 | CRC > NCT | 0,00265  | 0,0390961 |
| XLOC_029<br>879 | RBM28    | chr7:127924036-127983962  | 9,176   | 3,479   | 1,40 | CRC > NCT | 0,00255  | 0,0382395 |
| XLOC_016<br>226 | C19orf48 | chr19:51299837-51308230   | 60,826  | 23,228  | 1,39 | CRC > NCT | 0,0003   | 0,0084946 |
| XLOC_002<br>492 | UBE2T    | chr1:202298051-202311104  | 35,308  | 13,528  | 1,38 | CRC > NCT | 0,0024   | 0,0366226 |
| XLOC_017<br>506 | ODC1     | chr2:10580496-10588680    | 129,165 | 49,541  | 1,38 | CRC > NCT | 0,0002   | 0,006387  |
| XLOC_008<br>302 | IPO5     | chr13:98605928-98676645   | 32,994  | 12,661  | 1,38 | CRC > NCT | 5,00E-05 | 0,0020443 |
| XLOC_000<br>343 | CDCA8    | chr1:38158072-38175416    | 11,987  | 4,602   | 1,38 | CRC > NCT | 0,00185  | 0,0307518 |
| XLOC_005<br>731 | SLC43A1  | chr11:57251574-57283279   | 9,496   | 3,652   | 1,38 | CRC > NCT | 0,003    | 0,0424399 |
| XLOC_016<br>653 | QPCT     | chr2:37571752-37600466    | 18,359  | 7,088   | 1,37 | CRC > NCT | 0,00365  | 0,0486178 |
| XLOC_033<br>393 | PRPS1    | chrX:106871609-106894262  | 18,964  | 7,321   | 1,37 | CRC > NCT | 0,0012   | 0,0226522 |
| XLOC_012<br>025 | SEZ6L2   | chr16:29882479-29911036   | 11,663  | 4,512   | 1,37 | CRC > NCT | 0,00205  | 0,0331105 |



|                         |               |                             |               |              |             |                     |               |                  |
|-------------------------|---------------|-----------------------------|---------------|--------------|-------------|---------------------|---------------|------------------|
| XLOC_021<br>848         | SMARCC1       | chr3:47626771-47823405      | 22,532        | 8,733        | 1,37        | CRC > NCT           | 5,00E-05      | 0,0020443        |
| XLOC_024<br>452         | WDR36         | chr5:110427869-110466426    | 5,711         | 2,214        | 1,37        | CRC > NCT           | 0,00065       | 0,0147056        |
| XLOC_004<br>169         | RRP12         | chr10:99116331-99185823     | 9,606         | 3,737        | 1,36        | CRC > NCT           | 0,0026        | 0,0386713        |
| XLOC_002<br>152         | ANP32E        | chr1:150190716-150208504    | 16,068        | 6,305        | 1,35        | CRC > NCT           | 0,0005        | 0,0123209        |
| XLOC_021<br>372         | PODXL2        | chr3:127348001-127391653    | 19,994        | 7,849        | 1,35        | CRC > NCT           | 0,00115       | 0,0220507        |
| XLOC_033<br>943         | -             | chrX:110862792-110864747    | 19,037        | 7,489        | 1,35        | CRC > NCT           | 0,00175       | 0,0294656        |
| XLOC_017<br>193         | DNAJC10       | chr2:183580764-183650012    | 27,839        | 10,954       | 1,35        | CRC > NCT           | 0,00015       | 0,0050841        |
| XLOC_029<br>881         | IMPDH1        | chr7:128032330-128050041    | 25,937        | 10,223       | 1,34        | CRC > NCT           | 0,001         | 0,0199726        |
| XLOC_031<br>225         | SYBU          | chr8:110586240-110704020    | 12,400        | 4,891        | 1,34        | CRC > NCT           | 0,0012        | 0,0226522        |
| XLOC_013<br>867         | EVPL          | chr17:74002649-74023519     | 7,225         | 2,852        | 1,34        | CRC > NCT           | 0,0008        | 0,0171221        |
| XLOC_018<br>014         | MCM6          | chr2:136597195-136634047    | 18,242        | 7,217        | 1,34        | CRC > NCT           | 0,00035       | 0,0094833        |
| XLOC_013<br>097         | BIRC5         | chr17:76210276-76221716     | 16,447        | 6,517        | 1,34        | CRC > NCT           | 0,0019        | 0,0313827        |
| XLOC_003<br>667         | PDCD11        | chr10:105156330-105212392   | 8,136         | 3,225        | 1,33        | CRC > NCT           | 0,00115       | 0,0220507        |
| XLOC_017<br>400         | INPP5D        | chr2:233924532-234116550    | 11,993        | 4,766        | 1,33        | CRC > NCT           | 0,0009        | 0,0185023        |
| XLOC_028<br>747         | TTYH3         | chr7:2671602-2704438        | 31,848        | 12,689       | 1,33        | CRC > NCT           | 0,0002        | 0,006387         |
| XLOC_008<br>473         | PROSER1       | chr13:39584001-39612290     | 14,991        | 5,990        | 1,32        | CRC > NCT           | 0,00135       | 0,0246666        |
| XLOC_011<br>370         | ABCC1         | chr16:16043433-16237134     | 8,309         | 3,329        | 1,32        | CRC > NCT           | 0,00035       | 0,0094833        |
| XLOC_030<br>731         | SQLE          | chr8:126010719-126034527    | 21,522        | 8,628        | 1,32        | CRC > NCT           | 0,0024        | 0,0366226        |
| XLOC_013<br>268         | TP53          | chr17:7571719-7606820       | 30,839        | 12,374       | 1,32        | CRC > NCT           | 0,00085       | 0,0178569        |
| <b>XLOC_024<br/>815</b> | <b>LPCAT1</b> | <b>chr5:1461538-1524076</b> | <b>21,642</b> | <b>8,690</b> | <b>1,32</b> | <b>CRC &gt; NCT</b> | <b>0,0008</b> | <b>0,0171221</b> |
| XLOC_030<br>025         | LMBR1         | chr7:156433352-156685910    | 9,847         | 3,956        | 1,32        | CRC > NCT           | 0,00135       | 0,0246666        |
| XLOC_007<br>016         | MLEC          | chr12:121124632-121142494   | 78,955        | 31,738       | 1,31        | CRC > NCT           | 0,00185       | 0,0307518        |
| XLOC_018<br>276         | CHPF          | chr2:220403668-220415317    | 43,471        | 17,563       | 1,31        | CRC > NCT           | 0,00075       | 0,0164378        |
| XLOC_022<br>211         | HLTF          | chr3:148746179-148820610    | 5,587         | 2,260        | 1,31        | CRC > NCT           | 0,00335       | 0,0457925        |
| XLOC_001<br>493         | SRM           | chr1:11114648-11120091      | 50,639        | 20,551       | 1,30        | CRC > NCT           | 0,0006        | 0,0139198        |
| XLOC_007<br>556         | NAP1L1        | chr12:76438573-76478813     | 112,926       | 46,033       | 1,29        | CRC > NCT           | 0,0018        | 0,0301682        |
| XLOC_017<br>257         | NOP58         | chr2:203130313-203168659    | 53,813        | 21,978       | 1,29        | CRC > NCT           | 0,00015       | 0,0050841        |
| XLOC_016<br>782         | SMYD5         | chr2:73441365-73454362      | 9,942         | 4,064        | 1,29        | CRC > NCT           | 0,00285       | 0,0411153        |
| XLOC_007<br>112         | PGAM5         | chr12:133287392-133299323   | 21,652        | 8,850        | 1,29        | CRC > NCT           | 0,0006        | 0,0139198        |
| XLOC_027<br>080         | LRP11         | chr6:150139893-150390574    | 13,233        | 5,423        | 1,29        | CRC > NCT           | 0,0011        | 0,0213843        |
| XLOC_006<br>056         | DCUN1D5       | chr11:102921292-102962944   | 2,650         | 1,087        | 1,29        | CRC > NCT           | 0,00125       | 0,0233782        |
| XLOC_004<br>959         | MYRF          | chr11:61518162-61555992     | 8,545         | 3,508        | 1,28        | CRC > NCT           | 0,0019        | 0,0313827        |
| XLOC_024<br>249         | BRX1          | chr5:34905365-34926953      | 41,973        | 17,234       | 1,28        | CRC > NCT           | 0,0037        | 0,0490331        |
| XLOC_023<br>113         | NPNT          | chr4:106816074-106892831    | 15,071        | 6,190        | 1,28        | CRC > NCT           | 0,0006        | 0,0139198        |
| XLOC_005<br>950         | KCNE3         | chr11:74165809-74178641     | 22,645        | 9,326        | 1,28        | CRC > NCT           | 0,00105       | 0,0206545        |
| XLOC_021<br>493         | GMPS          | chr3:155588252-155661927    | 18,523        | 7,643        | 1,28        | CRC > NCT           | 0,00125       | 0,0233782        |
| XLOC_023<br>087         | SMARCAD1      | chr4:95128758-95213777      | 7,841         | 3,244        | 1,27        | CRC > NCT           | 0,0023        | 0,035694         |
| XLOC_011<br>638         | CIRH1A        | chr16:69166498-69202937     | 20,523        | 8,493        | 1,27        | CRC > NCT           | 0,00115       | 0,0220507        |

|                 |              |                           |         |        |      |           |         |           |
|-----------------|--------------|---------------------------|---------|--------|------|-----------|---------|-----------|
| XLOC_030<br>493 | ADAM9        | chr8:38854504-38963086    | 44,466  | 18,406 | 1,27 | CRC > NCT | 0,00055 | 0,0131101 |
| XLOC_033<br>474 | PHF6         | chrX:133507271-133562822  | 7,556   | 3,134  | 1,27 | CRC > NCT | 0,0019  | 0,0313827 |
| XLOC_004<br>214 | FGF8,NPM3    | chr10:103529886-103543170 | 41,146  | 17,077 | 1,27 | CRC > NCT | 0,0031  | 0,0433833 |
| XLOC_002<br>679 | TARBP1       | chr1:234527058-234614928  | 10,349  | 4,296  | 1,27 | CRC > NCT | 0,0025  | 0,037738  |
| XLOC_013<br>326 | CDRT1,TRIM16 | chr17:15468795-15587619   | 22,815  | 9,479  | 1,27 | CRC > NCT | 0,00115 | 0,0220507 |
| XLOC_008<br>099 | NUPL1        | chr13:25875665-25916672   | 11,321  | 4,707  | 1,27 | CRC > NCT | 0,00105 | 0,0206545 |
| XLOC_033<br>997 | ZDHHC9       | chrX:128934725-128977910  | 21,699  | 9,039  | 1,26 | CRC > NCT | 0,0003  | 0,0084946 |
| XLOC_022<br>083 | LRRC58       | chr3:120043316-120068186  | 4,510   | 1,881  | 1,26 | CRC > NCT | 0,0019  | 0,0313827 |
| XLOC_021<br>908 | RRP9         | chr3:51967425-51976075    | 21,373  | 8,922  | 1,26 | CRC > NCT | 0,00205 | 0,0331105 |
| XLOC_001<br>541 | ESPNP        | chr1:17009631-17046652    | 9,865   | 4,128  | 1,26 | CRC > NCT | 0,002   | 0,03265   |
| XLOC_019<br>413 | AHCY         | chr20:32868070-32899608   | 135,364 | 56,640 | 1,26 | CRC > NCT | 0,00065 | 0,0147056 |
| XLOC_024<br>751 | FGFR4        | chr5:176513171-176525143  | 22,281  | 9,330  | 1,26 | CRC > NCT | 0,00135 | 0,0246666 |
| XLOC_028<br>859 | GARS         | chr7:30624712-30673653    | 77,377  | 32,472 | 1,25 | CRC > NCT | 0,00025 | 0,0074979 |
| XLOC_006<br>045 | TMEM123      | chr11:102267055-102332774 | 79,583  | 33,572 | 1,25 | CRC > NCT | 0,00015 | 0,0050841 |
| XLOC_018<br>206 | WDR12        | chr2:203737677-203852940  | 16,971  | 7,200  | 1,24 | CRC > NCT | 0,0036  | 0,0481629 |
| XLOC_026<br>936 | ASCC3        | chr6:100956070-101331114  | 9,994   | 4,240  | 1,24 | CRC > NCT | 0,0013  | 0,0239449 |
| XLOC_019<br>297 | GPCPD1       | chr20:5524984-5591677     | 15,871  | 6,737  | 1,24 | CRC > NCT | 0,00185 | 0,0307518 |
| XLOC_007<br>099 | PUS1         | chr12:132413744-132428410 | 20,875  | 8,870  | 1,23 | CRC > NCT | 0,0031  | 0,0433833 |
| XLOC_010<br>373 | HACD3        | chr15:65822794-65870701   | 34,426  | 14,639 | 1,23 | CRC > NCT | 0,0001  | 0,003647  |
| XLOC_033<br>701 | BCOR         | chrX:39909113-40036582    | 5,480   | 2,333  | 1,23 | CRC > NCT | 0,002   | 0,03265   |
| XLOC_031<br>829 | CKS2         | chr9:91924589-91932965    | 137,175 | 58,406 | 1,23 | CRC > NCT | 0,00135 | 0,0246666 |
| XLOC_006<br>145 | PVRL1        | chr11:119508807-119599435 | 13,216  | 5,640  | 1,23 | CRC > NCT | 0,00295 | 0,0419277 |
| XLOC_031<br>335 | TOP1MT       | chr8:144391464-144442147  | 18,955  | 8,112  | 1,22 | CRC > NCT | 0,00335 | 0,0457925 |
| XLOC_034<br>016 | GPC4         | chrX:132433850-132549677  | 14,094  | 6,040  | 1,22 | CRC > NCT | 0,00125 | 0,0233782 |
| XLOC_021<br>514 | SMC4         | chr3:159974773-160152788  | 16,872  | 7,318  | 1,21 | CRC > NCT | 0,0022  | 0,0346434 |
| XLOC_021<br>571 | YEATS2       | chr3:183415588-183530798  | 4,957   | 2,150  | 1,20 | CRC > NCT | 0,0033  | 0,045347  |
| XLOC_033<br>057 | PRPS2        | chrX:12809473-12843667    | 27,006  | 11,757 | 1,20 | CRC > NCT | 0,00075 | 0,0164378 |
| XLOC_006<br>803 | NUP107       | chr12:69080674-69139578   | 15,274  | 6,655  | 1,20 | CRC > NCT | 0,0017  | 0,0290257 |
| XLOC_001<br>551 | RCC2         | chr1:17733250-17766262    | 39,402  | 17,173 | 1,20 | CRC > NCT | 0,00015 | 0,0050841 |
| XLOC_024<br>965 | PLK2         | chr5:57749806-57755966    | 13,537  | 5,901  | 1,20 | CRC > NCT | 0,00275 | 0,0400849 |
| XLOC_007<br>496 | CDK4         | chr12:58137114-58146504   | 79,263  | 34,568 | 1,20 | CRC > NCT | 0,00325 | 0,0448628 |
| XLOC_020<br>906 | BHLHE40      | chr3:4938492-5027119      | 61,759  | 27,007 | 1,19 | CRC > NCT | 0,00295 | 0,0419277 |
| XLOC_032<br>147 | KIAA0020     | chr9:2769579-2844130      | 25,739  | 11,272 | 1,19 | CRC > NCT | 0,00145 | 0,0259223 |
| XLOC_018<br>015 | DARS         | chr2:136662634-136765134  | 28,102  | 12,331 | 1,19 | CRC > NCT | 0,0011  | 0,0213843 |
| XLOC_031<br>152 | NBN          | chr8:90945434-90996952    | 13,379  | 5,874  | 1,19 | CRC > NCT | 0,0016  | 0,0279196 |
| XLOC_002<br>623 | PARP1        | chr1:226548391-226595801  | 33,321  | 14,634 | 1,19 | CRC > NCT | 0,00035 | 0,0094833 |
| XLOC_030<br>691 | DCAF13       | chr8:104410865-104455680  | 27,535  | 12,094 | 1,19 | CRC > NCT | 0,0033  | 0,045347  |
| XLOC_004<br>704 | IPO7         | chr11:9405995-9469678     | 24,768  | 10,957 | 1,18 | CRC > NCT | 0,0005  | 0,0123209 |

|                 |              |                           |         |         |      |           |         |           |
|-----------------|--------------|---------------------------|---------|---------|------|-----------|---------|-----------|
| XLOC_033<br>858 | ATRX         | chrX:76759460-77041755    | 4,678   | 2,073   | 1,17 | CRC > NCT | 0,00365 | 0,0486178 |
| XLOC_006<br>731 | CDK2         | chr12:56360549-56366573   | 15,980  | 7,080   | 1,17 | CRC > NCT | 0,00255 | 0,0382395 |
| XLOC_011<br>579 | ADGRG1       | chr16:57653604-57699430   | 35,246  | 15,644  | 1,17 | CRC > NCT | 0,0008  | 0,0171221 |
| XLOC_025<br>972 | HMGA1        | chr6:34204576-34218326    | 189,633 | 84,495  | 1,17 | CRC > NCT | 0,0029  | 0,0416718 |
| XLOC_029<br>261 | NUP205       | chr7:135242517-135333501  | 18,521  | 8,314   | 1,16 | CRC > NCT | 0,00235 | 0,0361928 |
| XLOC_016<br>695 | MSH2         | chr2:47630205-47710455    | 11,732  | 5,268   | 1,16 | CRC > NCT | 0,0037  | 0,0490331 |
| XLOC_005<br>929 | DHCR7        | chr11:71145456-71159477   | 21,799  | 9,791   | 1,15 | CRC > NCT | 0,0021  | 0,0336498 |
| XLOC_018<br>940 | DTD1         | chr20:18568555-18744560   | 35,334  | 15,877  | 1,15 | CRC > NCT | 0,00355 | 0,0477391 |
| XLOC_023<br>038 | ANXA3        | chr4:79472741-79531605    | 74,792  | 33,640  | 1,15 | CRC > NCT | 0,0016  | 0,0279196 |
| XLOC_024<br>500 | LMNB1        | chr5:126112314-126172712  | 33,660  | 15,244  | 1,14 | CRC > NCT | 0,003   | 0,0424399 |
| XLOC_018<br>314 | NCL          | chr2:232319458-232329205  | 228,281 | 103,390 | 1,14 | CRC > NCT | 0,0011  | 0,0213843 |
| XLOC_013<br>568 | ACLY         | chr17:40023022-40075275   | 31,318  | 14,210  | 1,14 | CRC > NCT | 0,00345 | 0,046739  |
| XLOC_029<br>511 | HOXA10,HOXA9 | chr7:27201739-27219880    | 48,824  | 22,254  | 1,13 | CRC > NCT | 0,0029  | 0,0416718 |
| XLOC_020<br>287 | MIF,SLC2A11  | chr22:24198771-24268664   | 767,542 | 350,074 | 1,13 | CRC > NCT | 0,00175 | 0,0294656 |
| XLOC_029<br>544 | DPY19L1      | chr7:34966246-35225774    | 9,564   | 4,372   | 1,13 | CRC > NCT | 0,00365 | 0,0486178 |
| XLOC_001<br>741 | PABPC4       | chr1:40026482-40042581    | 50,121  | 23,016  | 1,12 | CRC > NCT | 0,00235 | 0,0361928 |
| XLOC_013<br>572 | KAT2A        | chr17:40265075-40273382   | 20,208  | 9,286   | 1,12 | CRC > NCT | 0,00315 | 0,0437473 |
| XLOC_002<br>182 | S100A11      | chr1:152004981-152009511  | 967,842 | 445,734 | 1,12 | CRC > NCT | 0,0032  | 0,0443068 |
| XLOC_014<br>197 | TGIF1        | chr18:3411924-3458633     | 45,573  | 21,172  | 1,11 | CRC > NCT | 0,0025  | 0,037738  |
| XLOC_011<br>653 | SF3B3        | chr16:70557532-70613116   | 14,793  | 6,882   | 1,10 | CRC > NCT | 0,00065 | 0,0147056 |
| XLOC_028<br>942 | CCT6A        | chr7:56119377-56131682    | 99,257  | 46,179  | 1,10 | CRC > NCT | 0,0009  | 0,0185023 |
| XLOC_005<br>232 | YAP1         | chr11:101980499-102104809 | 19,443  | 9,075   | 1,10 | CRC > NCT | 0,0024  | 0,0366226 |
| XLOC_007<br>090 | RAN          | chr12:131356520-131362472 | 102,924 | 48,150  | 1,10 | CRC > NCT | 0,00105 | 0,0206545 |
| XLOC_015<br>588 | TCF3         | chr19:1609285-1652428     | 20,216  | 9,468   | 1,09 | CRC > NCT | 0,00135 | 0,0246666 |
| XLOC_011<br>607 | CBFB         | chr16:67063012-67134993   | 16,685  | 7,855   | 1,09 | CRC > NCT | 0,0038  | 0,049887  |
| XLOC_021<br>520 | NMD3         | chr3:160938936-160971766  | 19,302  | 9,098   | 1,09 | CRC > NCT | 0,00375 | 0,0494799 |
| XLOC_017<br>208 | WDR75        | chr2:190306067-190348086  | 21,323  | 10,084  | 1,08 | CRC > NCT | 0,003   | 0,0424399 |
| XLOC_024<br>709 | NPM1         | chr5:170814657-170839109  | 260,622 | 124,478 | 1,07 | CRC > NCT | 0,0015  | 0,0267114 |
| XLOC_003<br>359 | BMS1         | chr10:43274921-43330385   | 8,973   | 4,304   | 1,06 | CRC > NCT | 0,0023  | 0,035694  |
| XLOC_000<br>015 | AGRN         | chr1:955502-991499        | 15,230  | 8,084   | 1,05 | CRC > NCT | 0,00215 | 0,0341212 |
| XLOC_026<br>033 | RPL7L1       | chr6:42847360-42858825    | 23,813  | 11,478  | 1,05 | CRC > NCT | 0,00165 | 0,0284652 |
| XLOC_029<br>213 | SND1         | chr7:127292201-127732659  | 68,442  | 33,047  | 1,05 | CRC > NCT | 0,0012  | 0,0226522 |
| XLOC_032<br>256 | SIGMAR1      | chr9:34634677-34637823    | 53,869  | 26,039  | 1,05 | CRC > NCT | 0,00265 | 0,0390961 |
| XLOC_007<br>731 | GCN1         | chr12:120564922-120632515 | 14,432  | 6,995   | 1,04 | CRC > NCT | 0,00115 | 0,0220507 |
| XLOC_001<br>627 | STMN1        | chr1:26210676-26233368    | 119,982 | 58,310  | 1,04 | CRC > NCT | 0,00255 | 0,0382395 |
| XLOC_007<br>162 | CHD4,NOP2    | chr12:6666033-6723326     | 48,342  | 23,509  | 1,04 | CRC > NCT | 0,0026  | 0,0386713 |
| XLOC_026<br>896 | SYNCRIP      | chr6:86316710-86353748    | 35,167  | 17,191  | 1,03 | CRC > NCT | 0,0027  | 0,0395776 |
| XLOC_033<br>104 | EIF2S3       | chrX:24072719-24097166    | 59,021  | 28,982  | 1,03 | CRC > NCT | 0,0035  | 0,0472409 |

|                 |          |                           |         |         |       |           |         |           |
|-----------------|----------|---------------------------|---------|---------|-------|-----------|---------|-----------|
| XLOC_006<br>899 | TMPO     | chr12:98906750-98944157   | 33,095  | 16,256  | 1,03  | CRC > NCT | 0,0028  | 0,0405866 |
| XLOC_006<br>811 | CCT2     | chr12:69979207-69995357   | 141,324 | 69,639  | 1,02  | CRC > NCT | 0,00205 | 0,0331105 |
| XLOC_011<br>922 | RSL1D1   | chr16:11928054-11945442   | 34,584  | 17,202  | 1,01  | CRC > NCT | 0,00165 | 0,0284652 |
| XLOC_003<br>925 | KIF5B    | chr10:32297176-32345467   | 46,478  | 23,137  | 1,01  | CRC > NCT | 0,00295 | 0,0419277 |
| XLOC_008<br>097 | PABPC3   | chr13:25670275-25672704   | 28,096  | 14,051  | 1,00  | CRC > NCT | 0,0038  | 0,049887  |
| XLOC_017<br>101 | PKP4     | chr2:159313391-159539466  | 17,438  | 8,777   | 0,99  | CRC > NCT | 0,00295 | 0,0419277 |
| XLOC_022<br>462 | -        | chr3:22423206-22424413    | 124,721 | 62,888  | 0,99  | CRC > NCT | 0,0025  | 0,037738  |
| XLOC_014<br>886 | ILF3     | chr19:10764936-10803098   | 42,813  | 21,705  | 0,98  | CRC > NCT | 0,00295 | 0,0419277 |
| XLOC_033<br>780 | HUWE1    | chrX:53559056-53713674    | 11,702  | 6,022   | 0,96  | CRC > NCT | 0,00225 | 0,0351876 |
| XLOC_008<br>998 | DCAF11   | chr14:24583275-24594763   | 19,632  | 37,793  | -0,94 | CRC < NCT | 0,0033  | 0,045347  |
| XLOC_006<br>560 | CMAS     | chr12:22199109-22218606   | 42,334  | 82,865  | -0,97 | CRC < NCT | 0,00325 | 0,0448628 |
| XLOC_033<br>439 | UBE2A    | chrX:118706917-118719461  | 45,729  | 89,589  | -0,97 | CRC < NCT | 0,00335 | 0,0457925 |
| XLOC_024<br>743 | HIGD2A   | chr5:175815783-175816751  | 161,064 | 316,375 | -0,97 | CRC < NCT | 0,0036  | 0,0481629 |
| XLOC_026<br>151 | SH3BGRL2 | chr6:80247367-80414079    | 24,573  | 48,370  | -0,98 | CRC < NCT | 0,00365 | 0,0486178 |
| XLOC_011<br>663 | IST1     | chr16:71927366-72033877   | 29,493  | 58,113  | -0,98 | CRC < NCT | 0,00225 | 0,0351876 |
| XLOC_029<br>931 | MKRN1    | chr7:140152567-140179445  | 51,766  | 102,018 | -0,98 | CRC < NCT | 0,00315 | 0,0437473 |
| XLOC_032<br>235 | B4GALT1  | chr9:33110638-33180526    | 29,236  | 57,731  | -0,98 | CRC < NCT | 0,00375 | 0,0494799 |
| XLOC_020<br>744 | NDUFA6   | chr22:42481529-42549086   | 75,250  | 148,782 | -0,98 | CRC < NCT | 0,0035  | 0,0472409 |
| XLOC_013<br>789 | GNA13    | chr17:62992552-63052920   | 10,702  | 21,244  | -0,99 | CRC < NCT | 0,0036  | 0,0481629 |
| XLOC_019<br>866 | C21orf33 | chr21:45553493-45565605   | 53,636  | 106,648 | -0,99 | CRC < NCT | 0,00375 | 0,0494799 |
| XLOC_021<br>567 | B3GNT5   | chr3:182895791-183146057  | 13,749  | 27,432  | -1,00 | CRC < NCT | 0,00345 | 0,046739  |
| XLOC_000<br>888 | SLC50A1  | chr1:155107819-155111599  | 47,551  | 95,581  | -1,01 | CRC < NCT | 0,00375 | 0,0494799 |
| XLOC_004<br>184 | GOT1     | chr10:101156626-101190530 | 27,403  | 55,105  | -1,01 | CRC < NCT | 0,00285 | 0,0411153 |
| XLOC_010<br>459 | IDH3A    | chr15:78441676-78527049   | 23,803  | 47,881  | -1,01 | CRC < NCT | 0,00205 | 0,0331105 |
| XLOC_001<br>548 | SDHB     | chr1:17345224-17380665    | 93,814  | 188,952 | -1,01 | CRC < NCT | 0,00185 | 0,0307518 |
| XLOC_021<br>889 | UBA7     | chr3:49842635-49855514    | 11,957  | 24,273  | -1,02 | CRC < NCT | 0,0029  | 0,0416718 |
| XLOC_000<br>268 | STX12    | chr1:28099693-28150963    | 16,799  | 34,104  | -1,02 | CRC < NCT | 0,0017  | 0,0290257 |
| XLOC_017<br>378 | CAB39    | chr2:231574872-231685791  | 30,935  | 62,947  | -1,02 | CRC < NCT | 0,0021  | 0,0336498 |
| XLOC_001<br>423 | AURKAIP1 | chr1:1309105-1312012      | 112,320 | 228,953 | -1,03 | CRC < NCT | 0,003   | 0,0424399 |
| XLOC_027<br>257 | -        | chr6:37012569-37013538    | 229,540 | 468,378 | -1,03 | CRC < NCT | 0,00295 | 0,0419277 |
| XLOC_013<br>278 | VAMP2    | chr17:8062462-8066305     | 18,237  | 37,268  | -1,03 | CRC < NCT | 0,00345 | 0,046739  |
| XLOC_010<br>669 | LPCAT4   | chr15:34651088-34659395   | 33,280  | 68,143  | -1,03 | CRC < NCT | 0,0025  | 0,037738  |
| XLOC_016<br>144 | NAPA     | chr19:47978397-48018515   | 54,633  | 112,286 | -1,04 | CRC < NCT | 0,0023  | 0,035694  |
| XLOC_005<br>414 | SIGIRR   | chr11:405708-417403       | 30,143  | 62,125  | -1,04 | CRC < NCT | 0,0031  | 0,0433833 |
| XLOC_007<br>765 | VPS37B   | chr12:123349079-123380766 | 32,077  | 66,147  | -1,04 | CRC < NCT | 0,0018  | 0,0301682 |
| XLOC_016<br>041 | RABAC1   | chr19:42460824-42463528   | 113,736 | 234,548 | -1,04 | CRC < NCT | 0,0026  | 0,0386713 |
| XLOC_000<br>258 | ZDHHC18  | chr1:27153200-27184072    | 9,466   | 19,547  | -1,05 | CRC < NCT | 0,0035  | 0,0472409 |
| XLOC_000<br>043 | RER1     | chr1:2252642-2345153      | 41,188  | 85,111  | -1,05 | CRC < NCT | 0,00245 | 0,0372298 |

|                 |             |                           |         |          |       |           |         |           |
|-----------------|-------------|---------------------------|---------|----------|-------|-----------|---------|-----------|
| XLOC_028<br>970 | ASL         | chr7:65540775-65558329    | 50,090  | 103,979  | -1,05 | CRC < NCT | 0,0027  | 0,0395776 |
| XLOC_016<br>656 | GALM        | chr2:38893051-38961909    | 19,679  | 40,999   | -1,06 | CRC < NCT | 0,0036  | 0,0481629 |
| XLOC_032<br>080 | RXRA        | chr9:137218308-137332831  | 10,275  | 21,417   | -1,06 | CRC < NCT | 0,0019  | 0,0313827 |
| XLOC_033<br>323 | COX7B       | chrX:77151252-77160881    | 619,180 | 1293,560 | -1,06 | CRC < NCT | 0,00265 | 0,0390961 |
| XLOC_024<br>171 | SDHA        | chr5:201130-257197        | 60,867  | 127,239  | -1,06 | CRC < NCT | 0,0025  | 0,037738  |
| XLOC_020<br>084 | PTTG1IP     | chr21:46269499-46293818   | 92,056  | 192,533  | -1,06 | CRC < NCT | 0,00165 | 0,0284652 |
| XLOC_021<br>865 | IP6K2       | chr3:48725431-48754901    | 43,360  | 90,689   | -1,06 | CRC < NCT | 0,00235 | 0,0361928 |
| XLOC_013<br>850 | HN1         | chr17:73131335-73150778   | 98,164  | 205,966  | -1,07 | CRC < NCT | 0,0022  | 0,0346434 |
| XLOC_010<br>919 | ETFA        | chr15:76352298-76604008   | 110,012 | 231,029  | -1,07 | CRC < NCT | 0,0012  | 0,0226522 |
| XLOC_000<br>395 | PTPRF       | chr1:43989771-44089538    | 30,551  | 64,232   | -1,07 | CRC < NCT | 0,00205 | 0,0331105 |
| XLOC_030<br>638 | DECR1       | chr8:91013529-91095109    | 86,855  | 183,301  | -1,08 | CRC < NCT | 0,0018  | 0,0301682 |
| XLOC_013<br>218 | ATP2A3      | chr17:3827159-3867929     | 25,224  | 53,325   | -1,08 | CRC < NCT | 0,0026  | 0,0386713 |
| XLOC_021<br>352 | KALRN       | chr3:123752448-124440344  | 11,544  | 24,412   | -1,08 | CRC < NCT | 0,00355 | 0,0477391 |
| XLOC_011<br>445 | SH2B1       | chr16:28857864-28885536   | 13,735  | 29,047   | -1,08 | CRC < NCT | 0,0031  | 0,0433833 |
| XLOC_012<br>801 | MLX         | chr17:40719077-40730458   | 31,820  | 67,296   | -1,08 | CRC < NCT | 0,0012  | 0,0226522 |
| XLOC_001<br>893 | SLC35D1     | chr1:67463957-67520298    | 7,854   | 16,629   | -1,08 | CRC < NCT | 0,00225 | 0,0351876 |
| XLOC_032<br>717 | FBXW5       | chr9:139834882-139841429  | 48,228  | 102,155  | -1,08 | CRC < NCT | 0,0022  | 0,0346434 |
| XLOC_008<br>395 | CRYL1       | chr13:20977803-21100039   | 53,526  | 113,738  | -1,09 | CRC < NCT | 0,0022  | 0,0346434 |
| XLOC_014<br>232 | IMPA2       | chr18:11981426-12033336   | 34,185  | 72,698   | -1,09 | CRC < NCT | 0,00155 | 0,0273878 |
| XLOC_001<br>583 | ECE1        | chr1:21543584-21672034    | 20,830  | 44,394   | -1,09 | CRC < NCT | 0,0014  | 0,0253013 |
| XLOC_013<br>940 | MAFG,SIRT7  | chr17:79869702-79885593   | 21,510  | 46,039   | -1,10 | CRC < NCT | 0,00295 | 0,0419277 |
| XLOC_026<br>872 | COX7A2      | chr6:75947390-75954098    | 397,934 | 853,594  | -1,10 | CRC < NCT | 0,00205 | 0,0331105 |
| XLOC_005<br>551 | TMEM9B      | chr11:8968747-9001111     | 41,671  | 89,431   | -1,10 | CRC < NCT | 0,00125 | 0,0233782 |
| XLOC_014<br>231 | CHMP1B      | chr18:11689013-11909195   | 26,614  | 57,154   | -1,10 | CRC < NCT | 0,00265 | 0,0390961 |
| XLOC_020<br>438 | SMDT1       | chr22:42475694-42480288   | 25,150  | 54,131   | -1,11 | CRC < NCT | 0,00205 | 0,0331105 |
| XLOC_003<br>681 | DUSP5       | chr10:112256521-112271337 | 17,402  | 37,500   | -1,11 | CRC < NCT | 0,00295 | 0,0419277 |
| XLOC_001<br>505 | DHRS3       | chr1:12627936-12679969    | 53,289  | 114,993  | -1,11 | CRC < NCT | 0,00155 | 0,0273878 |
| XLOC_020<br>671 | APOL2       | chr22:36622247-36636000   | 9,443   | 20,381   | -1,11 | CRC < NCT | 0,0035  | 0,0472409 |
| XLOC_024<br>637 | CDX1,SLC6A7 | chr5:149546070-149590790  | 100,799 | 218,347  | -1,12 | CRC < NCT | 0,0024  | 0,0366226 |
| XLOC_005<br>050 | CNIH2,RAB1B | chr11:66035863-66051685   | 79,619  | 172,485  | -1,12 | CRC < NCT | 0,00125 | 0,0233782 |
| XLOC_003<br>616 | ZFYVE27     | chr10:99496864-99520697   | 12,653  | 27,414   | -1,12 | CRC < NCT | 0,0017  | 0,0290257 |
| XLOC_024<br>735 | SFXN1       | chr5:174904845-174956872  | 14,879  | 32,275   | -1,12 | CRC < NCT | 0,0021  | 0,0336498 |
| XLOC_029<br>087 | LMTK2       | chr7:97734941-97838952    | 6,794   | 14,749   | -1,12 | CRC < NCT | 0,00235 | 0,0361928 |
| XLOC_006<br>798 | DYRK2       | chr12:68041852-68062784   | 7,926   | 17,210   | -1,12 | CRC < NCT | 0,00155 | 0,0273878 |
| XLOC_001<br>942 | BCL10       | chr1:85726836-85743771    | 12,276  | 26,678   | -1,12 | CRC < NCT | 0,00205 | 0,0331105 |
| XLOC_011<br>306 | NAA60       | chr16:3493665-3537112     | 21,964  | 47,749   | -1,12 | CRC < NCT | 0,0016  | 0,0279196 |
| XLOC_023<br>323 | ATP5I       | chr4:666224-668127        | 661,681 | 1439,870 | -1,12 | CRC < NCT | 0,00225 | 0,0351876 |
| XLOC_005<br>956 | ARRB1       | chr11:74970597-75062875   | 5,398   | 11,750   | -1,12 | CRC < NCT | 0,00145 | 0,0259223 |

|                 |                |                          |         |          |       |           |         |           |
|-----------------|----------------|--------------------------|---------|----------|-------|-----------|---------|-----------|
| XLOC_023<br>117 | HADH           | chr4:108745720-108956331 | 55,618  | 121,175  | -1,12 | CRC < NCT | 0,00265 | 0,0390961 |
| XLOC_017<br>796 | SUCLG1         | chr2:84650646-84686586   | 112,563 | 245,856  | -1,13 | CRC < NCT | 0,00105 | 0,0206545 |
| XLOC_032<br>282 | HINT2          | chr9:35812956-35815042   | 44,221  | 96,687   | -1,13 | CRC < NCT | 0,00355 | 0,0477391 |
| XLOC_010<br>306 | SLC27A2        | chr15:50474392-50528589  | 17,192  | 37,641   | -1,13 | CRC < NCT | 0,0022  | 0,0346434 |
| XLOC_031<br>339 | MROH6,NAPRT    | chr8:144648356-144661030 | 55,713  | 122,118  | -1,13 | CRC < NCT | 0,00175 | 0,0294656 |
| XLOC_000<br>732 | FAM46C         | chr1:118148603-118171011 | 4,699   | 10,299   | -1,13 | CRC < NCT | 0,0021  | 0,0336498 |
| XLOC_004<br>639 | STIM1          | chr11:3875260-4114442    | 13,726  | 30,111   | -1,13 | CRC < NCT | 0,00255 | 0,0382395 |
| XLOC_003<br>810 | KLF6           | chr10:3818071-3827473    | 44,478  | 97,715   | -1,14 | CRC < NCT | 0,00315 | 0,0437473 |
| XLOC_015<br>025 | NDUFA13,YJEFN3 | chr19:19624232-19648393  | 429,247 | 946,041  | -1,14 | CRC < NCT | 0,0025  | 0,037738  |
| XLOC_011<br>839 | ECI1           | chr16:2289255-2301678    | 50,285  | 110,829  | -1,14 | CRC < NCT | 0,0016  | 0,0279196 |
| XLOC_022<br>204 | PLOD2          | chr3:145787227-145879282 | 13,072  | 28,816   | -1,14 | CRC < NCT | 0,00265 | 0,0390961 |
| XLOC_018<br>171 | STK17B         | chr2:196998133-197039072 | 6,584   | 14,515   | -1,14 | CRC < NCT | 0,0011  | 0,0213843 |
| XLOC_033<br>531 | MTM1           | chrX:149737046-149841755 | 6,277   | 13,848   | -1,14 | CRC < NCT | 0,00375 | 0,0494799 |
| XLOC_015<br>106 | COX6B1         | chr19:36139124-36149686  | 494,006 | 1090,040 | -1,14 | CRC < NCT | 0,00315 | 0,0437473 |
| XLOC_015<br>801 | NDUFB7         | chr19:14676889-14682889  | 235,321 | 519,255  | -1,14 | CRC < NCT | 0,0013  | 0,0239449 |
| XLOC_033<br>660 | SH3KBP1        | chrX:19551920-19905744   | 20,918  | 46,181   | -1,14 | CRC < NCT | 0,00055 | 0,0131101 |
| XLOC_009<br>553 | EAPP           | chr14:34985134-35008943  | 36,688  | 81,140   | -1,15 | CRC < NCT | 0,00125 | 0,0233782 |
| XLOC_005<br>895 | CDK2AP2        | chr11:67273960-67276199  | 50,302  | 111,252  | -1,15 | CRC < NCT | 0,0015  | 0,0267114 |
| XLOC_026<br>056 | TMEM63B        | chr6:44095298-44123256   | 15,325  | 33,913   | -1,15 | CRC < NCT | 0,00075 | 0,0164378 |
| XLOC_032<br>014 | COQ4           | chr9:131084786-131096352 | 27,746  | 61,420   | -1,15 | CRC < NCT | 0,00225 | 0,0351876 |
| XLOC_004<br>989 | COX8A          | chr11:63742078-63744015  | 512,575 | 1135,360 | -1,15 | CRC < NCT | 0,00085 | 0,0178569 |
| XLOC_031<br>366 | TONSL,VPS28    | chr8:145648977-145669853 | 101,442 | 225,095  | -1,15 | CRC < NCT | 0,00105 | 0,0206545 |
| XLOC_010<br>478 | ABHD17C        | chr15:80987651-81047962  | 49,250  | 109,352  | -1,15 | CRC < NCT | 0,0008  | 0,0171221 |
| XLOC_010<br>782 | RAB27A         | chr15:55495161-55582589  | 9,470   | 21,030   | -1,15 | CRC < NCT | 0,002   | 0,03265   |
| XLOC_025<br>999 | CDKN1A         | chr6:36644236-36655116   | 135,341 | 300,797  | -1,15 | CRC < NCT | 0,0034  | 0,0463025 |
| XLOC_030<br>446 | PTK2B          | chr8:27168984-27316910   | 12,366  | 27,505   | -1,15 | CRC < NCT | 0,00055 | 0,0131101 |
| XLOC_002<br>024 | EPS8L3         | chr1:110292695-110307191 | 59,113  | 131,534  | -1,15 | CRC < NCT | 0,00085 | 0,0178569 |
| XLOC_003<br>826 | ASB13          | chr10:5680753-5708563    | 11,825  | 26,318   | -1,15 | CRC < NCT | 0,0021  | 0,0336498 |
| XLOC_014<br>836 | ARHGEF18       | chr19:7420491-7537680    | 9,973   | 22,198   | -1,15 | CRC < NCT | 0,003   | 0,0424399 |
| XLOC_015<br>674 | GPR108         | chr19:6729924-6737633    | 23,080  | 51,390   | -1,15 | CRC < NCT | 0,00055 | 0,0131101 |
| XLOC_020<br>328 | UQCR10         | chr22:30116343-30166918  | 117,269 | 261,407  | -1,16 | CRC < NCT | 0,0017  | 0,0290257 |
| XLOC_013<br>076 | UBALD2         | chr17:74261285-74267379  | 39,454  | 87,967   | -1,16 | CRC < NCT | 0,0007  | 0,0155855 |
| XLOC_012<br>836 | GRN            | chr17:42422453-42430481  | 155,158 | 345,977  | -1,16 | CRC < NCT | 0,00205 | 0,0331105 |
| XLOC_021<br>450 | PLS1           | chr3:142315228-142432705 | 51,962  | 115,973  | -1,16 | CRC < NCT | 0,0028  | 0,0405866 |
| XLOC_016<br>734 | LGALS1         | chr2:64672658-64688518   | 5,946   | 13,280   | -1,16 | CRC < NCT | 0,0022  | 0,0346434 |
| XLOC_015<br>921 | CEBPA          | chr19:33790601-33793507  | 24,241  | 54,410   | -1,17 | CRC < NCT | 0,0027  | 0,0395776 |
| XLOC_016<br>246 | ETFB           | chr19:51848408-51869672  | 104,049 | 234,149  | -1,17 | CRC < NCT | 0,00105 | 0,0206545 |
| XLOC_026<br>343 | RAB32          | chr6:146864827-146876086 | 30,248  | 68,179   | -1,17 | CRC < NCT | 0,00165 | 0,0284652 |

|                 |                                |                           |         |          |       |           |         |           |
|-----------------|--------------------------------|---------------------------|---------|----------|-------|-----------|---------|-----------|
| XLOC_012<br>057 | PYCARD                         | chr16:31210639-31215432   | 58,600  | 132,121  | -1,17 | CRC < NCT | 0,00245 | 0,0372298 |
| XLOC_020<br>363 | TOM1                           | chr22:35695267-35744401   | 19,429  | 43,847   | -1,17 | CRC < NCT | 0,00085 | 0,0178569 |
| XLOC_013<br>496 | GSDMB,ORMDL3                   | chr17:38060845-38083884   | 89,115  | 201,147  | -1,17 | CRC < NCT | 0,00065 | 0,0147056 |
| XLOC_012<br>676 | ADAP2,RNF135                   | chr17:29248753-29326930   | 12,252  | 27,656   | -1,17 | CRC < NCT | 0,0038  | 0,049887  |
| XLOC_010<br>999 | AP3S2,ARPIN,C15orf38-<br>AP3S2 | chr15:90373648-90456234   | 14,593  | 32,974   | -1,18 | CRC < NCT | 0,00035 | 0,0094833 |
| XLOC_018<br>724 | -                              | chr2:183936524-183936787  | 631,580 | 1429,530 | -1,18 | CRC < NCT | 0,0011  | 0,0213843 |
| XLOC_029<br>006 | CLIP2                          | chr7:73703804-73822852    | 9,765   | 22,121   | -1,18 | CRC < NCT | 0,00055 | 0,0131101 |
| XLOC_004<br>595 | EPS8L2,TMEM80                  | chr11:644206-727729       | 38,664  | 87,826   | -1,18 | CRC < NCT | 0,00185 | 0,0307518 |
| XLOC_014<br>843 | STXBP2                         | chr19:7701986-7712761     | 46,662  | 106,027  | -1,18 | CRC < NCT | 0,0005  | 0,0123209 |
| XLOC_015<br>499 | EPN1                           | chr19:56186505-56249768   | 54,914  | 124,846  | -1,18 | CRC < NCT | 0,0011  | 0,0213843 |
| XLOC_021<br>975 | SUCLG2                         | chr3:67291046-67998136    | 46,709  | 106,290  | -1,19 | CRC < NCT | 0,0005  | 0,0123209 |
| XLOC_015<br>648 | PLIN3                          | chr19:4838309-4867780     | 43,509  | 99,167   | -1,19 | CRC < NCT | 0,0003  | 0,0084946 |
| XLOC_016<br>009 | -                              | chr19:40448541-40450040   | 13,933  | 31,814   | -1,19 | CRC < NCT | 0,0024  | 0,0366226 |
| XLOC_025<br>234 | PCDH1                          | chr5:141229669-141258797  | 18,722  | 42,751   | -1,19 | CRC < NCT | 0,00155 | 0,0273878 |
| XLOC_020<br>591 | DDT                            | chr22:24309025-24322019   | 83,261  | 190,187  | -1,19 | CRC < NCT | 0,00175 | 0,0294656 |
| XLOC_007<br>011 | COX6A1                         | chr12:120867415-120878694 | 209,909 | 479,658  | -1,19 | CRC < NCT | 0,0005  | 0,0123209 |
| XLOC_014<br>542 | SMAD7                          | chr18:46446221-46478429   | 8,804   | 20,184   | -1,20 | CRC < NCT | 0,0013  | 0,0239449 |
| XLOC_000<br>989 | MGST3                          | chr1:165600109-165625372  | 115,723 | 266,080  | -1,20 | CRC < NCT | 0,00055 | 0,0131101 |
| XLOC_000<br>274 | SES2                           | chr1:28585962-28609007    | 7,934   | 18,305   | -1,21 | CRC < NCT | 0,0014  | 0,0253013 |
| XLOC_025<br>163 | SHROOM1                        | chr5:132157301-132167441  | 8,177   | 18,878   | -1,21 | CRC < NCT | 0,00195 | 0,0320923 |
| XLOC_019<br>011 | CHMP4B                         | chr20:32399109-32442173   | 163,635 | 377,883  | -1,21 | CRC < NCT | 0,001   | 0,0199726 |
| XLOC_017<br>241 | SPATS2L                        | chr2:201170603-201346986  | 18,072  | 41,751   | -1,21 | CRC < NCT | 0,0002  | 0,006387  |
| XLOC_021<br>862 | UQCRC1                         | chr3:48636431-48647098    | 161,530 | 373,792  | -1,21 | CRC < NCT | 0,0016  | 0,0279196 |
| XLOC_014<br>621 | PQLC1                          | chr18:77662358-77711653   | 16,873  | 39,073   | -1,21 | CRC < NCT | 0,00095 | 0,0192909 |
| XLOC_009<br>803 | CLMN                           | chr14:95648273-95786245   | 5,879   | 13,169   | -1,21 | CRC < NCT | 0,00265 | 0,0390961 |
| XLOC_012<br>297 | CHMP1A                         | chr16:89710822-89739686   | 40,800  | 94,539   | -1,21 | CRC < NCT | 0,0002  | 0,006387  |
| XLOC_011<br>465 | TMEM219                        | chr16:29973339-29984375   | 100,581 | 233,236  | -1,21 | CRC < NCT | 0,0006  | 0,0139198 |
| XLOC_006<br>062 | CARD16,CARD17,CASP1            | chr11:104896115-104972165 | 45,593  | 105,731  | -1,21 | CRC < NCT | 0,00285 | 0,0411153 |
| XLOC_011<br>042 | VIMP                           | chr15:101811075-101817932 | 62,809  | 145,699  | -1,21 | CRC < NCT | 0,00025 | 0,0074979 |
| XLOC_029<br>500 | C7orf31,CYCS                   | chr7:25158167-25220009    | 38,462  | 89,227   | -1,21 | CRC < NCT | 0,00055 | 0,0131101 |
| XLOC_031<br>880 | TDRD7                          | chr9:100174301-100258408  | 10,151  | 23,556   | -1,21 | CRC < NCT | 0,001   | 0,0199726 |
| XLOC_000<br>183 | MINOS1,MINOS1-<br>NBL1,NBL1    | chr1:19923470-19984949    | 149,062 | 346,183  | -1,22 | CRC < NCT | 0,00185 | 0,0307518 |
| XLOC_000<br>046 | TNFRSF14                       | chr1:2473023-2497277      | 17,017  | 39,534   | -1,22 | CRC < NCT | 0,00145 | 0,0259223 |
| XLOC_014<br>751 | MIDN                           | chr19:1248407-1259145     | 26,473  | 61,812   | -1,22 | CRC < NCT | 0,00035 | 0,0094833 |
| XLOC_009<br>202 | CIPC                           | chr14:77564577-77583754   | 6,393   | 14,951   | -1,23 | CRC < NCT | 0,00105 | 0,0206545 |
| XLOC_009<br>149 | SUSD6                          | chr14:70078309-70182033   | 9,002   | 21,061   | -1,23 | CRC < NCT | 0,00045 | 0,0114127 |
| XLOC_016<br>046 | DEDD2                          | chr19:42701468-42724304   | 20,355  | 47,661   | -1,23 | CRC < NCT | 0,0004  | 0,01042   |
| XLOC_000<br>054 | TPRG1L                         | chr1:3541555-3546696      | 35,867  | 84,114   | -1,23 | CRC < NCT | 0,00025 | 0,0074979 |

|                 |                 |                           |         |          |       |           |         |           |
|-----------------|-----------------|---------------------------|---------|----------|-------|-----------|---------|-----------|
| XLOC_004<br>591 | RASSF7          | chr11:535885-564059       | 42,924  | 100,706  | -1,23 | CRC < NCT | 0,0013  | 0,0239449 |
| XLOC_001<br>611 | IFNLR1,IL22RA1  | chr1:24446255-24513765    | 13,805  | 32,414   | -1,23 | CRC < NCT | 0,00295 | 0,0419277 |
| XLOC_013<br>362 | FAM83G          | chr17:18853988-18950465   | 10,305  | 24,207   | -1,23 | CRC < NCT | 0,0023  | 0,035694  |
| XLOC_020<br>294 | ADORA2A,SPECC1L | chr22:24666784-24890783   | 8,932   | 20,996   | -1,23 | CRC < NCT | 0,0009  | 0,0185023 |
| XLOC_011<br>401 | ANKS4B          | chr16:21237525-21329912   | 11,644  | 27,421   | -1,24 | CRC < NCT | 0,00235 | 0,0361928 |
| XLOC_025<br>182 | CXCL14          | chr5:134906370-134914969  | 56,021  | 131,961  | -1,24 | CRC < NCT | 0,00215 | 0,0341212 |
| XLOC_010<br>904 | SCAMP2          | chr15:75136019-75165733   | 53,483  | 126,017  | -1,24 | CRC < NCT | 0,0002  | 0,006387  |
| XLOC_005<br>391 | ST14            | chr11:130029645-130081837 | 140,472 | 331,187  | -1,24 | CRC < NCT | 0,0023  | 0,035694  |
| XLOC_000<br>052 | ARHGFE16        | chr1:3371143-3397713      | 19,314  | 45,551   | -1,24 | CRC < NCT | 0,0004  | 0,010142  |
| XLOC_014<br>750 | ATP5D           | chr19:1239374-1244830     | 154,236 | 363,814  | -1,24 | CRC < NCT | 0,00095 | 0,0192909 |
| XLOC_005<br>589 | USH1C           | chr11:17515441-17565963   | 81,151  | 191,845  | -1,24 | CRC < NCT | 0,00175 | 0,0294656 |
| XLOC_014<br>490 | DSC2,DSC3       | chr18:28569330-28742819   | 24,910  | 58,912   | -1,24 | CRC < NCT | 0,003   | 0,0424399 |
| XLOC_024<br>267 | PTGER4          | chr5:40678569-40694043    | 7,415   | 17,558   | -1,24 | CRC < NCT | 0,0013  | 0,0239449 |
| XLOC_006<br>456 | CD27,TAPBPL     | chr12:6548166-6582174     | 26,671  | 63,217   | -1,25 | CRC < NCT | 0,0034  | 0,0463025 |
| XLOC_011<br>995 | ARHGAP17        | chr16:24930695-25026704   | 13,648  | 32,395   | -1,25 | CRC < NCT | 0,0001  | 0,003647  |
| XLOC_012<br>509 | ACADVL          | chr17:7093209-7138248     | 138,714 | 329,607  | -1,25 | CRC < NCT | 0,0013  | 0,0239449 |
| XLOC_013<br>044 | GPRC5C          | chr17:72426932-72447821   | 30,053  | 71,464   | -1,25 | CRC < NCT | 0,00175 | 0,0294656 |
| XLOC_005<br>828 | CDC42BPG        | chr11:64590539-64612148   | 6,790   | 16,147   | -1,25 | CRC < NCT | 0,00185 | 0,0307518 |
| XLOC_011<br>726 | COX4I1          | chr16:85833172-85840607   | 537,517 | 1278,990 | -1,25 | CRC < NCT | 0,0028  | 0,0405866 |
| XLOC_004<br>007 | A1CF            | chr10:52559027-52645462   | 2,722   | 6,484    | -1,25 | CRC < NCT | 0,00195 | 0,0320923 |
| XLOC_015<br>904 | UQCRRF51        | chr19:29695715-29704176   | 105,357 | 250,985  | -1,25 | CRC < NCT | 0,00025 | 0,0074979 |
| XLOC_026<br>702 | BAK1            | chr6:33538522-33548225    | 19,347  | 46,157   | -1,25 | CRC < NCT | 0,00045 | 0,0114127 |
| XLOC_001<br>603 | ID3             | chr1:23884420-23886285    | 60,435  | 144,382  | -1,26 | CRC < NCT | 0,00055 | 0,0131101 |
| XLOC_028<br>787 | ARL4A           | chr7:12726451-12732753    | 19,020  | 45,477   | -1,26 | CRC < NCT | 0,0001  | 0,003647  |
| XLOC_032<br>031 | DOLPP1          | chr9:131843226-131852726  | 12,864  | 30,777   | -1,26 | CRC < NCT | 0,00085 | 0,0178569 |
| XLOC_001<br>129 | C1orf106        | chr1:200860626-200884873  | 15,226  | 36,450   | -1,26 | CRC < NCT | 0,0003  | 0,0084946 |
| XLOC_032<br>156 | PLGRKT          | chr9:5357966-5439392      | 43,601  | 104,385  | -1,26 | CRC < NCT | 0,0005  | 0,0123209 |
| XLOC_020<br>479 | GRAMD4          | chr22:46972081-47075688   | 10,024  | 24,017   | -1,26 | CRC < NCT | 0,00025 | 0,0074979 |
| XLOC_005<br>478 | RHOG            | chr11:3848193-3862215     | 41,719  | 99,978   | -1,26 | CRC < NCT | 0,00015 | 0,0050841 |
| XLOC_016<br>020 | SERTAD3         | chr19:40946747-40950610   | 18,314  | 44,055   | -1,27 | CRC < NCT | 0,0003  | 0,0084946 |
| XLOC_008<br>997 | PCK2            | chr14:24563339-24573383   | 36,124  | 87,082   | -1,27 | CRC < NCT | 0,0003  | 0,0084946 |
| XLOC_032<br>453 | SLC35D2         | chr9:99075640-99146096    | 33,798  | 81,785   | -1,27 | CRC < NCT | 0,00035 | 0,0094833 |
| XLOC_005<br>584 | PLEKHA7         | chr11:16798788-17074591   | 5,530   | 13,383   | -1,27 | CRC < NCT | 0,00075 | 0,0164378 |
| XLOC_017<br>868 | MGAT4A          | chr2:99235568-99347589    | 11,938  | 28,919   | -1,28 | CRC < NCT | 0,0009  | 0,0185023 |
| XLOC_002<br>993 | -               | chr1:157043249-157044472  | 24,442  | 59,221   | -1,28 | CRC < NCT | 0,0007  | 0,0155855 |
| XLOC_026<br>524 | MBOAT1          | chr6:20099866-20212892    | 5,748   | 13,932   | -1,28 | CRC < NCT | 0,00085 | 0,0178569 |
| XLOC_018<br>220 | FZD5            | chr2:208576194-208637145  | 8,275   | 20,125   | -1,28 | CRC < NCT | 0,0034  | 0,0463025 |
| XLOC_000<br>250 | CEP85,SH3BGR13  | chr1:26560643-26608125    | 288,041 | 701,993  | -1,29 | CRC < NCT | 0,0008  | 0,0171221 |



|                 |                              |                               |         |          |       |           |          |           |
|-----------------|------------------------------|-------------------------------|---------|----------|-------|-----------|----------|-----------|
| XLOC_004<br>351 | ECHS1                        | chr10:135175986-135186908     | 145,560 | 355,070  | -1,29 | CRC < NCT | 0,00065  | 0,0147056 |
| XLOC_017<br>016 | MYO7B                        | chr2:128293253-128395512      | 23,261  | 56,797   | -1,29 | CRC < NCT | 0,00145  | 0,0259223 |
| XLOC_026<br>238 | MARCKS                       | chr6:114177394-114186154      | 33,767  | 82,707   | -1,29 | CRC < NCT | 0,0002   | 0,006387  |
| XLOC_010<br>923 | TSPAN3                       | chr15:77331323-77364709       | 118,426 | 290,188  | -1,29 | CRC < NCT | 0,0019   | 0,0313827 |
| XLOC_023<br>458 | ATP8A1                       | chr4:42410262-42659142        | 6,053   | 14,835   | -1,29 | CRC < NCT | 0,0008   | 0,0171221 |
| XLOC_016<br>897 | COX5B                        | chr2:98261912-98264657        | 719,250 | 1768,620 | -1,30 | CRC < NCT | 0,0014   | 0,0253013 |
| XLOC_033<br>066 | RAB9A                        | chrX:13707221-13729067        | 23,751  | 58,555   | -1,30 | CRC < NCT | 0,00025  | 0,0074979 |
| XLOC_001<br>868 | CYP2J2                       | chr1:60358971-60392469        | 13,799  | 34,052   | -1,30 | CRC < NCT | 0,0008   | 0,0171221 |
| XLOC_013<br>659 | PRR15L                       | chr17:46018888-46036311       | 106,081 | 262,780  | -1,31 | CRC < NCT | 0,00185  | 0,0307518 |
| XLOC_030<br>448 | EPHX2                        | chr8:27348518-27402439        | 22,196  | 54,996   | -1,31 | CRC < NCT | 0,00095  | 0,0192909 |
| XLOC_011<br>461 | MAZ,MVP,PAGR1,PRRT2          | chr16:29817356-29861063       | 188,548 | 467,508  | -1,31 | CRC < NCT | 0,00355  | 0,0477391 |
| XLOC_029<br>866 | WASL                         | chr7:123319529-123391293      | 16,266  | 40,366   | -1,31 | CRC < NCT | 0,0001   | 0,003647  |
| XLOC_026<br>468 | ECI2                         | chr6:4068592-4135831          | 30,830  | 76,625   | -1,31 | CRC < NCT | 0,00085  | 0,0178569 |
| XLOC_020<br>475 | TTC38                        | chr22:46663839-46690990       | 28,723  | 71,413   | -1,31 | CRC < NCT | 0,00025  | 0,0074979 |
| XLOC_027<br>698 | HLA-DPB1                     | chr6_cox_hap2:4476525-4501576 | 13,031  | 32,419   | -1,31 | CRC < NCT | 0,00165  | 0,0284652 |
| XLOC_012<br>906 | PDK2                         | chr17:48172100-48207246       | 15,615  | 38,855   | -1,32 | CRC < NCT | 0,001    | 0,0199726 |
| XLOC_031<br>885 | NANS                         | chr9:100807717-100881900      | 94,392  | 235,027  | -1,32 | CRC < NCT | 0,00155  | 0,0273878 |
| XLOC_018<br>345 | RAB17                        | chr2:238482947-238504835      | 15,605  | 38,909   | -1,32 | CRC < NCT | 0,0014   | 0,0253013 |
| XLOC_020<br>426 | ACO2                         | chr22:41855708-41940610       | 56,386  | 140,612  | -1,32 | CRC < NCT | 0,00085  | 0,0178569 |
| XLOC_004<br>236 | COL17A1                      | chr10:105791042-105845869     | 41,663  | 104,070  | -1,32 | CRC < NCT | 0,0017   | 0,0290257 |
| XLOC_015<br>252 | RELB                         | chr19:45504703-45542097       | 10,752  | 26,923   | -1,32 | CRC < NCT | 0,001    | 0,0199726 |
| XLOC_002<br>082 | IGSF3                        | chr1:117115963-117210401      | 3,121   | 7,819    | -1,32 | CRC < NCT | 0,00075  | 0,0164378 |
| XLOC_014<br>351 | NEDD4L                       | chr18:55711602-56068882       | 6,772   | 16,967   | -1,33 | CRC < NCT | 0,0001   | 0,003647  |
| XLOC_020<br>700 | BAIAP2L2                     | chr22:38480888-38507208       | 21,822  | 54,674   | -1,33 | CRC < NCT | 0,0004   | 0,010142  |
| XLOC_004<br>711 | ADM                          | chr11:10326526-10328949       | 25,920  | 65,082   | -1,33 | CRC < NCT | 0,0008   | 0,0171221 |
| XLOC_015<br>190 | EGLN2,MIA,RAB4B              | chr19:41275773-41316757       | 54,899  | 137,898  | -1,33 | CRC < NCT | 0,0002   | 0,006387  |
| XLOC_030<br>784 | GSDMD                        | chr8:144519822-144645233      | 43,011  | 108,221  | -1,33 | CRC < NCT | 0,00035  | 0,0094833 |
| XLOC_020<br>925 | IL17RE                       | chr3:9943697-9958084          | 14,846  | 37,481   | -1,34 | CRC < NCT | 0,0002   | 0,006387  |
| XLOC_000<br>254 | RPS6KA1                      | chr1:26856248-26901523        | 31,573  | 79,813   | -1,34 | CRC < NCT | 0,0002   | 0,006387  |
| XLOC_020<br>938 | PPARG                        | chr3:12329348-12476055        | 42,846  | 108,643  | -1,34 | CRC < NCT | 5,00E-05 | 0,0020443 |
| XLOC_023<br>307 | TLR3                         | chr4:186989988-187009433      | 3,877   | 9,832    | -1,34 | CRC < NCT | 0,0029   | 0,0416718 |
| XLOC_011<br>428 | LCMT1                        | chr16:25043061-25189554       | 28,321  | 72,009   | -1,35 | CRC < NCT | 0,00035  | 0,0094833 |
| XLOC_025<br>056 | EDIL3                        | chr5:83235518-83713718        | 2,699   | 6,881    | -1,35 | CRC < NCT | 0,0035   | 0,0472409 |
| XLOC_012<br>173 | CTRL,LCAT,PSMB10,SLC12A<br>4 | chr16:67927174-68002597       | 112,330 | 287,305  | -1,35 | CRC < NCT | 0,00085  | 0,0178569 |
| XLOC_004<br>756 | HTATIP2                      | chr11:20385230-20405550       | 63,899  | 163,760  | -1,36 | CRC < NCT | 5,00E-05 | 0,0020443 |
| XLOC_021<br>787 | LRRFIP2                      | chr3:37026570-37218313        | 15,786  | 40,482   | -1,36 | CRC < NCT | 0,0022   | 0,0346434 |
| XLOC_031<br>886 | GALNT12                      | chr9:101569610-101613552      | 22,987  | 58,955   | -1,36 | CRC < NCT | 0,0001   | 0,003647  |
| XLOC_029<br>927 | PARP12                       | chr7:139722297-139763759      | 10,180  | 26,128   | -1,36 | CRC < NCT | 0,00015  | 0,0050841 |

|                 |               |                           |         |         |       |           |          |           |
|-----------------|---------------|---------------------------|---------|---------|-------|-----------|----------|-----------|
| XLOC_001<br>790 | HECTD3        | chr1:45468050-45481341    | 16,711  | 42,993  | -1,36 | CRC < NCT | 0,00165  | 0,0284652 |
| XLOC_011<br>571 | CPNE2         | chr16:57126454-57181878   | 15,698  | 40,472  | -1,37 | CRC < NCT | 0,0003   | 0,0084946 |
| XLOC_017<br>755 | PRADC1        | chr2:73455131-73460658    | 19,723  | 50,967  | -1,37 | CRC < NCT | 0,0009   | 0,0185023 |
| XLOC_030<br>424 | SORBS3        | chr8:22407433-22433011    | 23,695  | 61,281  | -1,37 | CRC < NCT | 0,0003   | 0,0084946 |
| XLOC_029<br>402 | PDGFA         | chr7:536075-564869        | 7,221   | 18,704  | -1,37 | CRC < NCT | 0,00065  | 0,0147056 |
| XLOC_011<br>586 | MMP15         | chr16:58059281-58080807   | 17,839  | 46,221  | -1,37 | CRC < NCT | 0,0006   | 0,0139198 |
| XLOC_008<br>433 | CDX2,URAD     | chr13:28532462-28563098   | 73,949  | 191,780 | -1,37 | CRC < NCT | 0,00065  | 0,0147056 |
| XLOC_003<br>263 | OPTN          | chr10:13141907-13201897   | 25,837  | 67,888  | -1,38 | CRC < NCT | 5,00E-05 | 0,0020443 |
| XLOC_031<br>613 | SLC1A1        | chr9:4489692-4587475      | 8,569   | 22,269  | -1,38 | CRC < NCT | 0,00045  | 0,0114127 |
| XLOC_032<br>133 | MRPL41        | chr9:140446308-140448160  | 108,730 | 283,062 | -1,38 | CRC < NCT | 0,00015  | 0,0050841 |
| XLOC_006<br>984 | OAS1,OAS3     | chr12:113344496-113412164 | 77,951  | 203,433 | -1,38 | CRC < NCT | 0,0013   | 0,0239449 |
| XLOC_021<br>345 | DIRC2         | chr3:122513888-122599989  | 5,017   | 13,103  | -1,38 | CRC < NCT | 0,00065  | 0,0147056 |
| XLOC_012<br>918 | ABCC3         | chr17:48711987-48769063   | 20,464  | 52,515  | -1,39 | CRC < NCT | 0,0001   | 0,003647  |
| XLOC_000<br>565 | PRKACB        | chr1:84543657-84705471    | 15,786  | 41,315  | -1,39 | CRC < NCT | 0,0005   | 0,0123209 |
| XLOC_001<br>835 | ECHDC2        | chr1:53361581-53387493    | 14,867  | 38,935  | -1,39 | CRC < NCT | 0,0002   | 0,006387  |
| XLOC_020<br>634 | TBC1D10A      | chr22:30687978-30722955   | 8,799   | 23,064  | -1,39 | CRC < NCT | 0,0009   | 0,0185023 |
| XLOC_011<br>117 | -             | chr15:56365655-56366133   | 32,147  | 84,277  | -1,39 | CRC < NCT | 0,00315  | 0,0437473 |
| XLOC_006<br>533 | H2AFJ         | chr12:14926153-14930936   | 24,953  | 65,584  | -1,39 | CRC < NCT | 0,0002   | 0,006387  |
| XLOC_001<br>606 | HMGCL         | chr1:24128355-24165102    | 32,570  | 85,701  | -1,40 | CRC < NCT | 0,0003   | 0,0084946 |
| XLOC_023<br>341 | LETM1         | chr4:1813118-1858232      | 10,093  | 26,577  | -1,40 | CRC < NCT | 5,00E-05 | 0,0020443 |
| XLOC_029<br>113 | LAMTOR4       | chr7:99728304-99756354    | 175,076 | 461,914 | -1,40 | CRC < NCT | 0,0011   | 0,0213843 |
| XLOC_004<br>325 | CLRN3         | chr10:129674211-129691211 | 78,110  | 206,149 | -1,40 | CRC < NCT | 0,0002   | 0,006387  |
| XLOC_006<br>173 | SIAE          | chr11:124492741-124568400 | 43,681  | 115,372 | -1,40 | CRC < NCT | 0,00215  | 0,0341212 |
| XLOC_032<br>248 | KIAA1161      | chr9:34366090-34376971    | 8,657   | 22,888  | -1,40 | CRC < NCT | 5,00E-05 | 0,0020443 |
| XLOC_019<br>789 | IFNAR2,IL10RB | chr21:34602199-34669717   | 34,532  | 91,547  | -1,41 | CRC < NCT | 0,0001   | 0,003647  |
| XLOC_000<br>311 | KIAA1522      | chr1:33207233-33324480    | 37,743  | 100,083 | -1,41 | CRC < NCT | 0,0032   | 0,0443068 |
| XLOC_016<br>285 | LENG1,TMC4    | chr19:54641435-54676967   | 40,880  | 108,461 | -1,41 | CRC < NCT | 0,0009   | 0,0185023 |
| XLOC_002<br>162 | FAM63A        | chr1:150954111-150980854  | 7,185   | 19,064  | -1,41 | CRC < NCT | 0,00085  | 0,0178569 |
| XLOC_010<br>906 | COX5A,RPP25   | chr15:75212616-75287738   | 261,686 | 694,363 | -1,41 | CRC < NCT | 0,00035  | 0,0094833 |
| XLOC_021<br>984 | EIF4E3        | chr3:71728272-71804328    | 3,909   | 10,380  | -1,41 | CRC < NCT | 0,00035  | 0,0094833 |
| XLOC_018<br>267 | NHEJ1,SLC23A3 | chr2:219933061-220034873  | 12,400  | 32,929  | -1,41 | CRC < NCT | 0,0003   | 0,0084946 |
| XLOC_002<br>159 | CTSS          | chr1:150701540-150738482  | 64,634  | 171,695 | -1,41 | CRC < NCT | 0,00015  | 0,0050841 |
| XLOC_025<br>249 | PRELID2       | chr5:145082976-145215103  | 5,895   | 15,699  | -1,41 | CRC < NCT | 0,0014   | 0,0253013 |
| XLOC_016<br>364 | CHMP2A,UBE2M  | chr19:59062921-59086353   | 169,883 | 452,784 | -1,41 | CRC < NCT | 0,00015  | 0,0050841 |
| XLOC_012<br>041 | SEPHS2        | chr16:30454769-30458104   | 51,045  | 136,227 | -1,42 | CRC < NCT | 5,00E-05 | 0,0020443 |
| XLOC_010<br>515 | PDE8A         | chr15:85523375-85682437   | 11,268  | 30,076  | -1,42 | CRC < NCT | 0,00025  | 0,0074979 |
| XLOC_008<br>437 | SLC46A3       | chr13:29274211-29293373   | 10,843  | 28,949  | -1,42 | CRC < NCT | 0,00045  | 0,0114127 |
| XLOC_026<br>883 | FAM46A        | chr6:82454828-82462428    | 8,854   | 23,694  | -1,42 | CRC < NCT | 0,0006   | 0,0139198 |

|                 |               |                               |         |         |       |           |          |           |
|-----------------|---------------|-------------------------------|---------|---------|-------|-----------|----------|-----------|
| XLOC_017<br>252 | STRADB        | chr2:202316391-202345606      | 6,279   | 16,838  | -1,42 | CRC < NCT | 0,0006   | 0,0139198 |
| XLOC_017<br>773 | DQX1          | chr2:74745240-74753465        | 5,477   | 14,723  | -1,43 | CRC < NCT | 0,0028   | 0,0405866 |
| XLOC_026<br>040 | KLC4          | chr6:43005354-43042876        | 25,207  | 67,812  | -1,43 | CRC < NCT | 0,0032   | 0,0443068 |
| XLOC_005<br>130 | P2RY2         | chr11:72929342-72953472       | 1,077   | 2,900   | -1,43 | CRC < NCT | 0,0024   | 0,0366226 |
| XLOC_012<br>846 | ACBD4         | chr17:43209966-43221544       | 5,375   | 14,494  | -1,43 | CRC < NCT | 0,0024   | 0,0366226 |
| XLOC_015<br>754 | ACP5          | chr19:11685474-11689801       | 26,222  | 70,810  | -1,43 | CRC < NCT | 0,00025  | 0,0074979 |
| XLOC_013<br>492 | PGAP3         | chr17:37827373-37844323       | 13,921  | 37,782  | -1,44 | CRC < NCT | 0,0003   | 0,0084946 |
| XLOC_032<br>631 | CRAT          | chr9:131857005-131873070      | 18,439  | 50,299  | -1,45 | CRC < NCT | 5,00E-05 | 0,0020443 |
| XLOC_026<br>099 | LRR1          | chr6:53610598-53789519        | 13,780  | 37,591  | -1,45 | CRC < NCT | 5,00E-05 | 0,0020443 |
| XLOC_032<br>385 | FRMD3         | chr9:85834232-86153348        | 2,227   | 6,082   | -1,45 | CRC < NCT | 0,00345  | 0,046739  |
| XLOC_019<br>020 | ACSS2         | chr20:33462761-33515769       | 44,820  | 122,432 | -1,45 | CRC < NCT | 0,0003   | 0,0084946 |
| XLOC_032<br>224 | MOB3B         | chr9:27325073-27529850        | 4,369   | 11,979  | -1,46 | CRC < NCT | 5,00E-05 | 0,0020443 |
| XLOC_003<br>780 | PWWP2B        | chr10:134210701-134231363     | 16,620  | 45,578  | -1,46 | CRC < NCT | 0,0004   | 0,01042   |
| XLOC_015<br>647 | TICAM1        | chr19:4815922-4832129         | 10,389  | 28,497  | -1,46 | CRC < NCT | 5,00E-05 | 0,0020443 |
| XLOC_025<br>984 | PPARD         | chr6:35310321-35395999        | 15,368  | 42,293  | -1,46 | CRC < NCT | 0,00025  | 0,0074979 |
| XLOC_013<br>213 | P2RX5,TAX1BP3 | chr17:3539761-3599698         | 118,122 | 326,820 | -1,47 | CRC < NCT | 0,0002   | 0,006387  |
| XLOC_001<br>257 | CAPN2         | chr1:223889294-223963786      | 68,757  | 190,270 | -1,47 | CRC < NCT | 5,00E-05 | 0,0020443 |
| XLOC_004<br>155 | PDLIM1        | chr10:96997324-97050905       | 166,415 | 460,714 | -1,47 | CRC < NCT | 0,0001   | 0,003647  |
| XLOC_009<br>253 | IFI27L1       | chr14:94547632-94569062       | 13,519  | 37,447  | -1,47 | CRC < NCT | 0,00255  | 0,0382395 |
| XLOC_017<br>330 | CYP27A1       | chr2:219646471-219680016      | 17,113  | 47,482  | -1,47 | CRC < NCT | 0,00015  | 0,0050841 |
| XLOC_014<br>754 | EFNA2         | chr19:1281807-1301429         | 9,280   | 25,749  | -1,47 | CRC < NCT | 0,0004   | 0,01042   |
| XLOC_003<br>857 | PHYH          | chr10:13319795-13342130       | 27,074  | 75,244  | -1,47 | CRC < NCT | 5,00E-05 | 0,0020443 |
| XLOC_024<br>375 | F2RL1         | chr5:76114408-76133281        | 29,154  | 81,035  | -1,47 | CRC < NCT | 5,00E-05 | 0,0020443 |
| XLOC_000<br>389 | TMEM125       | chr1:43735603-43739679        | 19,059  | 52,996  | -1,48 | CRC < NCT | 0,00025  | 0,0074979 |
| XLOC_032<br>269 | FAM214B       | chr9:35104112-35116303        | 9,517   | 26,505  | -1,48 | CRC < NCT | 5,00E-05 | 0,0020443 |
| XLOC_000<br>040 | PRKCZ         | chr1:1979959-2144777          | 11,168  | 31,120  | -1,48 | CRC < NCT | 0,00365  | 0,0486178 |
| XLOC_022<br>085 | HGD           | chr3:120347012-120405386      | 7,796   | 21,773  | -1,48 | CRC < NCT | 0,0013   | 0,0239449 |
| XLOC_021<br>154 | PRKCD         | chr3:53190175-53226733        | 21,163  | 59,303  | -1,49 | CRC < NCT | 5,00E-05 | 0,0020443 |
| XLOC_017<br>460 | FAM110C       | chr2:36329-46907              | 6,070   | 17,021  | -1,49 | CRC < NCT | 0,0024   | 0,0366226 |
| XLOC_032<br>625 | ZER1          | chr9:131486738-131534748      | 10,365  | 29,080  | -1,49 | CRC < NCT | 0,0001   | 0,003647  |
| XLOC_015<br>601 | PLEKHJ1       | chr19:2163833-2260525         | 69,013  | 193,917 | -1,49 | CRC < NCT | 0,0026   | 0,0386713 |
| XLOC_031<br>775 | GDA           | chr9:74729510-74867200        | 7,879   | 22,160  | -1,49 | CRC < NCT | 0,00045  | 0,0114127 |
| XLOC_032<br>506 | EPB41L4B      | chr9:111934107-112083501      | 21,262  | 59,975  | -1,50 | CRC < NCT | 5,00E-05 | 0,0020443 |
| XLOC_027<br>750 | HLA-B,HLA-C   | chr6_cox_hap2:2749774-2837927 | 97,812  | 245,225 | -1,50 | CRC < NCT | 0,00155  | 0,0273878 |
| XLOC_000<br>424 | MAST2         | chr1:46269265-46501906        | 13,054  | 36,878  | -1,50 | CRC < NCT | 5,00E-05 | 0,0020443 |
| XLOC_031<br>023 | SLC20A2       | chr8:42273858-42409895        | 18,761  | 53,044  | -1,50 | CRC < NCT | 0,0008   | 0,0171221 |
| XLOC_000<br>376 | RIMKLA        | chr1:42846467-42891556        | 1,050   | 2,969   | -1,50 | CRC < NCT | 0,0007   | 0,0155855 |
| XLOC_023<br>588 | HSD17B11      | chr4:88256817-88312784        | 72,149  | 204,487 | -1,50 | CRC < NCT | 5,00E-05 | 0,0020443 |

|                 |                     |                           |         |         |       |           |          |           |
|-----------------|---------------------|---------------------------|---------|---------|-------|-----------|----------|-----------|
| XLOC_009<br>270 | BDKRB2              | chr14:96671020-96711122   | 5,803   | 16,480  | -1,51 | CRC < NCT | 0,0004   | 0,01042   |
| XLOC_032<br>706 | AGPAT2              | chr9:139567594-139581911  | 118,631 | 337,241 | -1,51 | CRC < NCT | 5,00E-05 | 0,0020443 |
| XLOC_017<br>964 | TFCP2L1             | chr2:121974103-122042778  | 4,572   | 13,010  | -1,51 | CRC < NCT | 0,00035  | 0,0094833 |
| XLOC_002<br>322 | ARHGAP30,TSTD1,USF1 | chr1:161007411-161039790  | 130,815 | 372,590 | -1,51 | CRC < NCT | 0,001    | 0,0199726 |
| XLOC_019<br>847 | ABCG1               | chr21:43619798-43724500   | 9,928   | 28,290  | -1,51 | CRC < NCT | 0,00015  | 0,0050841 |
| XLOC_013<br>653 | OSBPL7              | chr17:45884628-45899199   | 5,006   | 14,271  | -1,51 | CRC < NCT | 0,00015  | 0,0050841 |
| XLOC_001<br>539 | NBPF1               | chr1:16854837-16996604    | 8,684   | 24,760  | -1,51 | CRC < NCT | 0,00075  | 0,0164378 |
| XLOC_032<br>532 | HDHD3               | chr9:116134439-116142479  | 46,817  | 133,513 | -1,51 | CRC < NCT | 5,00E-05 | 0,0020443 |
| XLOC_006<br>686 | PRR13               | chr12:53835375-53841906   | 162,105 | 462,592 | -1,51 | CRC < NCT | 0,0001   | 0,003647  |
| XLOC_024<br>844 | CMBL                | chr5:10274832-10308925    | 20,472  | 58,504  | -1,51 | CRC < NCT | 0,00025  | 0,0074979 |
| XLOC_020<br>002 | RCAN1               | chr21:35888739-35987441   | 24,023  | 68,717  | -1,52 | CRC < NCT | 0,0001   | 0,003647  |
| XLOC_003<br>261 | CAMK1D              | chr10:12391505-12877545   | 3,833   | 11,001  | -1,52 | CRC < NCT | 0,00175  | 0,0294656 |
| XLOC_026<br>090 | PAQR8               | chr6:52226547-52281378    | 17,006  | 48,816  | -1,52 | CRC < NCT | 5,00E-05 | 0,0020443 |
| XLOC_010<br>902 | ULK3                | chr15:75128456-75135552   | 10,462  | 30,055  | -1,52 | CRC < NCT | 5,00E-05 | 0,0020443 |
| XLOC_026<br>359 | PPP1R14C            | chr6:150464187-150571530  | 9,824   | 28,233  | -1,52 | CRC < NCT | 0,00065  | 0,0147056 |
| XLOC_015<br>832 | NR2F6               | chr19:17342634-17356714   | 44,531  | 128,045 | -1,52 | CRC < NCT | 5,00E-05 | 0,0020443 |
| XLOC_015<br>360 | MYH14               | chr19:50691218-50814033   | 46,589  | 133,974 | -1,52 | CRC < NCT | 0,0003   | 0,0084946 |
| XLOC_017<br>338 | ZFAND2B             | chr2:220071505-220074373  | 31,389  | 90,285  | -1,52 | CRC < NCT | 5,00E-05 | 0,0020443 |
| XLOC_014<br>263 | RIOK3               | chr18:21032786-21063107   | 19,411  | 55,934  | -1,53 | CRC < NCT | 5,00E-05 | 0,0020443 |
| XLOC_029<br>790 | MOGAT3,NAT16        | chr7:100812737-100844439  | 8,227   | 23,716  | -1,53 | CRC < NCT | 0,0037   | 0,0490331 |
| XLOC_009<br>551 | EGLN3               | chr14:34393420-34420284   | 22,910  | 66,296  | -1,53 | CRC < NCT | 0,0001   | 0,003647  |
| XLOC_016<br>291 | CDC42EP5            | chr19:54976208-54984437   | 92,479  | 268,062 | -1,54 | CRC < NCT | 5,00E-05 | 0,0020443 |
| XLOC_005<br>819 | BAD                 | chr11:64037299-64056972   | 46,793  | 135,660 | -1,54 | CRC < NCT | 0,0004   | 0,01042   |
| XLOC_002<br>547 | PLXNA2              | chr1:208195581-208417665  | 3,020   | 8,799   | -1,54 | CRC < NCT | 5,00E-05 | 0,0020443 |
| XLOC_014<br>779 | GNA11               | chr19:3094407-3124388     | 23,894  | 69,340  | -1,54 | CRC < NCT | 5,00E-05 | 0,0020443 |
| XLOC_023<br>020 | PARM1               | chr4:75858284-75975604    | 33,392  | 97,009  | -1,54 | CRC < NCT | 0,00025  | 0,0074979 |
| XLOC_011<br>222 | FAM195A             | chr16:691547-699253       | 53,244  | 155,317 | -1,54 | CRC < NCT | 0,0002   | 0,006387  |
| XLOC_020<br>335 | TCN2                | chr22:31003069-31023047   | 13,734  | 40,147  | -1,55 | CRC < NCT | 0,00015  | 0,0050841 |
| XLOC_006<br>121 | AMICA1              | chr11:118064441-118095820 | 9,469   | 27,712  | -1,55 | CRC < NCT | 0,00055  | 0,0131101 |
| XLOC_015<br>634 | MAP2K2              | chr19:4087695-4124214     | 98,529  | 288,547 | -1,55 | CRC < NCT | 5,00E-05 | 0,0020443 |
| XLOC_014<br>982 | OCEL1               | chr19:17336787-17340029   | 16,609  | 48,670  | -1,55 | CRC < NCT | 0,0012   | 0,0226522 |
| XLOC_023<br>451 | RBM47               | chr4:40421402-40632918    | 24,799  | 72,774  | -1,55 | CRC < NCT | 5,00E-05 | 0,0020443 |
| XLOC_012<br>031 | YPEL3               | chr16:30103633-30107580   | 30,048  | 88,177  | -1,55 | CRC < NCT | 0,00015  | 0,0050841 |
| XLOC_007<br>344 | VDR                 | chr12:48234192-48298849   | 14,981  | 44,102  | -1,56 | CRC < NCT | 5,00E-05 | 0,0020443 |
| XLOC_033<br>823 | IL2RG               | chrX:70327251-70331922    | 55,679  | 164,254 | -1,56 | CRC < NCT | 5,00E-05 | 0,0020443 |
| XLOC_003<br>792 | PRAP1               | chr10:135156637-135168377 | 197,638 | 583,114 | -1,56 | CRC < NCT | 0,00305  | 0,0429805 |
| XLOC_024<br>716 | NEURL1B             | chr5:172068260-172118542  | 8,353   | 24,705  | -1,56 | CRC < NCT | 5,00E-05 | 0,0020443 |
| XLOC_018<br>185 | SATB2               | chr2:200133645-200342223  | 9,693   | 28,684  | -1,57 | CRC < NCT | 0,0012   | 0,0226522 |

|                 |          |                          |         |         |       |           |          |           |
|-----------------|----------|--------------------------|---------|---------|-------|-----------|----------|-----------|
| XLOC_024<br>641 | SYNPO    | chr5:149965445-150038935 | 13,046  | 38,682  | -1,57 | CRC < NCT | 0,00115  | 0,0220507 |
| XLOC_003<br>550 | PAPSS2   | chr10:89419475-89507462  | 30,343  | 90,195  | -1,57 | CRC < NCT | 5,00E-05 | 0,0020443 |
| XLOC_019<br>572 | CTSZ     | chr20:57556262-57582309  | 161,492 | 480,450 | -1,57 | CRC < NCT | 0,00035  | 0,0094833 |
| XLOC_022<br>415 | BDH1     | chr3:197232149-197300194 | 18,402  | 54,764  | -1,57 | CRC < NCT | 0,0001   | 0,003647  |
| XLOC_027<br>131 | MPC1     | chr6:166778400-166796502 | 34,692  | 103,456 | -1,58 | CRC < NCT | 5,00E-05 | 0,0020443 |
| XLOC_000<br>512 | PGM1     | chr1:64058946-64125916   | 25,592  | 76,732  | -1,58 | CRC < NCT | 5,00E-05 | 0,0020443 |
| XLOC_010<br>692 | BMF      | chr15:40380088-40401094  | 3,259   | 9,776   | -1,58 | CRC < NCT | 0,00025  | 0,0074979 |
| XLOC_032<br>030 | FAM73B   | chr9:131798821-131834363 | 8,006   | 24,015  | -1,58 | CRC < NCT | 5,00E-05 | 0,0020443 |
| XLOC_001<br>641 | SLC9A1   | chr1:27425299-27481888   | 14,529  | 43,659  | -1,59 | CRC < NCT | 5,00E-05 | 0,0020443 |
| XLOC_025<br>117 | TRIM36   | chr5:114460276-114516243 | 2,138   | 6,426   | -1,59 | CRC < NCT | 0,0034   | 0,0463025 |
| XLOC_006<br>417 | B4GALNT3 | chr12:569184-672933      | 9,273   | 27,899  | -1,59 | CRC < NCT | 5,00E-05 | 0,0020443 |
| XLOC_011<br>874 | ADCY9    | chr16:4012463-4166186    | 2,417   | 7,276   | -1,59 | CRC < NCT | 0,00035  | 0,0094833 |
| XLOC_007<br>203 | KLRB1    | chr12:9747869-9760497    | 14,808  | 44,628  | -1,59 | CRC < NCT | 0,00265  | 0,0390961 |
| XLOC_023<br>244 | ETFDH    | chr4:159587826-159644847 | 13,682  | 41,465  | -1,60 | CRC < NCT | 0,0038   | 0,049887  |
| XLOC_002<br>236 | MUC1     | chr1:155158298-155164440 | 72,939  | 221,218 | -1,60 | CRC < NCT | 0,00065  | 0,0147056 |
| XLOC_000<br>953 | SLAMF7   | chr1:160708846-160725076 | 6,013   | 18,283  | -1,60 | CRC < NCT | 0,00025  | 0,0074979 |
| XLOC_029<br>408 | ZFAND2A  | chr7:1187702-1214905     | 31,639  | 96,229  | -1,60 | CRC < NCT | 0,00015  | 0,0050841 |
| XLOC_001<br>600 | TCEA3    | chr1:23704700-23751651   | 33,043  | 100,584 | -1,61 | CRC < NCT | 0,0005   | 0,0123209 |
| XLOC_021<br>646 | FAM43A   | chr3:194406172-194410449 | 3,429   | 10,445  | -1,61 | CRC < NCT | 0,0006   | 0,0139198 |
| XLOC_025<br>158 | IRF1     | chr5:131817299-131828016 | 23,016  | 70,126  | -1,61 | CRC < NCT | 5,00E-05 | 0,0020443 |
| XLOC_000<br>470 | CPT2     | chr1:53662100-53686601   | 14,264  | 43,463  | -1,61 | CRC < NCT | 0,0004   | 0,010142  |
| XLOC_016<br>019 | SERTAD1  | chr19:40927532-40931932  | 22,286  | 68,122  | -1,61 | CRC < NCT | 0,0001   | 0,003647  |
| XLOC_021<br>341 | FAM162A  | chr3:122078351-122233831 | 137,290 | 419,805 | -1,61 | CRC < NCT | 0,00075  | 0,0164378 |
| XLOC_017<br>916 | MALL     | chr2:110841446-110874143 | 3,758   | 11,517  | -1,62 | CRC < NCT | 0,0008   | 0,0171221 |
| XLOC_001<br>632 | AIM1L    | chr1:26648349-26685400   | 2,789   | 8,558   | -1,62 | CRC < NCT | 0,00015  | 0,0050841 |
| XLOC_004<br>174 | AVPI1    | chr10:99437174-99447570  | 25,255  | 77,625  | -1,62 | CRC < NCT | 5,00E-05 | 0,0020443 |
| XLOC_020<br>382 | SH3BP1   | chr22:38035450-38054384  | 15,844  | 48,893  | -1,63 | CRC < NCT | 5,00E-05 | 0,0020443 |
| XLOC_013<br>433 | MYO1D    | chr17:30819452-31233604  | 41,289  | 127,584 | -1,63 | CRC < NCT | 5,00E-05 | 0,0020443 |
| XLOC_013<br>219 | ZZEF1    | chr17:3907496-4060999    | 5,920   | 18,362  | -1,63 | CRC < NCT | 5,00E-05 | 0,0020443 |
| XLOC_005<br>164 | CAPN5    | chr11:76777991-76837211  | 28,024  | 86,933  | -1,63 | CRC < NCT | 5,00E-05 | 0,0020443 |
| XLOC_030<br>401 | NAT2     | chr8:18248754-18258729   | 8,327   | 25,849  | -1,63 | CRC < NCT | 0,0019   | 0,0313827 |
| XLOC_011<br>710 | OSGIN1   | chr16:83986800-83999940  | 3,981   | 12,370  | -1,64 | CRC < NCT | 0,00105  | 0,0206545 |
| XLOC_010<br>434 | MPI      | chr15:75182047-75199462  | 9,218   | 28,676  | -1,64 | CRC < NCT | 0,00135  | 0,0246666 |
| XLOC_025<br>370 | CLTB     | chr5:175818581-175843639 | 141,989 | 442,126 | -1,64 | CRC < NCT | 5,00E-05 | 0,0020443 |
| XLOC_021<br>304 | GRAMD1C  | chr3:113557680-113666368 | 2,185   | 6,812   | -1,64 | CRC < NCT | 0,0012   | 0,0226522 |
| XLOC_026<br>744 | KCNK5    | chr6:39151691-39197572   | 9,166   | 28,589  | -1,64 | CRC < NCT | 5,00E-05 | 0,0020443 |
| XLOC_001<br>974 | BCAR3    | chr1:94027297-94315109   | 8,805   | 27,545  | -1,65 | CRC < NCT | 0,00085  | 0,0178569 |
| XLOC_003<br>589 | SLC35G1  | chr10:95653696-95714457  | 3,631   | 11,364  | -1,65 | CRC < NCT | 0,0006   | 0,0139198 |

|                 |                                                                 |                           |        |         |       |           |          |           |
|-----------------|-----------------------------------------------------------------|---------------------------|--------|---------|-------|-----------|----------|-----------|
| XLOC_000<br>883 | ZBTB7B                                                          | chr1:154975105-155006257  | 19,135 | 60,012  | -1,65 | CRC < NCT | 5,00E-05 | 0,0020443 |
| XLOC_005<br>911 | CPT1A                                                           | chr11:68522087-68609399   | 19,937 | 62,530  | -1,65 | CRC < NCT | 5,00E-05 | 0,0020443 |
| XLOC_005<br>323 | OAF                                                             | chr11:120081403-120102085 | 38,622 | 121,388 | -1,65 | CRC < NCT | 5,00E-05 | 0,0020443 |
| XLOC_005<br>252 | ACAT1                                                           | chr11:107992249-108019481 | 51,643 | 162,464 | -1,65 | CRC < NCT | 5,00E-05 | 0,0020443 |
| XLOC_005<br>999 | CCDC89,SYTL2                                                    | chr11:85394886-85522203   | 16,221 | 51,156  | -1,66 | CRC < NCT | 5,00E-05 | 0,0020443 |
| XLOC_029<br>716 | SAMD9                                                           | chr7:92727481-92747349    | 4,626  | 14,606  | -1,66 | CRC < NCT | 5,00E-05 | 0,0020443 |
| XLOC_022<br>894 | C4orf19                                                         | chr4:37455425-37687999    | 8,771  | 27,745  | -1,66 | CRC < NCT | 0,0005   | 0,0123209 |
| XLOC_007<br>952 | -                                                               | chr12:53535755-53536289   | 11,166 | 35,368  | -1,66 | CRC < NCT | 0,00275  | 0,0400849 |
| XLOC_001<br>293 | RHOA                                                            | chr1:228780393-228882417  | 9,123  | 28,985  | -1,67 | CRC < NCT | 5,00E-05 | 0,0020443 |
| XLOC_005<br>916 | -                                                               | chr11:69290371-69294855   | 4,020  | 12,778  | -1,67 | CRC < NCT | 0,0021   | 0,0336498 |
| XLOC_026<br>639 | HLA-B                                                           | chr6:31321648-31325028    | 19,258 | 61,260  | -1,67 | CRC < NCT | 0,00095  | 0,0192909 |
| XLOC_019<br>498 | ACOT8                                                           | chr20:44451854-44507769   | 27,399 | 87,196  | -1,67 | CRC < NCT | 0,0008   | 0,0171221 |
| XLOC_022<br>365 | P3H2                                                            | chr3:189674508-189862635  | 5,615  | 17,871  | -1,67 | CRC < NCT | 0,00045  | 0,0114127 |
| XLOC_001<br>123 | NR5A2                                                           | chr1:199996713-200146723  | 4,235  | 13,546  | -1,68 | CRC < NCT | 5,00E-05 | 0,0020443 |
| XLOC_020<br>810 | ARSA                                                            | chr22:51061181-51066601   | 9,355  | 30,147  | -1,69 | CRC < NCT | 5,00E-05 | 0,0020443 |
| XLOC_020<br>403 | APOBEC3A,APOBEC3A_B,A<br>POBEC3B,APOBEC3C,APOB<br>EC3F,APOBEC3G | chr22:39348619-39483748   | 21,936 | 70,694  | -1,69 | CRC < NCT | 5,00E-05 | 0,0020443 |
| XLOC_011<br>720 | KIAA0513                                                        | chr16:85061356-85127835   | 2,037  | 6,578   | -1,69 | CRC < NCT | 0,0014   | 0,0253013 |
| XLOC_010<br>578 | ARRDC4                                                          | chr15:98503920-98517072   | 8,215  | 26,532  | -1,69 | CRC < NCT | 5,00E-05 | 0,0020443 |
| XLOC_013<br>453 | CCL5                                                            | chr17:34198495-34207377   | 21,957 | 70,953  | -1,69 | CRC < NCT | 0,00025  | 0,0074979 |
| XLOC_025<br>126 | SEMA6A                                                          | chr5:115735251-115910622  | 3,586  | 11,588  | -1,69 | CRC < NCT | 0,001    | 0,0199726 |
| XLOC_031<br>125 | PAG1                                                            | chr8:81880042-82024344    | 2,201  | 7,115   | -1,69 | CRC < NCT | 5,00E-05 | 0,0020443 |
| XLOC_029<br>119 | AGFG2                                                           | chr7:100136795-100165955  | 6,722  | 21,731  | -1,69 | CRC < NCT | 5,00E-05 | 0,0020443 |
| XLOC_033<br>152 | MAOA                                                            | chrX:43514154-43606071    | 25,631 | 83,136  | -1,70 | CRC < NCT | 5,00E-05 | 0,0020443 |
| XLOC_003<br>695 | CASP7                                                           | chr10:115438920-115491429 | 36,705 | 119,079 | -1,70 | CRC < NCT | 5,00E-05 | 0,0020443 |
| XLOC_022<br>006 | STX19                                                           | chr3:93698237-93774522    | 13,008 | 42,225  | -1,70 | CRC < NCT | 0,00235  | 0,0361928 |
| XLOC_020<br>997 | GPD1L                                                           | chr3:32148002-32210272    | 14,167 | 46,037  | -1,70 | CRC < NCT | 5,00E-05 | 0,0020443 |
| XLOC_004<br>298 | FGFR2                                                           | chr10:123237843-123357972 | 5,703  | 18,555  | -1,70 | CRC < NCT | 0,0003   | 0,0084946 |
| XLOC_012<br>618 | SPECC1                                                          | chr17:19912648-20223063   | 6,094  | 19,830  | -1,70 | CRC < NCT | 5,00E-05 | 0,0020443 |
| XLOC_021<br>487 | P2RY1                                                           | chr3:152552527-152559405  | 1,408  | 4,585   | -1,70 | CRC < NCT | 0,0009   | 0,0185023 |
| XLOC_004<br>065 | C10orf54                                                        | chr10:73156690-73575729   | 12,724 | 41,486  | -1,71 | CRC < NCT | 5,00E-05 | 0,0020443 |
| XLOC_001<br>575 | CAMK2N1                                                         | chr1:20808883-20812728    | 50,313 | 164,059 | -1,71 | CRC < NCT | 5,00E-05 | 0,0020443 |
| XLOC_011<br>776 | SPIRE2                                                          | chr16:89894906-89937855   | 11,510 | 37,586  | -1,71 | CRC < NCT | 5,00E-05 | 0,0020443 |
| XLOC_000<br>887 | EFNA1                                                           | chr1:155100348-155107386  | 58,633 | 191,976 | -1,71 | CRC < NCT | 5,00E-05 | 0,0020443 |
| XLOC_021<br>449 | ATP1B3                                                          | chr3:141595469-141645382  | 95,598 | 313,833 | -1,71 | CRC < NCT | 5,00E-05 | 0,0020443 |
| XLOC_012<br>223 | CFDP1                                                           | chr16:75327607-75467387   | 67,297 | 221,282 | -1,72 | CRC < NCT | 5,00E-05 | 0,0020443 |
| XLOC_004<br>632 | SLC22A18                                                        | chr11:2907517-2946653     | 37,568 | 123,615 | -1,72 | CRC < NCT | 0,0001   | 0,003647  |
| XLOC_009<br>526 | RIPK3                                                           | chr14:24805226-24809242   | 12,521 | 41,222  | -1,72 | CRC < NCT | 5,00E-05 | 0,0020443 |

|                 |                    |                           |         |         |       |           |          |           |
|-----------------|--------------------|---------------------------|---------|---------|-------|-----------|----------|-----------|
| XLOC_017<br>800 | RETSAT             | chr2:85567685-85581821    | 41,376  | 136,253 | -1,72 | CRC < NCT | 5,00E-05 | 0,0020443 |
| XLOC_024<br>858 | FAM134B            | chr5:16471694-16630078    | 12,695  | 41,833  | -1,72 | CRC < NCT | 0,0001   | 0,003647  |
| XLOC_021<br>867 | SLC25A20           | chr3:48894355-48936426    | 16,272  | 54,153  | -1,73 | CRC < NCT | 5,00E-05 | 0,0020443 |
| XLOC_005<br>313 | C2CD2L             | chr11:118977678-118989250 | 5,496   | 18,306  | -1,74 | CRC < NCT | 5,00E-05 | 0,0020443 |
| XLOC_022<br>339 | LIPH               | chr3:185223903-185270574  | 14,999  | 50,128  | -1,74 | CRC < NCT | 5,00E-05 | 0,0020443 |
| XLOC_013<br>261 | YBX2               | chr17:7185025-7197930     | 5,854   | 19,661  | -1,75 | CRC < NCT | 0,0034   | 0,0463025 |
| XLOC_012<br>206 | ZNF821             | chr16:71893579-71919302   | 3,018   | 10,138  | -1,75 | CRC < NCT | 0,00115  | 0,0220507 |
| XLOC_020<br>587 | CHCHD10            | chr22:24105207-24110199   | 149,542 | 503,024 | -1,75 | CRC < NCT | 5,00E-05 | 0,0020443 |
| XLOC_021<br>760 | THRB               | chr3:24156882-24541502    | 0,877   | 2,954   | -1,75 | CRC < NCT | 0,00315  | 0,0437473 |
| XLOC_006<br>575 | PPFIBP1,REP15      | chr12:27677044-27855806   | 20,164  | 68,060  | -1,76 | CRC < NCT | 0,00115  | 0,0220507 |
| XLOC_010<br>764 | SPPL2A             | chr15:50994460-51058999   | 20,897  | 70,606  | -1,76 | CRC < NCT | 5,00E-05 | 0,0020443 |
| XLOC_014<br>561 | CCDC68             | chr18:52568131-52626739   | 5,387   | 18,219  | -1,76 | CRC < NCT | 5,00E-05 | 0,0020443 |
| XLOC_022<br>131 | MGLL               | chr3:127407776-127542233  | 39,134  | 132,481 | -1,76 | CRC < NCT | 5,00E-05 | 0,0020443 |
| XLOC_002<br>709 | CHML,OPN3          | chr1:241695433-241803701  | 9,655   | 32,744  | -1,76 | CRC < NCT | 5,00E-05 | 0,0020443 |
| XLOC_019<br>102 | CTSA,ZSWIM1        | chr20:44509847-44541003   | 111,252 | 378,398 | -1,77 | CRC < NCT | 0,0007   | 0,0155855 |
| XLOC_000<br>025 | CPTP               | chr1:1260142-1264318      | 13,908  | 47,478  | -1,77 | CRC < NCT | 5,00E-05 | 0,0020443 |
| XLOC_024<br>443 | C5orf30            | chr5:102594441-102614404  | 9,228   | 31,525  | -1,77 | CRC < NCT | 5,00E-05 | 0,0020443 |
| XLOC_031<br>677 | PRSS3              | chr9:33750463-33799236    | 135,414 | 462,719 | -1,77 | CRC < NCT | 5,00E-05 | 0,0020443 |
| XLOC_017<br>386 | B3GNT7             | chr2:232260334-232265877  | 18,851  | 64,426  | -1,77 | CRC < NCT | 0,0003   | 0,0084946 |
| XLOC_005<br>387 | TMEM45B            | chr11:129685707-129765493 | 58,474  | 200,697 | -1,78 | CRC < NCT | 0,0003   | 0,0084946 |
| XLOC_019<br>010 | ZNF341             | chr20:32319565-32398905   | 2,021   | 6,941   | -1,78 | CRC < NCT | 0,0009   | 0,0185023 |
| XLOC_007<br>677 | GLTP               | chr12:110288745-110318293 | 16,706  | 57,410  | -1,78 | CRC < NCT | 5,00E-05 | 0,0020443 |
| XLOC_010<br>526 | ISG20              | chr15:89178867-89199646   | 18,037  | 62,143  | -1,78 | CRC < NCT | 0,0001   | 0,003647  |
| XLOC_015<br>798 | GIPC1              | chr19:14588540-14607252   | 95,341  | 329,597 | -1,79 | CRC < NCT | 5,00E-05 | 0,0020443 |
| XLOC_021<br>959 | FAM3D              | chr3:58619661-58693628    | 246,846 | 855,124 | -1,79 | CRC < NCT | 5,00E-05 | 0,0020443 |
| XLOC_026<br>304 | TCF21              | chr6:133562494-134216937  | 4,739   | 16,440  | -1,79 | CRC < NCT | 0,00275  | 0,0400849 |
| XLOC_015<br>344 | FCGRT,RCN3         | chr19:50015535-50046890   | 110,391 | 386,113 | -1,81 | CRC < NCT | 5,00E-05 | 0,0020443 |
| XLOC_032<br>743 | PNPLA7             | chr9:140354010-140445083  | 1,379   | 4,827   | -1,81 | CRC < NCT | 0,00215  | 0,0341212 |
| XLOC_024<br>498 | GRAMD3             | chr5:125695787-125829987  | 8,959   | 31,411  | -1,81 | CRC < NCT | 5,00E-05 | 0,0020443 |
| XLOC_024<br>528 | SOWAHA             | chr5:132149015-132152489  | 3,430   | 12,030  | -1,81 | CRC < NCT | 0,00035  | 0,0094833 |
| XLOC_003<br>680 | MXI1               | chr10:111966934-112050062 | 14,757  | 51,795  | -1,81 | CRC < NCT | 5,00E-05 | 0,0020443 |
| XLOC_023<br>798 | DDX60,DDX60L       | chr4:169137408-169401665  | 15,174  | 53,385  | -1,81 | CRC < NCT | 0,0001   | 0,003647  |
| XLOC_013<br>630 | PLCD3              | chr17:43189005-43209900   | 29,338  | 103,432 | -1,82 | CRC < NCT | 5,00E-05 | 0,0020443 |
| XLOC_020<br>360 | ISX                | chr22:35461926-35489158   | 8,233   | 29,033  | -1,82 | CRC < NCT | 0,00045  | 0,0114127 |
| XLOC_020<br>693 | PDXP               | chr22:38054600-38062939   | 9,786   | 34,578  | -1,82 | CRC < NCT | 0,00055  | 0,0131101 |
| XLOC_025<br>818 | HIST1H1E,HIST1H2BD | chr6:26156509-26203032    | 25,477  | 90,038  | -1,82 | CRC < NCT | 0,00225  | 0,0351876 |
| XLOC_007<br>217 | STYK1              | chr12:10766264-10826891   | 4,854   | 17,189  | -1,82 | CRC < NCT | 0,0001   | 0,003647  |
| XLOC_026<br>103 | TINAG              | chr6:54172563-54254950    | 7,315   | 25,975  | -1,83 | CRC < NCT | 0,0005   | 0,0123209 |

|                 |               |                           |         |          |       |           |          |           |
|-----------------|---------------|---------------------------|---------|----------|-------|-----------|----------|-----------|
| XLOC_004<br>800 | PRR5L         | chr11:36317724-36503998   | 8,706   | 31,229   | -1,84 | CRC < NCT | 5,00E-05 | 0,0020443 |
| XLOC_021<br>816 | ANO10         | chr3:43396014-43663560    | 24,529  | 88,341   | -1,85 | CRC < NCT | 5,00E-05 | 0,0020443 |
| XLOC_007<br>543 | PTPRR         | chr12:71031846-71314584   | 8,519   | 30,812   | -1,85 | CRC < NCT | 0,0004   | 0,01042   |
| XLOC_012<br>032 | GDPD3,MAPK3   | chr16:30114753-30134630   | 88,274  | 320,247  | -1,86 | CRC < NCT | 5,00E-05 | 0,0020443 |
| XLOC_018<br>301 | PID1          | chr2:229888650-230136057  | 7,347   | 26,709   | -1,86 | CRC < NCT | 5,00E-05 | 0,0020443 |
| XLOC_006<br>655 | METTL7A       | chr12:51316449-51326844   | 14,579  | 53,008   | -1,86 | CRC < NCT | 0,0001   | 0,003647  |
| XLOC_015<br>147 | C19orf33      | chr19:38793886-38808502   | 339,404 | 1235,550 | -1,86 | CRC < NCT | 0,0004   | 0,01042   |
| XLOC_019<br>252 | FKBP1A,SDCBP2 | chr20:1290554-1374081     | 195,671 | 712,389  | -1,86 | CRC < NCT | 5,00E-05 | 0,0020443 |
| XLOC_013<br>185 | MIR22,MIR22HG | chr17:1614796-1641893     | 12,780  | 46,532   | -1,86 | CRC < NCT | 0,00315  | 0,0437473 |
| XLOC_016<br>827 | VAMP8         | chr2:85804613-85809156    | 176,122 | 641,417  | -1,86 | CRC < NCT | 5,00E-05 | 0,0020443 |
| XLOC_003<br>686 | ADRA2A        | chr10:112836653-112840733 | 5,568   | 20,320   | -1,87 | CRC < NCT | 0,00065  | 0,0147056 |
| XLOC_010<br>824 | DAPK2         | chr15:64199232-64338552   | 6,488   | 23,716   | -1,87 | CRC < NCT | 5,00E-05 | 0,0020443 |
| XLOC_029<br>681 | FGL2          | chr7:76589113-76924684    | 8,477   | 30,997   | -1,87 | CRC < NCT | 0,00075  | 0,0164378 |
| XLOC_030<br>724 | FER1L6        | chr8:124864226-125183763  | 1,170   | 4,278    | -1,87 | CRC < NCT | 0,0001   | 0,003647  |
| XLOC_001<br>730 | EPHA10        | chr1:38179259-38230824    | 2,453   | 8,990    | -1,87 | CRC < NCT | 5,00E-05 | 0,0020443 |
| XLOC_000<br>820 | CGN           | chr1:151483861-151511170  | 18,414  | 67,626   | -1,88 | CRC < NCT | 5,00E-05 | 0,0020443 |
| XLOC_003<br>531 | CDHR1         | chr10:85954322-85985345   | 2,544   | 9,358    | -1,88 | CRC < NCT | 0,0015   | 0,0267114 |
| XLOC_010<br>343 | GCNT3         | chr15:59848172-59982273   | 95,605  | 352,509  | -1,88 | CRC < NCT | 0,0018   | 0,0301682 |
| XLOC_030<br>838 | DEFB1         | chr8:6728096-6735529      | 42,211  | 155,842  | -1,88 | CRC < NCT | 0,00175  | 0,0294656 |
| XLOC_012<br>226 | CHST5,TMEM231 | chr16:75531846-75590933   | 9,366   | 34,615   | -1,89 | CRC < NCT | 5,00E-05 | 0,0020443 |
| XLOC_015<br>333 | TRPM4         | chr19:49661015-49715163   | 25,174  | 93,153   | -1,89 | CRC < NCT | 5,00E-05 | 0,0020443 |
| XLOC_023<br>345 | ZFYVE28       | chr4:2269461-2420429      | 3,394   | 12,566   | -1,89 | CRC < NCT | 0,0002   | 0,006387  |
| XLOC_012<br>640 | LGALS9        | chr17:25958173-25976586   | 49,792  | 184,654  | -1,89 | CRC < NCT | 5,00E-05 | 0,0020443 |
| XLOC_029<br>784 | ACHE          | chr7:100487414-100493754  | 4,432   | 16,467   | -1,89 | CRC < NCT | 0,00065  | 0,0147056 |
| XLOC_024<br>648 | SLC36A1       | chr5:150816552-150876994  | 2,692   | 10,009   | -1,89 | CRC < NCT | 5,00E-05 | 0,0020443 |
| XLOC_028<br>849 | PRR15         | chr7:29019582-29609367    | 48,251  | 179,948  | -1,90 | CRC < NCT | 0,0012   | 0,0226522 |
| XLOC_005<br>220 | ENDOD1        | chr11:94822973-94870460   | 10,048  | 37,481   | -1,90 | CRC < NCT | 5,00E-05 | 0,0020443 |
| XLOC_010<br>246 | CHP1          | chr15:41523436-41574090   | 46,157  | 172,420  | -1,90 | CRC < NCT | 5,00E-05 | 0,0020443 |
| XLOC_013<br>159 | METRNL        | chr17:81037563-81057934   | 28,163  | 105,216  | -1,90 | CRC < NCT | 5,00E-05 | 0,0020443 |
| XLOC_015<br>848 | LOC729966     | chr19:18360759-18366404   | 19,493  | 73,223   | -1,91 | CRC < NCT | 0,00115  | 0,0220507 |
| XLOC_005<br>386 | BARX2         | chr11:129169582-129322317 | 5,933   | 22,311   | -1,91 | CRC < NCT | 0,0012   | 0,0226522 |
| XLOC_000<br>876 | IL6R          | chr1:154375918-154520624  | 3,049   | 11,525   | -1,92 | CRC < NCT | 0,0006   | 0,0139198 |
| XLOC_011<br>918 | LITAF         | chr16:11640030-11681322   | 60,393  | 228,835  | -1,92 | CRC < NCT | 5,00E-05 | 0,0020443 |
| XLOC_006<br>090 | IL18          | chr11:112013913-112035147 | 29,672  | 112,496  | -1,92 | CRC < NCT | 5,00E-05 | 0,0020443 |
| XLOC_015<br>668 | SLC25A23      | chr19:6440074-6459809     | 19,492  | 73,947   | -1,92 | CRC < NCT | 5,00E-05 | 0,0020443 |
| XLOC_020<br>342 | INPP5J        | chr22:31518560-31536593   | 3,605   | 13,678   | -1,92 | CRC < NCT | 0,001    | 0,0199726 |
| XLOC_007<br>481 | MYO1A,TAC3    | chr12:57403780-57444985   | 21,710  | 82,419   | -1,92 | CRC < NCT | 0,0005   | 0,0123209 |
| XLOC_003<br>590 | PLCE1         | chr10:95753695-96122735   | 3,192   | 12,148   | -1,93 | CRC < NCT | 0,0002   | 0,006387  |



|                 |                               |                           |         |          |       |           |          |           |
|-----------------|-------------------------------|---------------------------|---------|----------|-------|-----------|----------|-----------|
| XLOC_021<br>016 | VILL                          | chr3:38029429-38178733    | 25,610  | 97,565   | -1,93 | CRC < NCT | 0,0038   | 0,049887  |
| XLOC_007<br>247 | LINC01559                     | chr12:13523301-13540128   | 17,664  | 67,571   | -1,94 | CRC < NCT | 5,00E-05 | 0,0020443 |
| XLOC_014<br>883 | ATG4D                         | chr19:10654411-10676727   | 11,072  | 42,437   | -1,94 | CRC < NCT | 0,0001   | 0,003647  |
| XLOC_026<br>073 | MEP1A                         | chr6:46761066-46817343    | 67,569  | 259,316  | -1,94 | CRC < NCT | 0,00045  | 0,0114127 |
| XLOC_022<br>166 | C3orf36,SLCO2A1               | chr3:133646649-133757888  | 7,413   | 28,449   | -1,94 | CRC < NCT | 0,0001   | 0,003647  |
| XLOC_000<br>194 | CDA                           | chr1:20915417-20945406    | 28,367  | 109,163  | -1,94 | CRC < NCT | 5,00E-05 | 0,0020443 |
| XLOC_020<br>737 | PMM1                          | chr22:41972889-41990936   | 23,039  | 88,764   | -1,95 | CRC < NCT | 5,00E-05 | 0,0020443 |
| XLOC_030<br>812 | GPT,MFSD3                     | chr8:145728352-145743225  | 29,274  | 112,920  | -1,95 | CRC < NCT | 0,0001   | 0,003647  |
| XLOC_032<br>731 | TPRN                          | chr9:140086006-140095809  | 22,632  | 87,422   | -1,95 | CRC < NCT | 5,00E-05 | 0,0020443 |
| XLOC_013<br>182 | RILP,SCARF1                   | chr17:1536940-1553540     | 10,947  | 42,381   | -1,95 | CRC < NCT | 5,00E-05 | 0,0020443 |
| XLOC_000<br>290 | SERINC2                       | chr1:31882411-31907660    | 93,710  | 364,058  | -1,96 | CRC < NCT | 5,00E-05 | 0,0020443 |
| XLOC_017<br>776 | HK2                           | chr2:75059668-75123333    | 29,815  | 116,107  | -1,96 | CRC < NCT | 0,00125  | 0,0233782 |
| XLOC_002<br>050 | RHOC                          | chr1:113216933-113250025  | 264,422 | 1030,610 | -1,96 | CRC < NCT | 5,00E-05 | 0,0020443 |
| XLOC_016<br>918 | IL1R2                         | chr2:102608273-102658359  | 11,607  | 45,635   | -1,98 | CRC < NCT | 5,00E-05 | 0,0020443 |
| XLOC_000<br>633 | CDC14A                        | chr1:100817819-100986123  | 1,459   | 5,741    | -1,98 | CRC < NCT | 0,00025  | 0,0074979 |
| XLOC_011<br>661 | MARVELD3                      | chr16:71659875-71676061   | 15,006  | 59,063   | -1,98 | CRC < NCT | 5,00E-05 | 0,0020443 |
| XLOC_000<br>314 | AZIN2                         | chr1:33546713-33586157    | 1,814   | 7,140    | -1,98 | CRC < NCT | 0,0015   | 0,0267114 |
| XLOC_024<br>619 | SPINK5                        | chr5:147443534-147518996  | 2,585   | 10,189   | -1,98 | CRC < NCT | 0,00055  | 0,0131101 |
| XLOC_026<br>732 | CPNE5                         | chr6:36708546-36807382    | 2,246   | 8,867    | -1,98 | CRC < NCT | 0,0014   | 0,0253013 |
| XLOC_006<br>453 | PLEKHG6                       | chr12:6419601-6451895     | 17,793  | 70,231   | -1,98 | CRC < NCT | 0,0022   | 0,0346434 |
| XLOC_015<br>638 | STAP2                         | chr19:4324037-4400565     | 61,768  | 244,504  | -1,98 | CRC < NCT | 0,00165  | 0,0284652 |
| XLOC_016<br>596 | MAPRE3                        | chr2:27193238-27250087    | 6,474   | 25,651   | -1,99 | CRC < NCT | 5,00E-05 | 0,0020443 |
| XLOC_021<br>278 | FLJ22763                      | chr3:108844991-108870972  | 3,576   | 14,207   | -1,99 | CRC < NCT | 0,0006   | 0,0139198 |
| XLOC_006<br>663 | ACVRL1                        | chr12:52300716-52317210   | 12,882  | 51,426   | -2,00 | CRC < NCT | 5,00E-05 | 0,0020443 |
| XLOC_012<br>764 | RAPGEFL1                      | chr17:38333262-38352120   | 14,359  | 57,371   | -2,00 | CRC < NCT | 5,00E-05 | 0,0020443 |
| XLOC_032<br>611 | AK1,ST6GALNAC4,ST6GALN<br>AC6 | chr9:130625997-130679336  | 63,953  | 256,108  | -2,00 | CRC < NCT | 5,00E-05 | 0,0020443 |
| XLOC_007<br>023 | P2RX4                         | chr12:121647663-121672051 | 21,499  | 86,169   | -2,00 | CRC < NCT | 5,00E-05 | 0,0020443 |
| XLOC_013<br>048 | SLC9A3R1                      | chr17:72744750-72765499   | 60,961  | 245,396  | -2,01 | CRC < NCT | 5,00E-05 | 0,0020443 |
| XLOC_013<br>184 | TLCD2                         | chr17:1606083-1613917     | 2,898   | 11,679   | -2,01 | CRC < NCT | 5,00E-05 | 0,0020443 |
| XLOC_020<br>275 | IGLL5                         | chr22:23229959-23238293   | 247,882 | 998,938  | -2,01 | CRC < NCT | 5,00E-05 | 0,0020443 |
| XLOC_003<br>221 | -                             | chr10:3848936-3856828     | 0,628   | 2,535    | -2,01 | CRC < NCT | 0,00365  | 0,0486178 |
| XLOC_014<br>961 | CYP4F12,CYP4F3,CYP4F8         | chr19:15674468-15810097   | 11,954  | 48,542   | -2,02 | CRC < NCT | 5,00E-05 | 0,0020443 |
| XLOC_015<br>004 | JUND,MIR3188                  | chr19:18367905-18394826   | 44,550  | 181,271  | -2,02 | CRC < NCT | 0,00245  | 0,0372298 |
| XLOC_007<br>756 | RHOF                          | chr12:122150649-122231841 | 24,250  | 98,858   | -2,03 | CRC < NCT | 5,00E-05 | 0,0020443 |
| XLOC_001<br>795 | CCDC17                        | chr1:46085651-46089843    | 0,285   | 1,165    | -2,03 | CRC < NCT | 0,0017   | 0,0290257 |
| XLOC_013<br>487 | CACNB1                        | chr17:37329708-37353956   | 1,189   | 4,852    | -2,03 | CRC < NCT | 0,00105  | 0,0206545 |
| XLOC_020<br>961 | PLCL2                         | chr3:16926451-17132137    | 5,715   | 23,331   | -2,03 | CRC < NCT | 0,0001   | 0,003647  |
| XLOC_001<br>774 | C1orf210                      | chr1:43747556-43751288    | 17,295  | 70,839   | -2,03 | CRC < NCT | 5,00E-05 | 0,0020443 |

|                 |           |                           |         |         |       |           |          |           |
|-----------------|-----------|---------------------------|---------|---------|-------|-----------|----------|-----------|
| XLOC_018<br>905 | BMP2      | chr20:6748338-6764278     | 6,823   | 27,961  | -2,03 | CRC < NCT | 0,0001   | 0,003647  |
| XLOC_021<br>811 | HIGD1A    | chr3:42823936-42846027    | 51,224  | 210,403 | -2,04 | CRC < NCT | 5,00E-05 | 0,0020443 |
| XLOC_024<br>922 | CCL28     | chr5:43376747-43412512    | 14,552  | 60,463  | -2,05 | CRC < NCT | 5,00E-05 | 0,0020443 |
| XLOC_011<br>294 | IL32      | chr16:3115285-3131887     | 139,749 | 581,321 | -2,06 | CRC < NCT | 5,00E-05 | 0,0020443 |
| XLOC_007<br>748 | OASL      | chr12:121455564-121477045 | 13,341  | 56,334  | -2,08 | CRC < NCT | 5,00E-05 | 0,0020443 |
| XLOC_008<br>710 | -         | chr13:23269998-23270841   | 123,264 | 521,155 | -2,08 | CRC < NCT | 5,00E-05 | 0,0020443 |
| XLOC_003<br>684 | PDCD4     | chr10:112628646-112679133 | 35,602  | 150,544 | -2,08 | CRC < NCT | 5,00E-05 | 0,0020443 |
| XLOC_013<br>308 | LINC00675 | chr17:10575675-10721948   | 19,353  | 82,240  | -2,09 | CRC < NCT | 0,00145  | 0,0259223 |
| XLOC_008<br>559 | PCDH20    | chr13:61982714-61989655   | 0,710   | 3,023   | -2,09 | CRC < NCT | 0,00205  | 0,0331105 |
| XLOC_009<br>271 | BDKRB1    | chr14:96722450-96734946   | 2,444   | 10,410  | -2,09 | CRC < NCT | 0,00275  | 0,0400849 |
| XLOC_013<br>210 | TRPV3     | chr17:3413649-3461289     | 0,417   | 1,779   | -2,09 | CRC < NCT | 0,00335  | 0,0457925 |
| XLOC_028<br>924 | UPP1      | chr7:48127707-48148330    | 16,634  | 70,968  | -2,09 | CRC < NCT | 5,00E-05 | 0,0020443 |
| XLOC_013<br>866 | ACOX1     | chr17:73937456-74002162   | 12,520  | 52,207  | -2,09 | CRC < NCT | 5,00E-05 | 0,0020443 |
| XLOC_024<br>960 | MIER3     | chr5:56204944-56255288    | 6,052   | 25,943  | -2,10 | CRC < NCT | 5,00E-05 | 0,0020443 |
| XLOC_007<br>646 | APPL2     | chr12:105567073-105630008 | 18,756  | 80,452  | -2,10 | CRC < NCT | 5,00E-05 | 0,0020443 |
| XLOC_007<br>311 | CPNE8     | chr12:39046001-39303638   | 1,794   | 7,713   | -2,10 | CRC < NCT | 0,0003   | 0,0084946 |
| XLOC_014<br>800 | SHD       | chr19:4278597-4290721     | 8,554   | 36,839  | -2,11 | CRC < NCT | 0,0006   | 0,0139198 |
| XLOC_001<br>032 | PRDX6     | chr1:173152869-173457953  | 144,326 | 622,071 | -2,11 | CRC < NCT | 5,00E-05 | 0,0020443 |
| XLOC_014<br>468 | ABHD3     | chr18:19230855-19284766   | 18,568  | 80,076  | -2,11 | CRC < NCT | 5,00E-05 | 0,0020443 |
| XLOC_014<br>730 | MISP      | chr19:748420-764604       | 112,065 | 487,467 | -2,12 | CRC < NCT | 5,00E-05 | 0,0020443 |
| XLOC_008<br>175 | SMIM2-AS1 | chr13:44684533-44814657   | 4,170   | 18,243  | -2,13 | CRC < NCT | 0,00195  | 0,0320923 |
| XLOC_007<br>111 | PXMP2     | chr12:133264191-133287344 | 26,573  | 116,490 | -2,13 | CRC < NCT | 5,00E-05 | 0,0020443 |
| XLOC_016<br>967 | SLC20A1   | chr2:113399195-113422302  | 23,394  | 99,517  | -2,14 | CRC < NCT | 5,00E-05 | 0,0020443 |
| XLOC_023<br>057 | AGPAT9    | chr4:84456964-84527057    | 7,111   | 31,400  | -2,14 | CRC < NCT | 5,00E-05 | 0,0020443 |
| XLOC_026<br>292 | ENPP1     | chr6:132129155-132216301  | 1,347   | 5,953   | -2,14 | CRC < NCT | 5,00E-05 | 0,0020443 |
| XLOC_023<br>678 | FABP2     | chr4:120238404-120243316  | 11,389  | 50,455  | -2,15 | CRC < NCT | 0,0004   | 0,01042   |
| XLOC_000<br>259 | SFN       | chr1:27188857-27191094    | 138,060 | 611,870 | -2,15 | CRC < NCT | 5,00E-05 | 0,0020443 |
| XLOC_010<br>250 | ITPKA     | chr15:41785499-41808017   | 8,861   | 39,413  | -2,15 | CRC < NCT | 0,0006   | 0,0139198 |
| XLOC_014<br>548 | ACAA2     | chr18:47309873-47721526   | 63,396  | 301,837 | -2,16 | CRC < NCT | 0,0001   | 0,003647  |
| XLOC_002<br>354 | GPA33     | chr1:167011909-167060130  | 86,201  | 385,380 | -2,16 | CRC < NCT | 5,00E-05 | 0,0020443 |
| XLOC_001<br>607 | FUCA1     | chr1:24171571-24194859    | 45,110  | 202,283 | -2,16 | CRC < NCT | 5,00E-05 | 0,0020443 |
| XLOC_016<br>890 | CNNM4     | chr2:97426638-97480055    | 12,713  | 57,288  | -2,17 | CRC < NCT | 5,00E-05 | 0,0020443 |
| XLOC_025<br>322 | CCNJL     | chr5:159678541-159766599  | 2,789   | 12,576  | -2,17 | CRC < NCT | 5,00E-05 | 0,0020443 |
| XLOC_024<br>295 | GZMA      | chr5:54398473-54406080    | 15,139  | 68,418  | -2,18 | CRC < NCT | 5,00E-05 | 0,0020443 |
| XLOC_020<br>365 | HMOX1     | chr22:35777059-35790207   | 30,851  | 139,428 | -2,18 | CRC < NCT | 5,00E-05 | 0,0020443 |
| XLOC_019<br>547 | BCAS1     | chr20:52560062-52687304   | 18,878  | 85,853  | -2,19 | CRC < NCT | 5,00E-05 | 0,0020443 |
| XLOC_005<br>374 | ST3GAL4   | chr11:126225539-126284536 | 30,392  | 138,595 | -2,19 | CRC < NCT | 5,00E-05 | 0,0020443 |
| XLOC_012<br>055 | PRSS8     | chr16:31125950-31147151   | 132,236 | 603,664 | -2,19 | CRC < NCT | 5,00E-05 | 0,0020443 |

|                 |                                   |                           |         |          |       |           |          |           |
|-----------------|-----------------------------------|---------------------------|---------|----------|-------|-----------|----------|-----------|
| XLOC_024<br>522 | SLC22A4,SLC22A5                   | chr5:131628194-131731308  | 8,444   | 38,604   | -2,19 | CRC < NCT | 5,00E-05 | 0,0020443 |
| XLOC_022<br>293 | TNFSF10                           | chr3:172220032-172241385  | 39,592  | 181,623  | -2,20 | CRC < NCT | 5,00E-05 | 0,0020443 |
| XLOC_016<br>764 | MXD1                              | chr2:70142172-70170220    | 13,997  | 64,589   | -2,21 | CRC < NCT | 5,00E-05 | 0,0020443 |
| XLOC_010<br>294 | SQRDL                             | chr15:45923345-45995383   | 95,998  | 442,987  | -2,21 | CRC < NCT | 5,00E-05 | 0,0020443 |
| XLOC_026<br>534 | TDP2                              | chr6:24650147-24721261    | 65,613  | 303,027  | -2,21 | CRC < NCT | 0,0001   | 0,003647  |
| XLOC_029<br>234 | AHCYL2                            | chr7:128864854-129070167  | 23,112  | 107,475  | -2,22 | CRC < NCT | 5,00E-05 | 0,0020443 |
| XLOC_002<br>040 | ADORA3,TMIGD3                     | chr1:112025874-112106625  | 2,478   | 11,540   | -2,22 | CRC < NCT | 0,00105  | 0,0206545 |
| XLOC_009<br>203 | TMEM63C                           | chr14:77648101-77725838   | 0,723   | 3,371    | -2,22 | CRC < NCT | 0,001    | 0,0199726 |
| XLOC_010<br>393 | PAQR5                             | chr15:69591233-69740766   | 2,992   | 14,035   | -2,23 | CRC < NCT | 0,00285  | 0,0411153 |
| XLOC_004<br>984 | RARRES3                           | chr11:63304272-63313930   | 43,385  | 203,738  | -2,23 | CRC < NCT | 5,00E-05 | 0,0020443 |
| XLOC_021<br>785 | TRANK1                            | chr3:36861826-36986548    | 3,054   | 14,343   | -2,23 | CRC < NCT | 5,00E-05 | 0,0020443 |
| XLOC_000<br>153 | FBLIM1,TMEM82                     | chr1:16062549-16113085    | 27,285  | 128,778  | -2,24 | CRC < NCT | 5,00E-05 | 0,0020443 |
| XLOC_020<br>039 | TMPRSS2                           | chr21:42834709-42880085   | 57,027  | 269,789  | -2,24 | CRC < NCT | 5,00E-05 | 0,0020443 |
| XLOC_033<br>134 | TSPAN7                            | chrX:38420730-38548174    | 19,114  | 90,608   | -2,25 | CRC < NCT | 5,00E-05 | 0,0020443 |
| XLOC_015<br>636 | SIRT6                             | chr19:4174103-4182597     | 19,885  | 82,106   | -2,25 | CRC < NCT | 5,00E-05 | 0,0020443 |
| XLOC_016<br>731 | UGP2                              | chr2:64068097-64246595    | 92,129  | 437,902  | -2,25 | CRC < NCT | 5,00E-05 | 0,0020443 |
| XLOC_008<br>632 | SLC15A1                           | chr13:99335985-99404929   | 1,086   | 5,166    | -2,25 | CRC < NCT | 0,00135  | 0,0246666 |
| XLOC_031<br>519 | -                                 | chr8:82433964-82434350    | 133,363 | 634,857  | -2,25 | CRC < NCT | 5,00E-05 | 0,0020443 |
| XLOC_020<br>201 | PEX26                             | chr22:18555305-18583259   | 10,400  | 50,383   | -2,28 | CRC < NCT | 5,00E-05 | 0,0020443 |
| XLOC_009<br>254 | IFI27                             | chr14:94572229-94583040   | 655,882 | 3201,700 | -2,29 | CRC < NCT | 5,00E-05 | 0,0020443 |
| XLOC_025<br>462 | -                                 | chr5:17353813-17354498    | 58,902  | 288,064  | -2,29 | CRC < NCT | 5,00E-05 | 0,0020443 |
| XLOC_004<br>676 | SMPD1                             | chr11:6411643-6462697     | 14,575  | 71,779   | -2,30 | CRC < NCT | 5,00E-05 | 0,0020443 |
| XLOC_005<br>886 | POLD4                             | chr11:67083881-67169376   | 62,282  | 306,860  | -2,30 | CRC < NCT | 0,00045  | 0,0114127 |
| XLOC_029<br>932 | DENND2A                           | chr7:140216480-140340388  | 2,463   | 12,158   | -2,30 | CRC < NCT | 5,00E-05 | 0,0020443 |
| XLOC_032<br>498 | KLF4                              | chr9:110247132-110252047  | 48,108  | 238,279  | -2,31 | CRC < NCT | 5,00E-05 | 0,0020443 |
| XLOC_007<br>179 | CD163L1                           | chr12:7506163-7596977     | 2,729   | 13,610   | -2,32 | CRC < NCT | 5,00E-05 | 0,0020443 |
| XLOC_017<br>597 | XDH                               | chr2:31556972-31638224    | 4,970   | 24,802   | -2,32 | CRC < NCT | 0,0001   | 0,003647  |
| XLOC_004<br>722 | MICALCL                           | chr11:12297546-12383898   | 1,158   | 5,818    | -2,33 | CRC < NCT | 5,00E-05 | 0,0020443 |
| XLOC_034<br>329 | -                                 | chrX:147133674-147134430  | 131,372 | 661,829  | -2,33 | CRC < NCT | 5,00E-05 | 0,0020443 |
| XLOC_011<br>559 | MT1A,MT1E,MT1F,MT1H,<br>MT1M,MT2A | chr16:56642339-56705163   | 490,937 | 2477,580 | -2,34 | CRC < NCT | 0,0017   | 0,0290257 |
| XLOC_030<br>615 | STMN2                             | chr8:80523048-80578411    | 1,759   | 8,880    | -2,34 | CRC < NCT | 0,0023   | 0,035694  |
| XLOC_015<br>205 | CEACAM3                           | chr19:42300320-42315689   | 0,934   | 4,721    | -2,34 | CRC < NCT | 0,0026   | 0,0386713 |
| XLOC_020<br>368 | RASD2                             | chr22:35937351-35950052   | 2,974   | 15,082   | -2,34 | CRC < NCT | 5,00E-05 | 0,0020443 |
| XLOC_007<br>018 | ACADS                             | chr12:121163451-121177813 | 33,101  | 168,653  | -2,35 | CRC < NCT | 5,00E-05 | 0,0020443 |
| XLOC_001<br>853 | TTC22                             | chr1:55245379-55310140    | 7,440   | 38,147   | -2,36 | CRC < NCT | 5,00E-05 | 0,0020443 |
| XLOC_007<br>602 | TMCC3                             | chr12:94954008-95211930   | 4,200   | 21,724   | -2,37 | CRC < NCT | 5,00E-05 | 0,0020443 |
| XLOC_013<br>225 | GGT6                              | chr17:4459207-4464215     | 23,068  | 119,971  | -2,38 | CRC < NCT | 5,00E-05 | 0,0020443 |
| XLOC_007<br>953 | -                                 | chr12:53536471-53536847   | 3,286   | 17,139   | -2,38 | CRC < NCT | 0,002    | 0,03265   |

|                 |              |                                |         |          |       |           |          |           |
|-----------------|--------------|--------------------------------|---------|----------|-------|-----------|----------|-----------|
| XLOC_010<br>296 | SEMA6D       | chr15:47476402-48066602        | 2,063   | 10,797   | -2,39 | CRC < NCT | 5,00E-05 | 0,0020443 |
| XLOC_010<br>996 | MESP1        | chr15:90290475-90294540        | 2,895   | 15,177   | -2,39 | CRC < NCT | 0,00085  | 0,0178569 |
| XLOC_023<br>748 | NR3C2        | chr4:148999672-149496084       | 4,531   | 23,956   | -2,40 | CRC < NCT | 5,00E-05 | 0,0020443 |
| XLOC_029<br>361 | AOC1         | chr7:150549564-150558379       | 83,289  | 441,248  | -2,41 | CRC < NCT | 5,00E-05 | 0,0020443 |
| XLOC_012<br>998 | LOC100507002 | chr17:63096697-63113267        | 2,882   | 15,272   | -2,41 | CRC < NCT | 0,0024   | 0,0366226 |
| XLOC_011<br>438 | APOBR        | chr16:28474388-28518155        | 11,608  | 61,529   | -2,41 | CRC < NCT | 0,0001   | 0,003647  |
| XLOC_001<br>692 | TMEM54       | chr1:33352097-33366953         | 246,387 | 1307,070 | -2,41 | CRC < NCT | 5,00E-05 | 0,0020443 |
| XLOC_009<br>192 | FLVCR2       | chr14:76035585-76117107        | 2,061   | 10,947   | -2,41 | CRC < NCT | 5,00E-05 | 0,0020443 |
| XLOC_013<br>451 | MMP28        | chr17:34083248-34122725        | 8,297   | 44,090   | -2,41 | CRC < NCT | 5,00E-05 | 0,0020443 |
| XLOC_020<br>667 | MB           | chr22:36002810-36031040        | 5,649   | 30,021   | -2,41 | CRC < NCT | 0,0007   | 0,0155855 |
| XLOC_000<br>941 | LINC01133    | chr1:159930858-159957532       | 22,193  | 118,123  | -2,41 | CRC < NCT | 5,00E-05 | 0,0020443 |
| XLOC_016<br>304 | PTPRH        | chr19:55692598-55720874        | 14,798  | 79,074   | -2,42 | CRC < NCT | 5,00E-05 | 0,0020443 |
| XLOC_033<br>910 | GLRA4        | chrX:102957970-102983552       | 0,537   | 2,874    | -2,42 | CRC < NCT | 0,0033   | 0,045347  |
| XLOC_001<br>246 | C1orf115     | chr1:220863627-220872499       | 12,444  | 66,744   | -2,42 | CRC < NCT | 5,00E-05 | 0,0020443 |
| XLOC_021<br>040 | VIPR1        | chr3:42530790-42579666         | 10,988  | 59,038   | -2,43 | CRC < NCT | 5,00E-05 | 0,0020443 |
| XLOC_005<br>422 | CDHR5,IRF7   | chr11:612554-640705            | 54,704  | 294,449  | -2,43 | CRC < NCT | 0,0002   | 0,006387  |
| XLOC_016<br>512 | RSAD2        | chr2:6968684-7039891           | 2,025   | 10,905   | -2,43 | CRC < NCT | 0,00295  | 0,0419277 |
| XLOC_011<br>604 | CES2         | chr16:66965956-66979730        | 47,552  | 256,427  | -2,43 | CRC < NCT | 5,00E-05 | 0,0020443 |
| XLOC_011<br>605 | CES3         | chr16:66994988-67009313        | 9,828   | 53,002   | -2,43 | CRC < NCT | 5,00E-05 | 0,0020443 |
| XLOC_016<br>068 | ETHE1,PHLDB3 | chr19:43978426-44031825        | 187,304 | 1015,600 | -2,44 | CRC < NCT | 5,00E-05 | 0,0020443 |
| XLOC_011<br>266 | MIR940       | chr16:2318575-2323595          | 0,541   | 2,936    | -2,44 | CRC < NCT | 0,00045  | 0,0114127 |
| XLOC_001<br>415 | FAM132A      | chr1:1177825-1183427           | 4,133   | 22,564   | -2,45 | CRC < NCT | 0,00165  | 0,0284652 |
| XLOC_011<br>343 | TNFRSF17     | chr16:12058963-12061925        | 5,459   | 29,915   | -2,45 | CRC < NCT | 0,0004   | 0,01042   |
| XLOC_009<br>721 | ENTPD5       | chr14:74318388-74551216        | 11,188  | 61,578   | -2,46 | CRC < NCT | 0,00055  | 0,0131101 |
| XLOC_015<br>935 | -            | chr19:35914477-35925512        | 0,166   | 0,923    | -2,48 | CRC < NCT | 0,00275  | 0,0400849 |
| XLOC_000<br>068 | ESPN         | chr1:6484847-6580121           | 5,791   | 32,401   | -2,48 | CRC < NCT | 0,00045  | 0,0114127 |
| XLOC_021<br>598 | LOC344887    | chr3:185677633-185703042       | 0,382   | 2,154    | -2,50 | CRC < NCT | 0,0023   | 0,035694  |
| XLOC_010<br>819 | CA12         | chr15:63605508-63674762        | 31,232  | 176,284  | -2,50 | CRC < NCT | 5,00E-05 | 0,0020443 |
| XLOC_025<br>758 | GCNT2        | chr6:10521567-10629632         | 1,318   | 7,462    | -2,50 | CRC < NCT | 0,0026   | 0,0386713 |
| XLOC_024<br>745 | CDHR2        | chr5:175953699-176037131       | 13,743  | 78,065   | -2,51 | CRC < NCT | 0,0002   | 0,006387  |
| XLOC_008<br>971 | -            | chr14:22918564-22935569        | 1,859   | 10,645   | -2,52 | CRC < NCT | 0,00055  | 0,0131101 |
| XLOC_026<br>498 | ADTRP        | chr6:11711517-11803262         | 24,896  | 142,892  | -2,52 | CRC < NCT | 5,00E-05 | 0,0020443 |
| XLOC_030<br>632 | ATP6V0D2     | chr8:871111110-87166464        | 0,572   | 3,292    | -2,52 | CRC < NCT | 0,0013   | 0,0239449 |
| XLOC_021<br>518 | ARL14        | chr3:160394776-160398761       | 16,719  | 96,348   | -2,53 | CRC < NCT | 5,00E-05 | 0,0020443 |
| XLOC_028<br>562 | HLA-A        | chr6_ssto_hap7:1239291-1243012 | 12,525  | 72,711   | -2,54 | CRC < NCT | 0,0008   | 0,0171221 |
| XLOC_002<br>306 | IGSF9        | chr1:159896742-159915791       | 6,159   | 35,777   | -2,54 | CRC < NCT | 5,00E-05 | 0,0020443 |
| XLOC_026<br>551 | HIST1H1C     | chr6:26044483-26056854         | 52,394  | 304,814  | -2,54 | CRC < NCT | 5,00E-05 | 0,0020443 |
| XLOC_023<br>541 | NAAA         | chr4:76831807-76862252         | 21,507  | 125,791  | -2,55 | CRC < NCT | 5,00E-05 | 0,0020443 |

|                 |                                                                         |                           |         |          |       |           |          |           |
|-----------------|-------------------------------------------------------------------------|---------------------------|---------|----------|-------|-----------|----------|-----------|
| XLOC_005<br>155 | MOGAT2                                                                  | chr11:75412617-75446941   | 4,418   | 25,843   | -2,55 | CRC < NCT | 0,0004   | 0,01042   |
| XLOC_022<br>329 | CLCN2                                                                   | chr3:184053716-184086516  | 7,210   | 42,557   | -2,56 | CRC < NCT | 0,0007   | 0,0155855 |
| XLOC_016<br>366 | -                                                                       | chr19:291719-296164       | 0,113   | 0,672    | -2,57 | CRC < NCT | 0,0031   | 0,0433833 |
| XLOC_028<br>786 | SCIN                                                                    | chr7:12609038-12699802    | 5,938   | 35,831   | -2,59 | CRC < NCT | 5,00E-05 | 0,0020443 |
| XLOC_017<br>132 | DHRS9                                                                   | chr2:169923544-169952678  | 49,230  | 300,455  | -2,61 | CRC < NCT | 5,00E-05 | 0,0020443 |
| XLOC_029<br>704 | SRI                                                                     | chr7:87563476-87856352    | 281,592 | 1725,890 | -2,62 | CRC < NCT | 5,00E-05 | 0,0020443 |
| XLOC_027<br>026 | SGK1                                                                    | chr6:134490383-134639196  | 31,026  | 192,109  | -2,63 | CRC < NCT | 5,00E-05 | 0,0020443 |
| XLOC_019<br>069 | SGK2                                                                    | chr20:42187576-42216951   | 11,618  | 72,776   | -2,65 | CRC < NCT | 5,00E-05 | 0,0020443 |
| XLOC_012<br>202 | PHLPP2                                                                  | chr16:71678602-71759685   | 2,235   | 14,018   | -2,65 | CRC < NCT | 5,00E-05 | 0,0020443 |
| XLOC_020<br>682 | TST                                                                     | chr22:37406866-37425863   | 146,837 | 924,088  | -2,65 | CRC < NCT | 5,00E-05 | 0,0020443 |
| XLOC_013<br>065 | MYO15B,SMIM5                                                            | chr17:73583591-73704142   | 10,136  | 64,342   | -2,67 | CRC < NCT | 5,00E-05 | 0,0020443 |
| XLOC_004<br>338 | -                                                                       | chr10:134266775-134272610 | 0,250   | 1,611    | -2,68 | CRC < NCT | 0,00305  | 0,0429805 |
| XLOC_017<br>406 | UGT1A1,UGT1A10,UGT1A3<br>,UGT1A4,UGT1A5,UGT1A6,<br>UGT1A7,UGT1A8,UGT1A9 | chr2:234512410-234681951  | 29,712  | 191,995  | -2,69 | CRC < NCT | 5,00E-05 | 0,0020443 |
| XLOC_026<br>797 | CLIC5                                                                   | chr6:45866123-46048085    | 9,385   | 61,445   | -2,71 | CRC < NCT | 5,00E-05 | 0,0020443 |
| XLOC_029<br>701 | ABCB1,ABCB4                                                             | chr7:87031137-87461623    | 5,996   | 39,329   | -2,71 | CRC < NCT | 5,00E-05 | 0,0020443 |
| XLOC_022<br>411 | PIGZ                                                                    | chr3:196673157-196702293  | 7,520   | 49,525   | -2,72 | CRC < NCT | 5,00E-05 | 0,0020443 |
| XLOC_026<br>266 | SMPDL3A                                                                 | chr6:123108303-123130868  | 14,308  | 94,439   | -2,72 | CRC < NCT | 5,00E-05 | 0,0020443 |
| XLOC_015<br>225 | ZNF575                                                                  | chr19:44033447-44044038   | 1,406   | 9,324    | -2,73 | CRC < NCT | 0,00035  | 0,0094833 |
| XLOC_016<br>033 | B3GNT8                                                                  | chr19:41903599-41934635   | 9,357   | 62,880   | -2,75 | CRC < NCT | 0,0004   | 0,01042   |
| XLOC_006<br>104 | NXPE4                                                                   | chr11:114389414-114522285 | 22,689  | 152,639  | -2,75 | CRC < NCT | 0,00165  | 0,0284652 |
| XLOC_018<br>915 | LOC101929395                                                            | chr20:10727477-10735362   | 3,843   | 26,081   | -2,76 | CRC < NCT | 0,0031   | 0,0433833 |
| XLOC_014<br>582 | RNF152                                                                  | chr18:59475294-59561575   | 0,907   | 6,160    | -2,76 | CRC < NCT | 5,00E-05 | 0,0020443 |
| XLOC_019<br>019 | TP53INP2                                                                | chr20:33291914-33301245   | 13,659  | 93,532   | -2,78 | CRC < NCT | 5,00E-05 | 0,0020443 |
| XLOC_005<br>836 | NAALADL1                                                                | chr11:64808366-64826017   | 2,739   | 18,819   | -2,78 | CRC < NCT | 0,00175  | 0,0294656 |
| XLOC_032<br>221 | LRRC19                                                                  | chr9:26903194-27066091    | 5,933   | 41,575   | -2,81 | CRC < NCT | 0,00125  | 0,0233782 |
| XLOC_007<br>794 | CRAT8                                                                   | chr12:128507189-128511738 | 3,544   | 24,868   | -2,81 | CRC < NCT | 0,00215  | 0,0341212 |
| XLOC_032<br>212 | CDKN2B                                                                  | chr9:21994789-22122216    | 5,313   | 37,473   | -2,82 | CRC < NCT | 5,00E-05 | 0,0020443 |
| XLOC_001<br>549 | PADI2                                                                   | chr1:17393035-17445948    | 5,708   | 40,475   | -2,83 | CRC < NCT | 0,00015  | 0,0050841 |
| XLOC_011<br>616 | HSD11B2                                                                 | chr16:67461562-67515171   | 55,368  | 393,134  | -2,83 | CRC < NCT | 0,00055  | 0,0131101 |
| XLOC_009<br>243 | CHGA                                                                    | chr14:93389023-93401645   | 21,920  | 155,794  | -2,83 | CRC < NCT | 5,00E-05 | 0,0020443 |
| XLOC_024<br>358 | TMEM171                                                                 | chr5:72407211-72430445    | 15,689  | 112,125  | -2,84 | CRC < NCT | 5,00E-05 | 0,0020443 |
| XLOC_030<br>436 | ADAMDEC1                                                                | chr8:24151541-24406131    | 14,991  | 107,694  | -2,84 | CRC < NCT | 5,00E-05 | 0,0020443 |
| XLOC_015<br>866 | TM6SF2                                                                  | chr19:19374870-19384151   | 1,618   | 11,654   | -2,85 | CRC < NCT | 0,00135  | 0,0246666 |
| XLOC_003<br>812 | LINC00704                                                               | chr10:4648043-4720262     | 0,371   | 2,715    | -2,87 | CRC < NCT | 0,0037   | 0,0490331 |
| XLOC_005<br>592 | TPH1                                                                    | chr11:18038890-18067349   | 0,331   | 2,421    | -2,87 | CRC < NCT | 0,0017   | 0,0290257 |
| XLOC_004<br>020 | SLC16A9                                                                 | chr10:61410501-61469649   | 2,628   | 19,321   | -2,88 | CRC < NCT | 5,00E-05 | 0,0020443 |
| XLOC_032<br>740 | ENTPD8                                                                  | chr9:140317836-140336300  | 11,847  | 87,523   | -2,89 | CRC < NCT | 0,0004   | 0,01042   |

|                 |                 |                           |        |         |       |           |          |           |
|-----------------|-----------------|---------------------------|--------|---------|-------|-----------|----------|-----------|
| XLOC_029<br>255 | AKR1B10,AKR1B15 | chr7:134212314-134264592  | 16,766 | 125,109 | -2,90 | CRC < NCT | 5,00E-05 | 0,0020443 |
| XLOC_003<br>530 | C10orf99        | chr10:85933383-85945050   | 96,905 | 737,688 | -2,93 | CRC < NCT | 5,00E-05 | 0,0020443 |
| XLOC_006<br>175 | VSIG2           | chr11:124617369-124622109 | 40,620 | 311,716 | -2,94 | CRC < NCT | 5,00E-05 | 0,0020443 |
| XLOC_021<br>955 | DNASE1L3        | chr3:58178321-58200115    | 7,779  | 60,557  | -2,96 | CRC < NCT | 5,00E-05 | 0,0020443 |
| XLOC_012<br>720 | DHRS11          | chr17:34948225-34957234   | 23,550 | 183,565 | -2,96 | CRC < NCT | 5,00E-05 | 0,0020443 |
| XLOC_011<br>703 | HSD17B2         | chr16:82068623-82132141   | 41,950 | 331,114 | -2,98 | CRC < NCT | 5,00E-05 | 0,0020443 |
| XLOC_001<br>938 | MCOLN2          | chr1:85391204-85463890    | 2,248  | 17,918  | -2,99 | CRC < NCT | 5,00E-05 | 0,0020443 |
| XLOC_012<br>894 | B4GALNT2        | chr17:47209821-47256017   | 3,539  | 28,243  | -3,00 | CRC < NCT | 0,0013   | 0,0239449 |
| XLOC_012<br>495 | WSCD1           | chr17:5973873-6027911     | 1,262  | 10,100  | -3,00 | CRC < NCT | 0,00015  | 0,0050841 |
| XLOC_026<br>962 | -               | chr6:110851862-110887817  | 0,467  | 3,741   | -3,00 | CRC < NCT | 0,0006   | 0,0139198 |
| XLOC_003<br>441 | MYPN            | chr10:69865873-69971773   | 0,111  | 0,891   | -3,01 | CRC < NCT | 0,00025  | 0,0074979 |
| XLOC_033<br>288 | GDPD2           | chrX:69642880-69653553    | 2,399  | 19,463  | -3,02 | CRC < NCT | 0,0002   | 0,006387  |
| XLOC_023<br>571 | PLAC8           | chr4:84005880-84036150    | 71,217 | 581,748 | -3,03 | CRC < NCT | 5,00E-05 | 0,0020443 |
| XLOC_023<br>004 | SLC4A4          | chr4:72052460-72438207    | 3,932  | 32,269  | -3,04 | CRC < NCT | 5,00E-05 | 0,0020443 |
| XLOC_023<br>816 | HPGD            | chr4:175410208-175462407  | 16,339 | 134,572 | -3,04 | CRC < NCT | 5,00E-05 | 0,0020443 |
| XLOC_024<br>877 | SLC45A2         | chr5:33943658-33984968    | 0,077  | 0,637   | -3,04 | CRC < NCT | 0,0016   | 0,0279196 |
| XLOC_017<br>593 | CAPN13          | chr2:30945637-31030321    | 1,596  | 13,243  | -3,05 | CRC < NCT | 0,0001   | 0,003647  |
| XLOC_012<br>220 | LDHD            | chr16:75032914-75150695   | 9,361  | 77,716  | -3,05 | CRC < NCT | 0,00035  | 0,0094833 |
| XLOC_015<br>481 | KIR2DL4,KIR3DL2 | chr19:55315003-55378692   | 0,060  | 0,502   | -3,06 | CRC < NCT | 0,00145  | 0,0259223 |
| XLOC_013<br>517 | KRT12           | chr17:39017201-39024905   | 0,226  | 1,910   | -3,08 | CRC < NCT | 0,00035  | 0,0094833 |
| XLOC_024<br>785 | BTNL3,BTNL8     | chr5:180326064-180434228  | 17,670 | 149,543 | -3,08 | CRC < NCT | 5,00E-05 | 0,0020443 |
| XLOC_005<br>062 | C11orf86        | chr11:66742630-66744483   | 12,530 | 107,039 | -3,09 | CRC < NCT | 5,00E-05 | 0,0020443 |
| XLOC_027<br>149 | FRMD1           | chr6:168453753-168502179  | 4,025  | 34,551  | -3,10 | CRC < NCT | 5,00E-05 | 0,0020443 |
| XLOC_002<br>095 | HMGCS2          | chr1:120290618-120311774  | 71,352 | 628,998 | -3,14 | CRC < NCT | 5,00E-05 | 0,0020443 |
| XLOC_023<br>559 | PRKG2           | chr4:82007433-82139110    | 0,478  | 4,239   | -3,15 | CRC < NCT | 5,00E-05 | 0,0020443 |
| XLOC_019<br>853 | PDE9A           | chr21:44073817-44195624   | 13,934 | 124,588 | -3,16 | CRC < NCT | 5,00E-05 | 0,0020443 |
| XLOC_021<br>047 | ACKR2           | chr3:42846160-42910802    | 0,273  | 2,478   | -3,18 | CRC < NCT | 0,0001   | 0,003647  |
| XLOC_016<br>994 | TMEM37          | chr2:120187526-120282028  | 18,226 | 166,230 | -3,19 | CRC < NCT | 5,00E-05 | 0,0020443 |
| XLOC_021<br>275 | HHLA2           | chr3:108014321-108248169  | 17,340 | 158,261 | -3,19 | CRC < NCT | 5,00E-05 | 0,0020443 |
| XLOC_017<br>213 | C2orf88         | chr2:191002485-191184771  | 4,707  | 42,985  | -3,19 | CRC < NCT | 0,00025  | 0,0074979 |
| XLOC_005<br>317 | PDZD3           | chr11:119056141-119076916 | 3,491  | 31,949  | -3,19 | CRC < NCT | 5,00E-05 | 0,0020443 |
| XLOC_012<br>912 | ACSF2           | chr17:48503518-48553433   | 11,776 | 108,082 | -3,20 | CRC < NCT | 5,00E-05 | 0,0020443 |
| XLOC_001<br>130 | -               | chr1:200889607-200935959  | 0,540  | 5,018   | -3,22 | CRC < NCT | 5,00E-05 | 0,0020443 |
| XLOC_019<br>950 | CLDN8           | chr21:31586323-31588469   | 3,852  | 35,775  | -3,22 | CRC < NCT | 0,0007   | 0,0155855 |
| XLOC_023<br>048 | BMP3            | chr4:81951749-81979417    | 0,841  | 7,840   | -3,22 | CRC < NCT | 0,00035  | 0,0094833 |
| XLOC_017<br>134 | -               | chr2:169958246-169963721  | 0,438  | 4,097   | -3,23 | CRC < NCT | 0,00305  | 0,0429805 |
| XLOC_021<br>656 | SLC51A          | chr3:195943043-196015331  | 13,468 | 126,663 | -3,23 | CRC < NCT | 5,00E-05 | 0,0020443 |
| XLOC_020<br>041 | -               | chr21:42924030-42935777   | 0,786  | 7,399   | -3,23 | CRC < NCT | 0,0007   | 0,0155855 |

|                 |                 |                           |         |          |       |           |          |           |
|-----------------|-----------------|---------------------------|---------|----------|-------|-----------|----------|-----------|
| XLOC_025<br>805 | SCGN            | chr6:25652428-25702008    | 1,214   | 11,623   | -3,26 | CRC < NCT | 0,00055  | 0,0131101 |
| XLOC_019<br>159 | PCK1            | chr20:56135307-56146417   | 27,240  | 260,923  | -3,26 | CRC < NCT | 5,00E-05 | 0,0020443 |
| XLOC_014<br>289 | MEP1B           | chr18:29769986-29802585   | 1,961   | 18,882   | -3,27 | CRC < NCT | 0,00215  | 0,0341212 |
| XLOC_019<br>174 | EDN3            | chr20:57875469-57901049   | 4,537   | 43,791   | -3,27 | CRC < NCT | 5,00E-05 | 0,0020443 |
| XLOC_011<br>422 | CHP2            | chr16:23765947-23791318   | 23,451  | 232,440  | -3,31 | CRC < NCT | 0,00015  | 0,0050841 |
| XLOC_013<br>951 | CD7,SECTM1      | chr17:80271360-80293275   | 21,448  | 213,071  | -3,31 | CRC < NCT | 5,00E-05 | 0,0020443 |
| XLOC_014<br>921 | BEST2           | chr19:12861469-12869274   | 2,599   | 25,918   | -3,32 | CRC < NCT | 0,0007   | 0,0155855 |
| XLOC_012<br>009 | SULT1A1,SULT1A2 | chr16:28564867-28634915   | 25,429  | 257,191  | -3,34 | CRC < NCT | 5,00E-05 | 0,0020443 |
| XLOC_016<br>825 | SH2D6           | chr2:85655769-85664152    | 0,636   | 6,869    | -3,43 | CRC < NCT | 0,002    | 0,03265   |
| XLOC_002<br>520 | LRRN2           | chr1:204586301-204654597  | 1,378   | 14,981   | -3,44 | CRC < NCT | 5,00E-05 | 0,0020443 |
| XLOC_025<br>808 | SLC17A4         | chr6:25753540-25832287    | 2,849   | 31,741   | -3,48 | CRC < NCT | 5,00E-05 | 0,0020443 |
| XLOC_010<br>998 | ANPEP           | chr15:90328050-90358075   | 132,923 | 1486,220 | -3,48 | CRC < NCT | 0,00345  | 0,046739  |
| XLOC_012<br>649 | SLC13A2         | chr17:26800332-26824800   | 1,650   | 19,149   | -3,54 | CRC < NCT | 5,00E-05 | 0,0020443 |
| XLOC_009<br>420 | ASPG            | chr14:104546675-104581918 | 1,663   | 19,333   | -3,54 | CRC < NCT | 0,0017   | 0,0290257 |
| XLOC_010<br>371 | SLC51B          | chr15:65337119-65360650   | 22,061  | 259,714  | -3,56 | CRC < NCT | 0,0008   | 0,0171221 |
| XLOC_003<br>279 | TMEM236         | chr10:17794211-18200192   | 1,598   | 18,852   | -3,56 | CRC < NCT | 0,002    | 0,03265   |
| XLOC_000<br>168 | PADI2           | chr1:17393035-17445948    | 10,846  | 136,435  | -3,65 | CRC < NCT | 0,00055  | 0,0131101 |
| XLOC_026<br>264 | PKIB            | chr6:122793061-123047518  | 13,850  | 175,431  | -3,66 | CRC < NCT | 5,00E-05 | 0,0020443 |
| XLOC_015<br>363 | SPIB            | chr19:50922194-50934309   | 2,007   | 25,529   | -3,67 | CRC < NCT | 5,00E-05 | 0,0020443 |
| XLOC_031<br>701 | HRCT1           | chr9:35905275-35907827    | 5,938   | 76,262   | -3,68 | CRC < NCT | 5,00E-05 | 0,0020443 |
| XLOC_030<br>351 | CLDN23          | chr8:8316017-8637584      | 10,876  | 140,792  | -3,69 | CRC < NCT | 5,00E-05 | 0,0020443 |
| XLOC_001<br>890 | INSL5           | chr1:67263423-67266942    | 6,361   | 84,645   | -3,73 | CRC < NCT | 0,00025  | 0,0074979 |
| XLOC_022<br>355 | SST             | chr3:187386693-187388201  | 2,687   | 35,887   | -3,74 | CRC < NCT | 0,00035  | 0,0094833 |
| XLOC_000<br>226 | LOC284632       | chr1:24523685-24547792    | 0,078   | 1,058    | -3,76 | CRC < NCT | 0,00345  | 0,046739  |
| XLOC_007<br>110 | P2RX2           | chr12:133195365-133198972 | 0,025   | 0,343    | -3,77 | CRC < NCT | 5,00E-05 | 0,0020443 |
| XLOC_014<br>441 | LAMA1           | chr18:6941742-7117813     | 4,092   | 56,753   | -3,79 | CRC < NCT | 5,00E-05 | 0,0020443 |
| XLOC_033<br>818 | TEX11           | chrX:69744363-70128567    | 1,598   | 23,487   | -3,88 | CRC < NCT | 0,00215  | 0,0341212 |
| XLOC_011<br>419 | SCNN1B          | chr16:23313590-23392620   | 5,401   | 79,995   | -3,89 | CRC < NCT | 5,00E-05 | 0,0020443 |
| XLOC_024<br>635 | SLC26A2         | chr5:149340299-149367040  | 19,866  | 300,034  | -3,92 | CRC < NCT | 5,00E-05 | 0,0020443 |
| XLOC_022<br>937 | CWH43           | chr4:48988264-49064095    | 1,147   | 18,036   | -3,97 | CRC < NCT | 5,00E-05 | 0,0020443 |
| XLOC_002<br>747 | LYPD8           | chr1:248898171-248907165  | 142,374 | 2314,010 | -4,02 | CRC < NCT | 0,0009   | 0,0185023 |
| XLOC_031<br>776 | -               | chr9:74868084-74875166    | 0,185   | 3,030    | -4,03 | CRC < NCT | 0,0003   | 0,0084946 |
| XLOC_018<br>085 | ABCB11          | chr2:169770712-169887833  | 0,098   | 1,629    | -4,06 | CRC < NCT | 0,00035  | 0,0094833 |
| XLOC_025<br>267 | PDE6A           | chr5:149237303-149324681  | 0,236   | 4,097    | -4,12 | CRC < NCT | 0,00345  | 0,046739  |
| XLOC_012<br>967 | CA4             | chr17:58225176-58245480   | 65,670  | 1148,350 | -4,13 | CRC < NCT | 5,00E-05 | 0,0020443 |
| XLOC_012<br>601 | LGALS9C         | chr17:18380055-18398259   | 2,246   | 39,664   | -4,14 | CRC < NCT | 5,00E-05 | 0,0020443 |
| XLOC_005<br>753 | -               | chr11:59025629-59039458   | 0,053   | 0,946    | -4,17 | CRC < NCT | 0,0036   | 0,0481629 |
| XLOC_003<br>373 | TMEM72          | chr10:45306471-45455137   | 0,499   | 9,131    | -4,19 | CRC < NCT | 0,00285  | 0,0411153 |

|                 |              |                          |        |          |       |           |          |           |
|-----------------|--------------|--------------------------|--------|----------|-------|-----------|----------|-----------|
| XLOC_013<br>420 | TMIGD1       | chr17:28638007-28661105  | 9,489  | 181,241  | -4,26 | CRC < NCT | 5,00E-05 | 0,0020443 |
| XLOC_006<br>863 | -            | chr12:90353865-90537187  | 0,302  | 5,790    | -4,26 | CRC < NCT | 0,00015  | 0,0050841 |
| XLOC_032<br>369 | TRPM6        | chr9:77337401-77503010   | 1,868  | 39,694   | -4,41 | CRC < NCT | 5,00E-05 | 0,0020443 |
| XLOC_005<br>810 | HRASLS2      | chr11:63320238-63332522  | 3,408  | 76,509   | -4,49 | CRC < NCT | 5,00E-05 | 0,0020443 |
| XLOC_004<br>933 | MS4A12       | chr11:60260065-60281276  | 45,502 | 1040,390 | -4,52 | CRC < NCT | 5,00E-05 | 0,0020443 |
| XLOC_020<br>976 | -            | chr3:23688102-23711786   | 0,080  | 1,894    | -4,57 | CRC < NCT | 5,00E-05 | 0,0020443 |
| XLOC_005<br>582 | LOC102724957 | chr11:15665430-15790137  | 1,346  | 32,281   | -4,58 | CRC < NCT | 0,00085  | 0,0178569 |
| XLOC_000<br>375 | GUCA2B       | chr1:42618863-42622649   | 51,235 | 1351,410 | -4,72 | CRC < NCT | 0,0003   | 0,0084946 |
| XLOC_024<br>181 | SLC6A19      | chr5:1201695-1225242     | 0,367  | 10,217   | -4,80 | CRC < NCT | 0,0001   | 0,003647  |
| XLOC_015<br>229 | -            | chr19:44191723-44204678  | 0,230  | 6,604    | -4,84 | CRC < NCT | 5,00E-05 | 0,0020443 |
| XLOC_023<br>591 | ABCG2        | chr4:89008292-89152474   | 1,334  | 38,468   | -4,85 | CRC < NCT | 5,00E-05 | 0,0020443 |
| XLOC_014<br>696 | -            | chr18:60108511-60110981  | 0,016  | 0,488    | -4,89 | CRC < NCT | 0,0038   | 0,049887  |
| XLOC_014<br>365 | -            | chr18:60076883-60078706  | 0,069  | 2,074    | -4,92 | CRC < NCT | 0,0016   | 0,0279196 |
| XLOC_011<br>602 | CA7          | chr16:66875156-66907511  | 4,674  | 145,288  | -4,96 | CRC < NCT | 0,00045  | 0,0114127 |
| XLOC_015<br>223 | CD177        | chr19:43857774-43874750  | 16,815 | 662,578  | -5,30 | CRC < NCT | 5,00E-05 | 0,0020443 |
| XLOC_013<br>050 | OTOP2        | chr17:72920146-72930054  | 2,564  | 102,070  | -5,32 | CRC < NCT | 0,0002   | 0,006387  |
| XLOC_002<br>278 | -            | chr1:157462222-157467905 | 0,030  | 1,424    | -5,57 | CRC < NCT | 0,0008   | 0,0171221 |
| XLOC_024<br>060 | -            | chr4:149555490-149558069 | 0,043  | 3,475    | -6,35 | CRC < NCT | 5,00E-05 | 0,0020443 |



**Table S3**

The enriched Gene Ontology (GO) categories of differentially expressed genes in colorectal carcinoma.

| ID                     | Title                             | CRC>N<br>CT logP | CRC<N<br>CT logP | CRC>NCT GeneSet                                                                                                                                                                                                                                                                                                                                                                                                                                                                                                                                                                                                                                                                                           | CRC<NCT GeneSet                                                                                                                                                                                                                                                                                                                                                                                                                                                                                                                                                                                                                                     |
|------------------------|-----------------------------------|------------------|------------------|-----------------------------------------------------------------------------------------------------------------------------------------------------------------------------------------------------------------------------------------------------------------------------------------------------------------------------------------------------------------------------------------------------------------------------------------------------------------------------------------------------------------------------------------------------------------------------------------------------------------------------------------------------------------------------------------------------------|-----------------------------------------------------------------------------------------------------------------------------------------------------------------------------------------------------------------------------------------------------------------------------------------------------------------------------------------------------------------------------------------------------------------------------------------------------------------------------------------------------------------------------------------------------------------------------------------------------------------------------------------------------|
| GO: Biological Process |                                   |                  |                  | <b>Gene List</b>                                                                                                                                                                                                                                                                                                                                                                                                                                                                                                                                                                                                                                                                                          |                                                                                                                                                                                                                                                                                                                                                                                                                                                                                                                                                                                                                                                     |
| GO:0051276             | chromosome organization           | 10,0000          |                  | ANP32E ASCC3 ATAD2 ATRX AXIN2 BCOR BIRC5 BRCA1 BUB1 CBX2 CBX4 CCNB1 CCT2 CCT6A CDC45 CDC6 CDCA8 CDK1 DNMT1 DSCC1 GINS1 HELLS HUJURP HLTTF HMGA1B HMGA2 HUWE1 IL1B INCENP JADE3 KAT2AKIF14 KIF18A KIF18B KIF2C KIF4A LIF MAD2L1 MAPK15 MCM2 MCM3MCM4 MCM6 MSH2 NAP1L1 NBN NCAPG NCAPG2 NCAPH NEK2 NPM1 NUF2 NUP107 NUP155 PARP1 PHF19 PRC1 PRKDC RACGAP1 RCBTB1 RCC2 RFC3 RRS1 RUVBL1 SMARCAD1 SMARCC1 SMC2 SMC4 SOX9 STIL TCF3 TOP1MT TOP2A TP53 TTK UBE2C UHRF1 VENTX WDHD1 WDR75YEATS2 ZWINT                                                                                                                                                                                                            |                                                                                                                                                                                                                                                                                                                                                                                                                                                                                                                                                                                                                                                     |
| GO:0019637             | organophosphate metabolic process |                  | 10,0000          |                                                                                                                                                                                                                                                                                                                                                                                                                                                                                                                                                                                                                                                                                                           | ABHD3 ACHE ADCY9 ADM ADRA2A ADSL AGPAT2 ASPG ATP5D ATP5IBAD CDA CHCHD10 CHGA COX41 COX5B COX6A1 COX6B1 COX7BCOX8A CRYL1 CWH43 DOLPP1 ECE1 ENPP1 ENTPD5 ENTPD8 FGF2R2GPD1L GUCA2B HK2 IDH3A IMPA2 INPP5J IP6K2 ITPKA KLF4 LDHDLGALS13 LIPC LPCAT1 MBOAT1 MBOAT2 MPC1 MPI MTM1 NDUF6NDUFB7 P2RY1 PAPS52 PCK1 PCK2 PDE6A PDE8A PDGFA PDGFA PDGFA PDGFA PDGFA PGM1 PGM1 PID1 PIGZ PLCD3 PLCE1 PPARC PRKCD PTGER4PTK2B RARRS3 SERINC2 SIRT6 SLC25A23 SLC26A2 SMPD1 SMPDL3ASUCLG1 UGP2 UPP1 UQCR10 UQCR1 UQCRFS1 XDH                                                                                                                                      |
| GO:0044255             | cellular lipid metabolic process  |                  | 10,0000          |                                                                                                                                                                                                                                                                                                                                                                                                                                                                                                                                                                                                                                                                                                           | ABCG1 ABHD3 ACAA2 ACADS ACADVL ACHE ACOT8 ACOX1 ACSF2ACSS2 AGPAT2 APOBR ARSA ASPG BSGNT5 B4GALNT2 CES1 CPT1A CPT2 CPTP CRAT CRYL1 CWH43 CYP2J2 DECR1 DHRS3 DHRS9 DOLP1E1CHD2 ECHS1 EC11 EC12 EPHX2 ETFA ETFB ETFDH FABP2 FGF2R2 GGT6GLTP GPD1L HADH HMGS2 HPGD IMPA2 INPP5J IP6K2 ISX KLF4L2GALS13 LIPC LPCAT1 MBOAT1 MBOAT2 MGLL MOGAT2 MTM1 NANS PCK1 PDGFA PDK2 PGAP3 PHYH PIGZ PLCE1 PPARC PPARG PRKCDPTK2B RARRS3 RETSAT RXRA SERINC2 SESN2 SLC27A2 SMPD1 SMPDL3A STG3AL4 THRB                                                                                                                                                                 |
| GO:0000280             | nuclear division                  | 10,0000          |                  | ANAPC1 ANLN ATRX BIRC5 BMP4 BMP7 BRSK2 BUB1 CCNB1 CDC25ACDC25B CDC6 CDCA2 CDCA8 CDK1 CDK2 CENPE CENPF CEP55 CHEK1 CKS2 DSCC1 HAUS6 HELLS HMGA2 IL1A IL1B INCENP KIF11 KIF14KIF18A KIF18B KIF2C KIF4A LIF MAD2L1 MET MKI67 MSH2 MSX2 MYBL2NCAPG NCAPG2 NCAPH NEK2 NOLC1 NUF2 PBK PRC1 RACGAP1 RANRCC2 RRS1 RUVBL1 SMC2 SMC4 STIL TIMELESS TOP2A TPX2 TTK UBE2CXRC2 ZWINT                                                                                                                                                                                                                                                                                                                                   |                                                                                                                                                                                                                                                                                                                                                                                                                                                                                                                                                                                                                                                     |
| GO:1903047             | mitotic cell cycle process        | 10,0000          |                  | AJUBA ANAPC1 ANLN ARID3A ATRX BIRC5 BMP4 BMP7 BRSK2 BUB1CCNB1 CCND1 CDC25A CDC25B CDC45 CDC6 CDCA2 CDCA8 CDK1 CDK2 CDK4 CDK6 CDKN2A CENPE CENPF CEP55 CHEK1 CKA2 CKS2CLSPN DSCC1 E2F7 FOXM1 GINS1 GPM2 GTSE1 HAUS6 HELLS HMGA2IL1A IL1B INCENP INHBA IQGAP3 KIF11 KIF14 KIF18A KIF18B KIF2C KIF4A LMNB1 MAD2L1 MCM10 MCM2 MCM3 MCM4 MCM6 MELK METMSH2 MYBL2 NBN NCAPG NCAPG2 NCAPH NEK2 NOLC1 NPM1 NUF2NUP107 NUP155 NUP205 NUP210 NUP58 PBK PHLDA1 PLK2 PLK4PPAT PRC1 PRKDC RACGAP1 RAN RCC2 RRM2 RRS1 RUVBL1 SKP2 SMC2SMC4 SOX4 STIL STMN1 TCF3 TIMELESS TOP2A TP53 TPD52L1 TPX2 TTKUBEC2 WDR43 WDR62 ZWINT                                                                                             |                                                                                                                                                                                                                                                                                                                                                                                                                                                                                                                                                                                                                                                     |
| GO:0006629             | lipid metabolic process           |                  | 10,0000          |                                                                                                                                                                                                                                                                                                                                                                                                                                                                                                                                                                                                                                                                                                           | ABCB11 ABCG1 ABHD3 ACAA2 ACADS ACADVL ACHE ACOT8 ACOX1ACSF2 ACSS2 ADM ADRA2A AGPAT2 APLP2 APOBR APOL2 ARSA ASPG3B3GNT5 B4GALNT2 BMP2 CEBPA CES1 CPT1A CPT2 CPTP CRAT CRYL1CWH43 CYP27A1 CYP27B1 CYP2J2 DECR1 DHRS3 DHRS9 DOLP1E1CHDC2 ECHS1 EC11 EC12 EPHX2 ETFA ETFB ETFDH FABP2 FGF2R2GDDP2 GGT6 GLTP GPD1L H2AFY HADH HINT2 HMGS2 HPGDHRASLS2 HSD11B2 HSD17B11 HSD17B2 IMPA2 INPP5J IP6K2 ISX KLF4L2GALS13 LIPC LPCAT1 MBOAT1 MBOAT2 MGLL MGST3 MOGAT2 TM1NAAA NANS NR5A2 PCK1 PDGFA PDK2 PGAP3 PHYH PIGZ PLCD3 PLCE1 PLCL2 PNPLA7 PPARC PPARG PRDX6 PRKCD PTK2B RARRS3 RETSATRXRA SERINC2 SESN2 SLC27A2 SMPD1 SMPDL3A ST3GAL4 TFC2L1THR6 TM6SF2 |
| GO:0055114             | oxidation-reduction process       |                  | 10,0000          |                                                                                                                                                                                                                                                                                                                                                                                                                                                                                                                                                                                                                                                                                                           | ACAA2 ACADS ACADVL ACO2 ACOT8 ACOX1 ACSS2 ADL AOC1 BDH1BMP2 COX41 COX5B COX6A1 COX6B1 COX7B COX8A CPT1A CPT2CRAT CRYL1 CYP27A1 CYP27B1 CYP2J2 DECR1 DHRS11 DHRS3 DHRS9DYRK2 ECHS1 EC11 EC12 EGLN3 ENPP1 ETFA ETFB ETFDH GPD1L HADH HADH HIGD1A HIGD2A HK2 HMOX1 HPGD HSD11B2 HSD17B11HSD17B2 HTATIP2 IDH3A LDHD MAOA MGST3 NDUFA6 NDUFB7O5GIN1 P3H2 PCK2 PGM1 PHYH PID1 PLOD2 PPARC PPARG PRDX6RETSAT SDHA SDHB SELENOS SESN2 SLC25A23 SLC27A2 SQOR SUCLG1SUCLG2 TPH1 UGP2 UQCR10 UQCR1 UQCRFS1 XDH                                                                                                                                                 |
| GO:0022402             | cell cycle process                | 10,0000          |                  | AJUBA ANAPC1 ANLN ARID3A ATRX AXIN2 BIRC5 BMP4 BMP7 BRCA1BRSK2 BUB1 CCNB1 CCND1 CDC25A CDC25B CDC45 CDC6 CDCA2CDCA8 CDK1 CDK2 CDK4 CDK6 CDKN2A CENPE CENPF CEP55CHEK1 CKAP2 CKS2 CLSPN DACH1 DDIA5 DSCC1 E2F7 ECT2 FOXM1GINS1 GPM2 GTSE1 HAUS6 HELLS HMGA2 IL1A IL1B INCENP INHBAIQGAP3 KIF11 KIF14 KIF18A KIF18B KIF2C KIF4A LIF LMNB1 MAD2L1MAP3K20 MCM10 MCM2 MCM3 MCM4 MCM6 MELK MET MKI67 MSH2MSX2 MYBL2 NBN NCAPG NCAPG2 NCAPH NEK2 NOLC1 NPM1 NUF2NUP107 NUP155 NUP205 NUP210 NUP58 PBK PHGDH PHLDA1 PKP4PLK2 PLK4 PNPT1 PPAT PRC1 PRKDC PROX1 RACGAP1 RAN RCC2 RPRMRM2 RRS1 RUVBL1 SKP2 SMC2 SMC4 SOX4 SOX9 STILSTMN1 TCF3 TFAF4 TIMELESS TOP2A TP53 TPD52L1 TPX2 TTK UBE2CWDR43 WDR62 XRC2 ZWINT |                                                                                                                                                                                                                                                                                                                                                                                                                                                                                                                                                                                                                                                     |
| GO:0000278             | mitotic cell cycle                | 10,0000          |                  | AJUBA ANAPC1 ANLN ARID3A ATRX BIRC5 BMP4 BMP7 BRSK2 BUB1CCNB1 CCND1 CDC25A CDC25B CDC45 CDC6 CDCA2 CDCA8 CDK1 CDK2 CDK4 CDK6 CDKN2A CENPE CENPF CEP55 CHEK1 CKA2 CKS2CLSPN DSCC1 E2F7 FOXM1 FZD3 GINS1 GPM2 GTSE1 HAUS6 HELLSHMGA2 IL1A IL1B INCENP INHBA IQGAP3 KIF11 KIF14 KIF18A KIF18BKIF2C KIF4A LMNB1 MAD2L1 MCDAS MCM10 MCM2 MCM3 MCM4MCM6 MELK MET MSH2 MYBL2 NBN NCAPG NCAPG2 NCAPH NEK2NOLC1 NPM1 NUF2 NUP107 NUP155 NUP205 NUP210 NUP58 PBKPHLDA1 PLK2 PLK4 PPAT PRC1 PRKDC RACGAP1 RAN RCC2 RPRMRM2 RRS1 RUVBL1 SKP2 SMC2 SMC4 SOX4 STIL STMN1 TCF3TIMELESS TOP2A TP53 TPD52L1 TPX2 TTK UBE2C WDR43 WDR62XRC2 ZWINT                                                                           |                                                                                                                                                                                                                                                                                                                                                                                                                                                                                                                                                                                                                                                     |

**Table S4**

The Enriched pathways of all deregulated genes in colorectal carcinoma.

| ID      | Title                                                       | Alternative splicing genes in CRC_logP | Mutated genes in CRC_logP | Overexpressed genes in CRC_logP | Downregulated genes in CRC_logP | Alternative splicing genes in CRC_GeneSet     | Mutated genes in CRC_GeneSet                                                                                   | Overexpressed genes in CRC_GeneSet                                                                                       | Downregulated genes in CRC_GeneSet                                                                                                                                                                                                                                                                                                                                                                                                                                                                                                                     |  |
|---------|-------------------------------------------------------------|----------------------------------------|---------------------------|---------------------------------|---------------------------------|-----------------------------------------------|----------------------------------------------------------------------------------------------------------------|--------------------------------------------------------------------------------------------------------------------------|--------------------------------------------------------------------------------------------------------------------------------------------------------------------------------------------------------------------------------------------------------------------------------------------------------------------------------------------------------------------------------------------------------------------------------------------------------------------------------------------------------------------------------------------------------|--|
| Pathway |                                                             | pValues                                |                           |                                 |                                 | Gene List                                     |                                                                                                                |                                                                                                                          |                                                                                                                                                                                                                                                                                                                                                                                                                                                                                                                                                        |  |
| 83054   | Cell cycle                                                  | 4,9273                                 | 2,7484                    | 10                              |                                 | CCND1 CDC25B CDKN2B MAD2L1 MCM2 MCM3 MDM2 SFN | ANAPC5 CREBBP MAD2L1 MCM7 ORC4 PRKDC TP53ITK                                                                   | ANAPC1 BUB1 CCNB1 CCND1 CDC25A CDC25B CDC45 CDG6 CDK1 CDK6 CDKN2A CHEK1 MAD2L1 MCM2 MCM3 MCM4 MCM6 PRKDC SKP2 TP53 TTK   |                                                                                                                                                                                                                                                                                                                                                                                                                                                                                                                                                        |  |
| 82955   | Fatty acid degradation                                      | 4,4303                                 |                           |                                 | 5,9342                          | ACAA2 ACADS ACAT1 ACOX1 CPT1A                 |                                                                                                                |                                                                                                                          | ACAA2 ACADS ACADVL ACAT1 ACOX1 CPT1A CPT2ECHS1 ECT1 ECI2 HADHA                                                                                                                                                                                                                                                                                                                                                                                                                                                                                         |  |
| 167325  | Protein processing in endoplasmic reticulum                 |                                        | 10                        |                                 |                                 |                                               | CANX DDI3 DDOST DERL1 EIF2AK2 ERO1A GANABHSP90AA1 HSP90AB1 HSPH1 HYOU1 NSF1LC1 P4HBD1A4 RRBP1 SEC24D VCP       |                                                                                                                          |                                                                                                                                                                                                                                                                                                                                                                                                                                                                                                                                                        |  |
| 125136  | Spliceosome                                                 |                                        | 10                        |                                 |                                 |                                               | DDX42 DDX5 HNRNPK HNRNPULR1 PRPF19 PRPF3 PRPF40A RBMX5 F3B2 SF3B4 SNRNP200 SNRNP SNU13 SNW1 SRSF6 THOC2 U2SURP |                                                                                                                          |                                                                                                                                                                                                                                                                                                                                                                                                                                                                                                                                                        |  |
| 132956  | Metabolic pathways                                          |                                        |                           |                                 | 10                              |                                               |                                                                                                                |                                                                                                                          | ACAA2 ACADS ACADVL ACAT1 ACYL ACO2 ACOT8 ACOX1 ACP5 ACS2 ADSLAGPAT2 AHCY AHCYL2 ANPEP AOC1 ATP5F1D ATP5ME ATP6V0D2 AZIN2B3 GNT5 B4GALNT3 B4GALT1 BDH1 CDA CES1 CHPF2 MAS CMBL COX4I1 COX5B COX6A1 COX6B1 COX7B COX8A CRYL1 CYP27A1 CYP27B1 CYP2J2 DHCR7D HRS3 DHR9 ECHS1 ENPP1 EPHX2 GALT GALNT12 GCNT2 GCNT3 GGT6 GMP5 GOT1 HADHA HGD HK2 HMGCL HMGCS2 HMOX1 HSD17B2 IDH3A IMPA2IN PPS1 HTPKA LIPC LPCAT1 MAOA MBOAT1 MBOAT2 MGAT4A MGLL MPI MTM1 NANS NAT2 NDUFA6ND UFB7 PAPSS2 PCK1 PCK2 PDXP PGM1 PLCD3PLCE1 PMM1 PRDX6 PRPS2 RIM1A SDHA SDHSEPHS2 |  |
| 83055   | p53 signaling pathway                                       |                                        |                           | 10                              |                                 |                                               |                                                                                                                | CCNB1 CCND1 CD82 CDK1 CDK6 CDKN2A CHEK1G TSE1 PMAIP1 RPRM RRM2 SERPINB5 TP53                                             |                                                                                                                                                                                                                                                                                                                                                                                                                                                                                                                                                        |  |
| 82927   | Citrate cycle (TCA cycle)                                   |                                        | 3,7496                    |                                 | 5,6769                          |                                               | ACO2 DLST IDH1 IDH2 SUCLA2                                                                                     |                                                                                                                          | ACLY ACO2 IDH3A PCK1 PCK2 SDHA SDHB SUCLG1 SUCLG2                                                                                                                                                                                                                                                                                                                                                                                                                                                                                                      |  |
| 868084  | Fatty acid metabolism                                       | 4,2445                                 |                           |                                 | 4,6866                          | ACAA2 ACADS ACAT1 ACOX1 CPT1A                 |                                                                                                                |                                                                                                                          | ACAA2 ACADS ACADVL ACAT1 ACOX1 CPT1A CPT2ECHS1 HAD3 HADHA                                                                                                                                                                                                                                                                                                                                                                                                                                                                                              |  |
| 814926  | Carbon metabolism                                           |                                        | 2,9831                    |                                 | 3,6172                          |                                               | ACO2 DLST ESD GLUD1 GOT2 IDH1 IDH2 SUCLA2                                                                      |                                                                                                                          | ACADS ACAT1 ACO2 ACS2 ECHS1 GOT1 HADHA HK2IDH3A PRPS2 SDHA SDHB SUCLG1 SUCLG2                                                                                                                                                                                                                                                                                                                                                                                                                                                                          |  |
| 82952   | Valine, leucine and isoleucine degradation                  | 3,1096                                 |                           |                                 | 2,4831                          | ACAA2 ACADS ACAT1 HMGCS2                      |                                                                                                                |                                                                                                                          | ACAA2 ACADS ACAT1 ECHS1 HADHA HMGCL HMGCS2                                                                                                                                                                                                                                                                                                                                                                                                                                                                                                             |  |
| 177876  | RNA transport                                               |                                        | 4,8919                    |                                 |                                 |                                               | EIF2S2 EIF3D EIF3E EIF4G2 EIF5B EXR1 NUP88 NUP98PABPC1 PABPC4 POM121 THOC2 XPO1                                |                                                                                                                          |                                                                                                                                                                                                                                                                                                                                                                                                                                                                                                                                                        |  |
| 413350  | Serine biosynthesis, glycerate-3P => serine                 |                                        |                           | 4,706                           |                                 |                                               |                                                                                                                | PHGDH PSAT1 PSPH                                                                                                         |                                                                                                                                                                                                                                                                                                                                                                                                                                                                                                                                                        |  |
| 790012  | Biosynthesis of amino acids                                 |                                        |                           | 4,5265                          |                                 |                                               |                                                                                                                | AADAT CPS1 ENO2 MAT1A PHGDH PRPS1 PSAT1P SPH PYCR1 SHMT2                                                                 |                                                                                                                                                                                                                                                                                                                                                                                                                                                                                                                                                        |  |
| 82942   | Oxidative phosphorylation                                   |                                        |                           |                                 | 4,494                           |                                               |                                                                                                                |                                                                                                                          | ATP1D ATP1 ATP6V0D2 COX4I1 COX5B COX6A1 COX6B1 COX7A2 COX7B COX8A NDUFA6 NDUFB7 SDHA SDHB UQCRC10 UQCRC1 UQCRES1                                                                                                                                                                                                                                                                                                                                                                                                                                       |  |
| 83042   | PPAR signaling pathway                                      |                                        |                           |                                 | 4,4701                          |                                               |                                                                                                                |                                                                                                                          | ACOX1 CPT1A CPT2 CYP27A1 FABP2 HMGCS2 PCK1 PCK2 PPARD PPARG RXRA SLC27A2                                                                                                                                                                                                                                                                                                                                                                                                                                                                               |  |
| 658418  | Viral carcinogenesis                                        |                                        | 4,1543                    |                                 |                                 |                                               | ACTN1 CASP8 CHD4 CREBBP DDB1 EIF2AK2 HNRNPKKRAS NFKB2 SCRIB SND1 SNW1 TP53                                     |                                                                                                                          |                                                                                                                                                                                                                                                                                                                                                                                                                                                                                                                                                        |  |
| 83007   | Butanoate metabolism                                        |                                        |                           |                                 | 3,9677                          |                                               |                                                                                                                |                                                                                                                          | ACADS ACAT1 BDH1 ECHS1 HADHA HMGCL HMGCS2                                                                                                                                                                                                                                                                                                                                                                                                                                                                                                              |  |
| 83061   | Wnt signaling pathway                                       |                                        |                           | 3,9108                          |                                 |                                               |                                                                                                                | AXIN2 CCND1 DKK1 FZD3 MMP7 NKD1 NKD2 NOTUMPLC8A PRKCG RUVBL1 TCF7 TP53                                                   |                                                                                                                                                                                                                                                                                                                                                                                                                                                                                                                                                        |  |
| 852705  | MicrRNAs in cancer                                          |                                        |                           | 3,7818                          |                                 |                                               |                                                                                                                | ABCC1 BRCA1 CCND1 CD44 CDC25A CDC25B CDK6 CDKN2A DDI4 DNMT1 FSCN1 EZD3 HMG2A IGF2 BP1MET PRKCG SERPINB5 SLC7A1 SOX4 TP53 |                                                                                                                                                                                                                                                                                                                                                                                                                                                                                                                                                        |  |
| 714485  | 2-Oxocarboxylic acid metabolism                             |                                        | 3,5917                    |                                 |                                 |                                               | ACO2 GOT2 IDH1 IDH2                                                                                            |                                                                                                                          |                                                                                                                                                                                                                                                                                                                                                                                                                                                                                                                                                        |  |
| 82957   | Arginine and proline metabolism                             |                                        | 3,5847                    |                                 |                                 |                                               | ALDH18A1 CNDP2 GOT2 OAT ODC1 P4HA1                                                                             |                                                                                                                          |                                                                                                                                                                                                                                                                                                                                                                                                                                                                                                                                                        |  |
| 413392  | Inosine monophosphate biosynthesis, PRPP + glutamine => IMP |                                        |                           | 3,4433                          |                                 |                                               |                                                                                                                | PAICS PFAS PPAT                                                                                                          |                                                                                                                                                                                                                                                                                                                                                                                                                                                                                                                                                        |  |
| 131226  | Peroxisome                                                  |                                        |                           |                                 | 3,2414                          |                                               |                                                                                                                |                                                                                                                          | ACOT8 ACOX1 CRAT ECI2 EPHX2 HMGCL PEX26 PH1YHPXMP2 SLC27A2 XDH                                                                                                                                                                                                                                                                                                                                                                                                                                                                                         |  |
| 172847  | Protein digestion and absorption                            |                                        |                           |                                 | 2,9425                          |                                               |                                                                                                                |                                                                                                                          | ATP1B3 COL17A1 KCNE3 KCNK5 MEPIA MEB1BPRS3 SLC15A1 SLC1A1 SLC36A1 SLC6A19                                                                                                                                                                                                                                                                                                                                                                                                                                                                              |  |
| 413380  | Fatty acid biosynthesis, elongation, mitochondria           |                                        |                           |                                 | 2,8971                          |                                               |                                                                                                                |                                                                                                                          | ACAA2 ECHS1 HADHA                                                                                                                                                                                                                                                                                                                                                                                                                                                                                                                                      |  |
| 83004   | Propanoate metabolism                                       |                                        |                           |                                 | 2,763                           |                                               |                                                                                                                |                                                                                                                          | ACAT1 ACS2 ECHS1 HADHA SUCLG1 SUCLG2                                                                                                                                                                                                                                                                                                                                                                                                                                                                                                                   |  |
| 82979   | Amino sugar and nucleotide sugar metabolism                 |                                        |                           | 2,4831                          |                                 |                                               |                                                                                                                |                                                                                                                          | CMAS HK2 MPI NANS PGM1 PMM1 UGP2                                                                                                                                                                                                                                                                                                                                                                                                                                                                                                                       |  |

**Table S5**

**Section S5-A:** The Enriched pathways of deregulated genes in right vs left colorectal carcinoma; **Section S5-B:** The Enriched pathways of deregulated genes in colorectal carcinoma with GI-II vs GIII-IV; **Section: S5-C** The Enriched pathways of deregulated genes in colorectal carcinoma with GI-II vs GIII-IV.

| Section | Category | ID     | Title (or Source)                                         | Cluster 2_logP<br>pValues | Cluster 2_GeneSet<br>Gene List                                                                                                     |
|---------|----------|--------|-----------------------------------------------------------|---------------------------|------------------------------------------------------------------------------------------------------------------------------------|
| S5-A    | Pathway  | 83036  | Ribosome                                                  | 3,9620                    | RPL10 RPL10A RPL12 RPL13 RPL14 RPL17 RPL21 RPL22 RPL26 RPL35A RPL37A RPL38 RPL39 RPL5 RPL6 RPS11 RPS15 RPS19 RPS21 RPS4X RPS5 RPS9 |
| S5-B    | Pathway  | 790012 | Biosynthesis of amino acids                               | 3,7944                    | ALDOB CPS1 PGAM4                                                                                                                   |
|         | Pathway  | 413342 | Gluconeogenesis, oxaloacetate => fructose-6P              | 3,5766                    | ALDOB PGAM4                                                                                                                        |
|         | Pathway  | 814926 | Carbon metabolism                                         | 3,2581                    | ALDOB CPS1 PGAM4                                                                                                                   |
|         | Pathway  | 413340 | Glycolysis (Embden-Meyerhof pathway), glucose => pyruvate | 3,236                     | ALDOB PGAM4                                                                                                                        |
| S5-C    | Pathway  | 82957  | Arginine and proline metabolism                           | 3,4845                    | CKMT2 MAOB                                                                                                                         |



























Table with columns: chr, Cufflinks, exon, coordinates (start/end), +/-, XLOC ID, TCONS ID, gene names (e.g., PAICS, SPP1, LETM1, NAAA, HPGD, GZMA, GRAMD3, SLC12A2, C5orf30), and accession numbers (e.g., NM\_001079524, NM\_01040058).









**Table S8.**

The fusion genes selected for RT-PCR and Sanger sequencing validation

|                                               |                                                                                                                              |                                                                                                                               |                                                                                                             |                                                                                                             |
|-----------------------------------------------|------------------------------------------------------------------------------------------------------------------------------|-------------------------------------------------------------------------------------------------------------------------------|-------------------------------------------------------------------------------------------------------------|-------------------------------------------------------------------------------------------------------------|
| # Patient                                     | 11                                                                                                                           | 43                                                                                                                            | 53                                                                                                          | 81                                                                                                          |
| Gene 1 symbol (5end fusion partner)           | EEF1A1                                                                                                                       | EEF1A1                                                                                                                        | KRT19                                                                                                       | KRT19                                                                                                       |
| Gene 2 symbol (3end fusion partner)           | HSP90AB1                                                                                                                     | HSP90AB1                                                                                                                      | KRT18                                                                                                       | KRT18                                                                                                       |
| Fusion description                            | oncogene,cancer,m3                                                                                                           | oncogene,cancer,m2                                                                                                            | exon-exon                                                                                                   | exon-exon                                                                                                   |
| Counts of common mapping reads                | 0                                                                                                                            | 0                                                                                                                             | 0                                                                                                           | 0                                                                                                           |
| Spanning pairs                                | 4                                                                                                                            | 5                                                                                                                             | 2                                                                                                           | 2                                                                                                           |
| Spanning unique reads                         | 1                                                                                                                            | 1                                                                                                                             | 3                                                                                                           | 3                                                                                                           |
| Longest anchor found                          | 47                                                                                                                           | 47                                                                                                                            | 20                                                                                                          | 20                                                                                                          |
| Fusion finding method                         | BOWTIE+BLAT                                                                                                                  | BOWTIE+STAR                                                                                                                   | BOWTIE                                                                                                      | BOWTIE                                                                                                      |
| Fusion point for gene 1 (5end fusion partner) | 6:73519944:-                                                                                                                 | 6:73519891:-                                                                                                                  | 17:41524843:-                                                                                               | 17:41524843:-                                                                                               |
| Fusion point for gene 2 (3end fusion partner) | 6:44253176:+                                                                                                                 | 6:44250304:+                                                                                                                  | 12:52951481:+                                                                                               | 12:52951481:+                                                                                               |
| Gene 1 id (5end fusion partner)               | ENSG00000156508                                                                                                              | ENSG00000156508                                                                                                               | ENSG00000171345                                                                                             | ENSG00000171345                                                                                             |
| Gene 2 id (3end fusion partner)               | ENSG00000096384                                                                                                              | ENSG00000096384                                                                                                               | ENSG00000111057                                                                                             | ENSG00000111057                                                                                             |
| Exon 1 id (5end fusion partner)               |                                                                                                                              |                                                                                                                               | ENSE00003539860                                                                                             | ENSE00003539860                                                                                             |
| Exon 2 id (3end fusion partner)               |                                                                                                                              |                                                                                                                               | ENSE00003502582                                                                                             | ENSE00003502582                                                                                             |
| Fusion sequence                               | GTCATTGGACACGTA<br>GATTCGGGCAAGTCC<br>ACCACTACTGGCCATC<br>TGAT*GGCCAAAAAG<br>CACCTGGAGATCAAC<br>CCTGACCACCCATTG<br>TGGAGACGC | TAAATGCGGTGGCAT<br>CGACAAAAGAACCAT<br>TGAAAAATTTGAGAA<br>GGAGG*GAGAGAAGG<br>AAATTAGTGATGATG<br>AGGCAGAGGAAGAG<br>AAAGGTGAGAAA | CCTGAAGGAAGAGCT<br>GGCCTACCTGAAGAA<br>GAACCATGAGGAG*G<br>AAGTAAAAGGCCTAC<br>AAGCCCAGATTGCCA<br>GCTCTGGGTTGA | CCTGAAGGAAGAGCT<br>GGCCTACCTGAAGAA<br>GAACCATGAGGAG*G<br>AAGTAAAAGGCCTAC<br>AAGCCCAGATTGCCA<br>GCTCTGGGTTGA |
| Predicted effect                              | in-frame                                                                                                                     | in-frame                                                                                                                      | in-frame                                                                                                    | in-frame                                                                                                    |
